# Supplementary material
Source: MDPI journal article supplement (https://www.mdpi.com/1424-8247/16/2/304)

# Supplementary Information

## Discovery of ureido-like Apcin analogs as Cdc20-specific inhibitors against cancer

Yiqin He <sup>1,2,3</sup>, Xiangyang Le <sup>1,2,3</sup>, Gaoyun Hu <sup>1,2,3</sup>, Qianbin Li <sup>1,2,3</sup>, Zhuo Chen <sup>1,2,3\*</sup>

<sup>1</sup> Department of Medicinal Chemistry, Xiangya School of Pharmaceutical Sciences, Central South University, Changsha 410013, Hunan, China

<sup>2</sup> Hunan Key Laboratory of Organ Fibrosis; Changsha 410013, Hunan, China

<sup>3</sup> Hunan Key Laboratory of Diagnostic and Therapeutic Drug Research for Chronic Diseases; Changsha 410013, Hunan, China

\* Correspondence: (Email: cz\_job@csu.edu.cn) +86-826500370.

### Contents

|                                         |      |      |
|-----------------------------------------|------|------|
| NMR, HRMS and HMBC spectra of compounds | page | 2-48 |
|-----------------------------------------|------|------|

HYQ-B000-2/2

Chemical structure of compound 10: CC1=CN(C=C1[N+](=O)[O-])CCNC(=O)NC(CCl)N2=CC=CC=N2

<sup>1</sup>H NMR spectrum (CDCl<sub>3</sub>) showing peaks and integration values:

| Chemical Shift (ppm)         | Integration            |
|------------------------------|------------------------|
| 8.40, 8.37, 8.20, 7.98, 7.86 | 2.42, 1.18, 0.96, 0.99 |
| 6.56, 6.53                   | 1.83                   |
| 4.30, 4.27, 3.51, 3.46       | 2.09, 2.16             |
| 2.33, 2.32, 2.30             | 3.00                   |

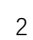

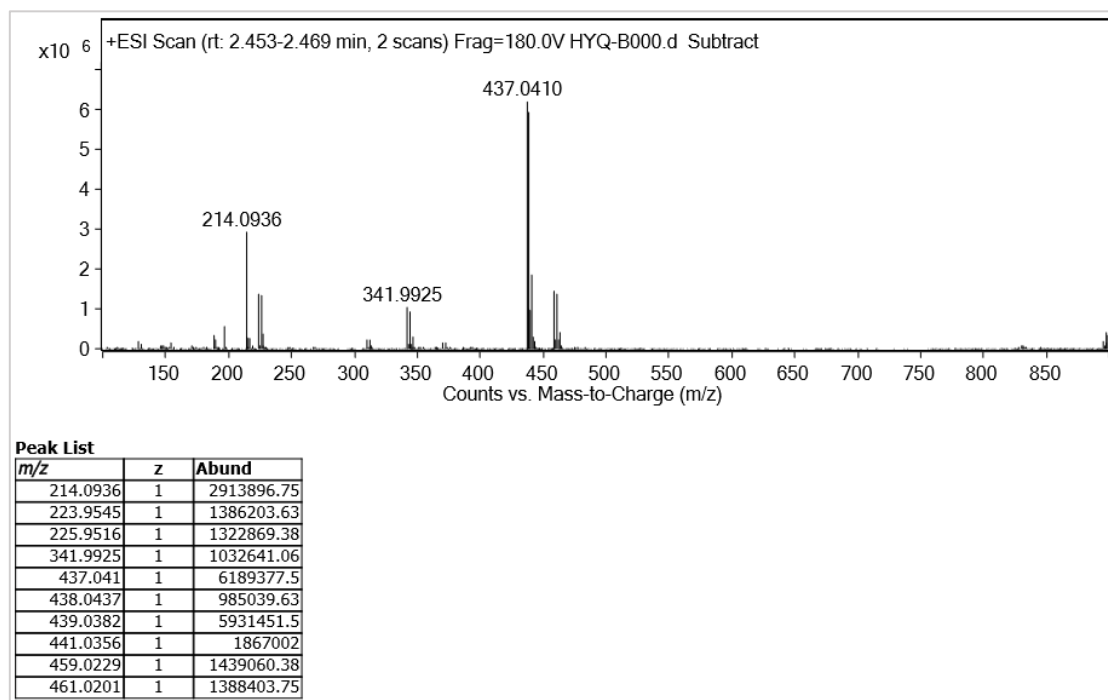

## Compound 2

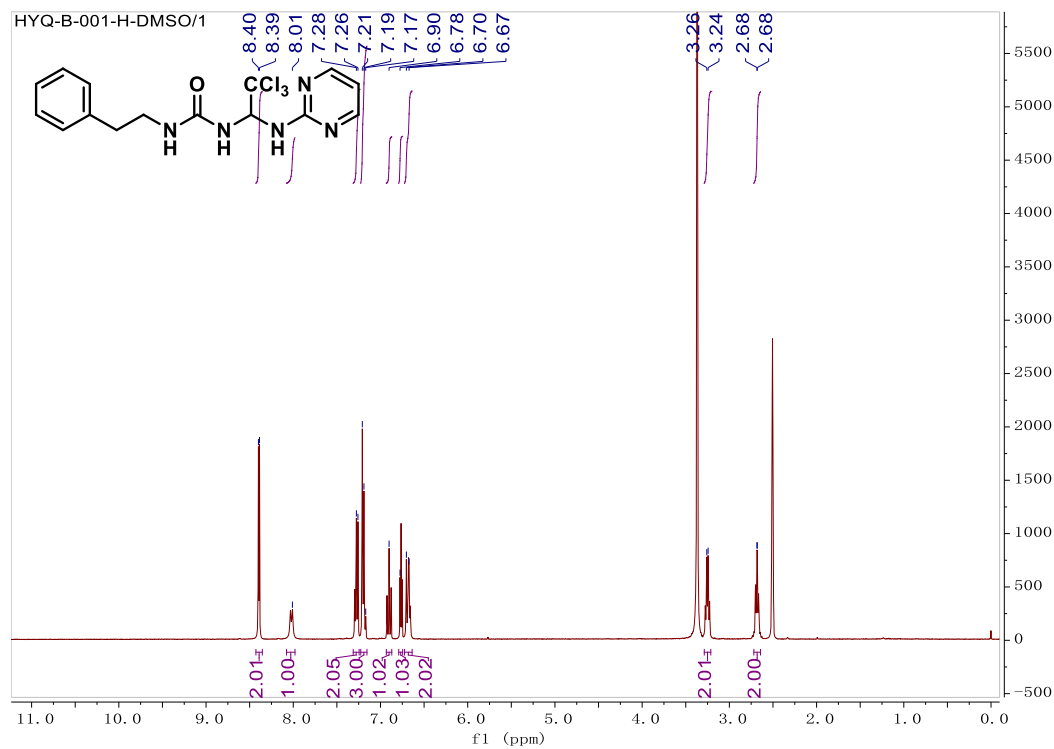

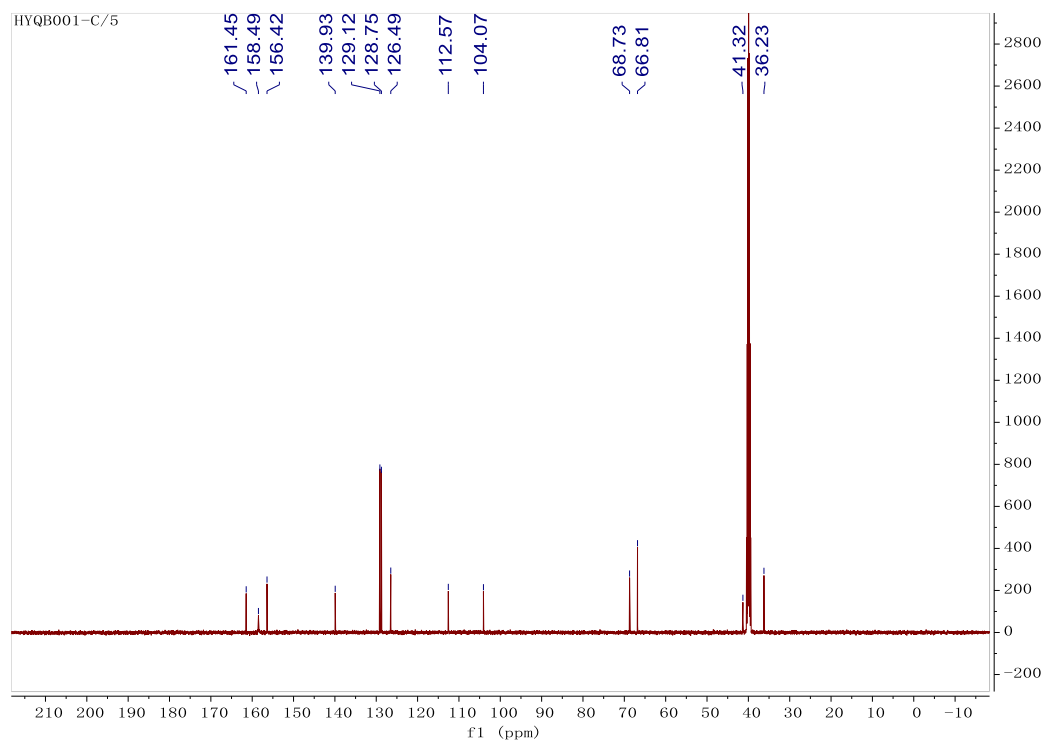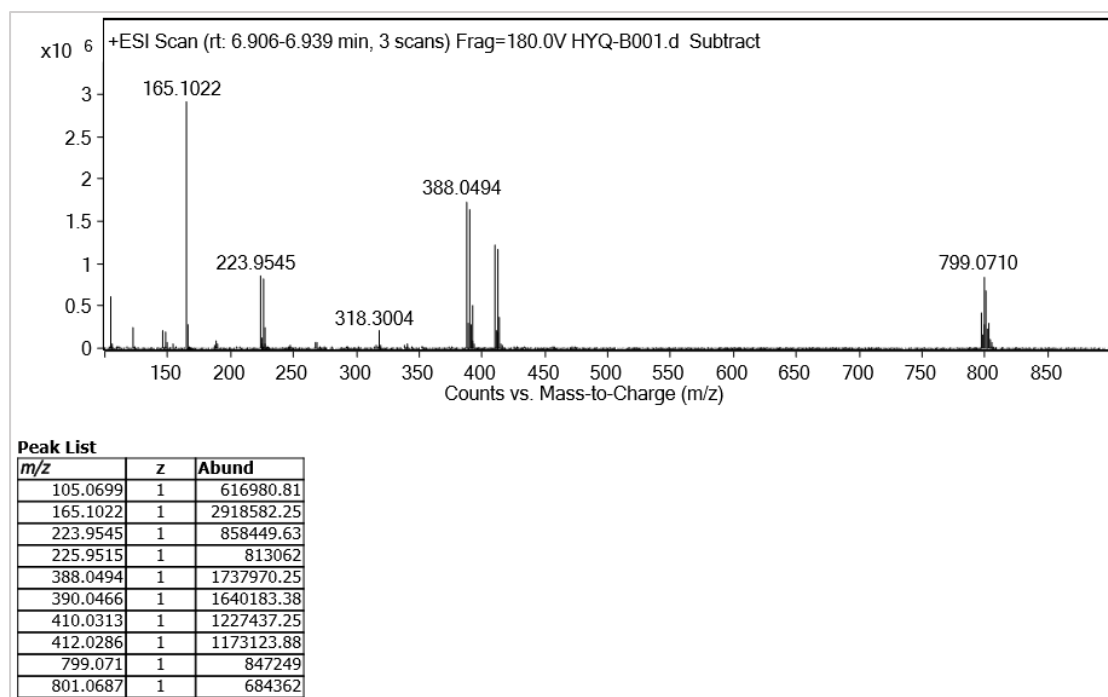

# Compound 3

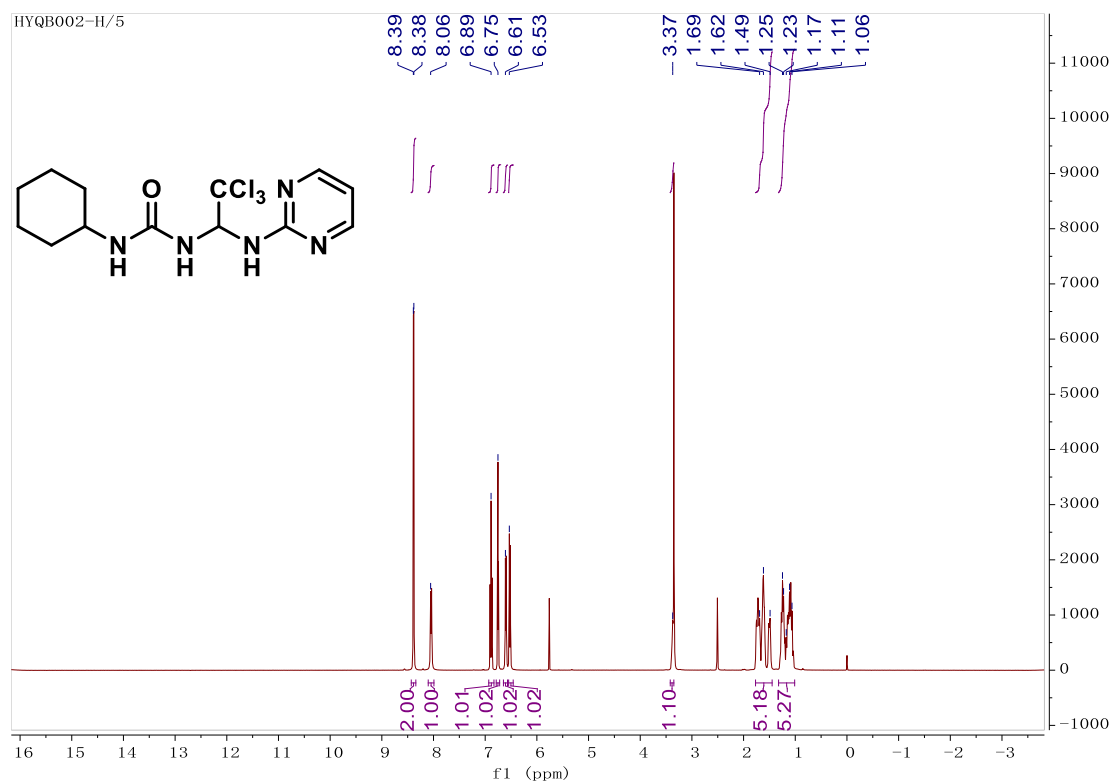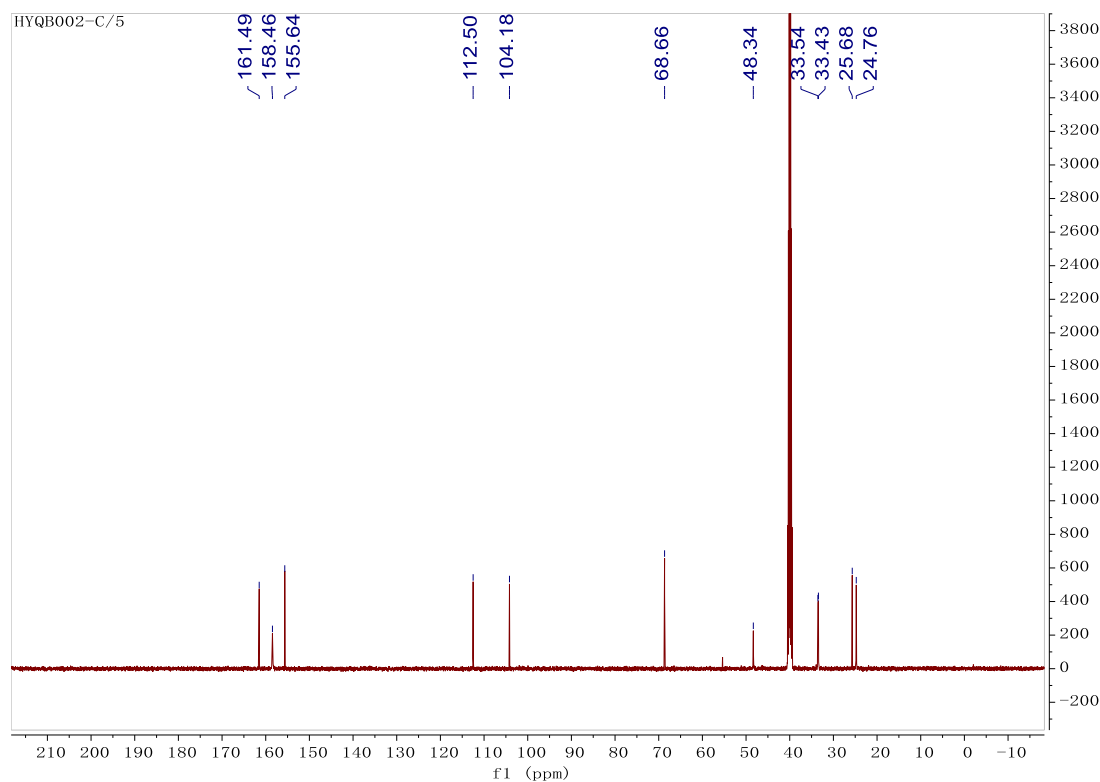

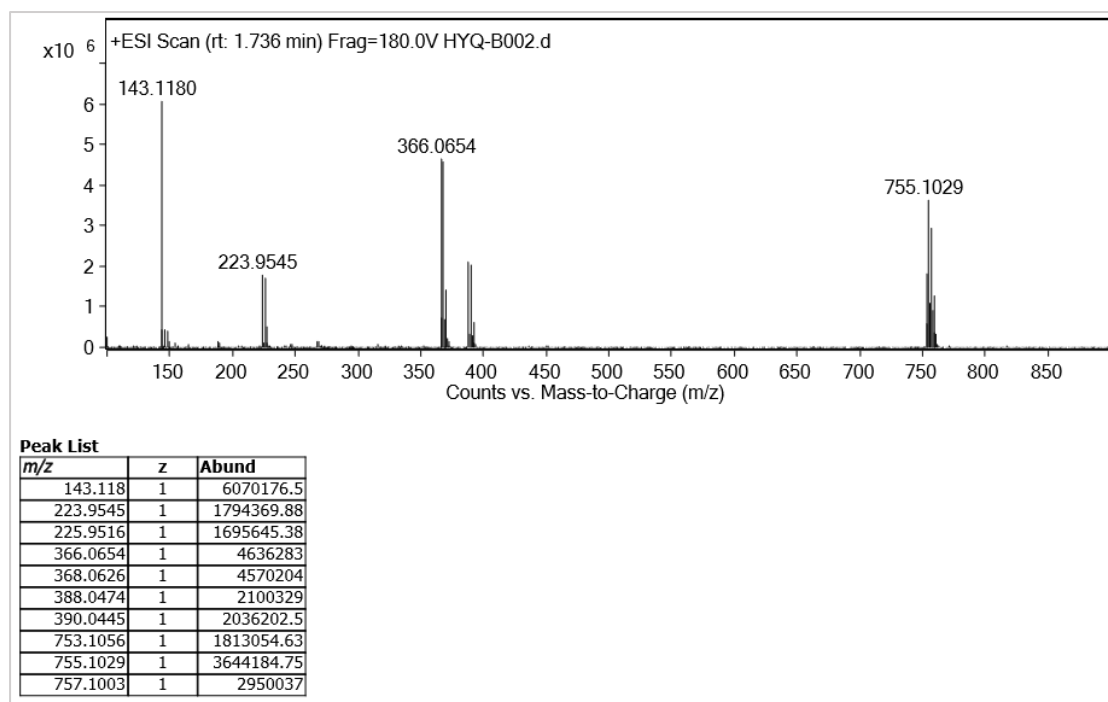

## Compound 4

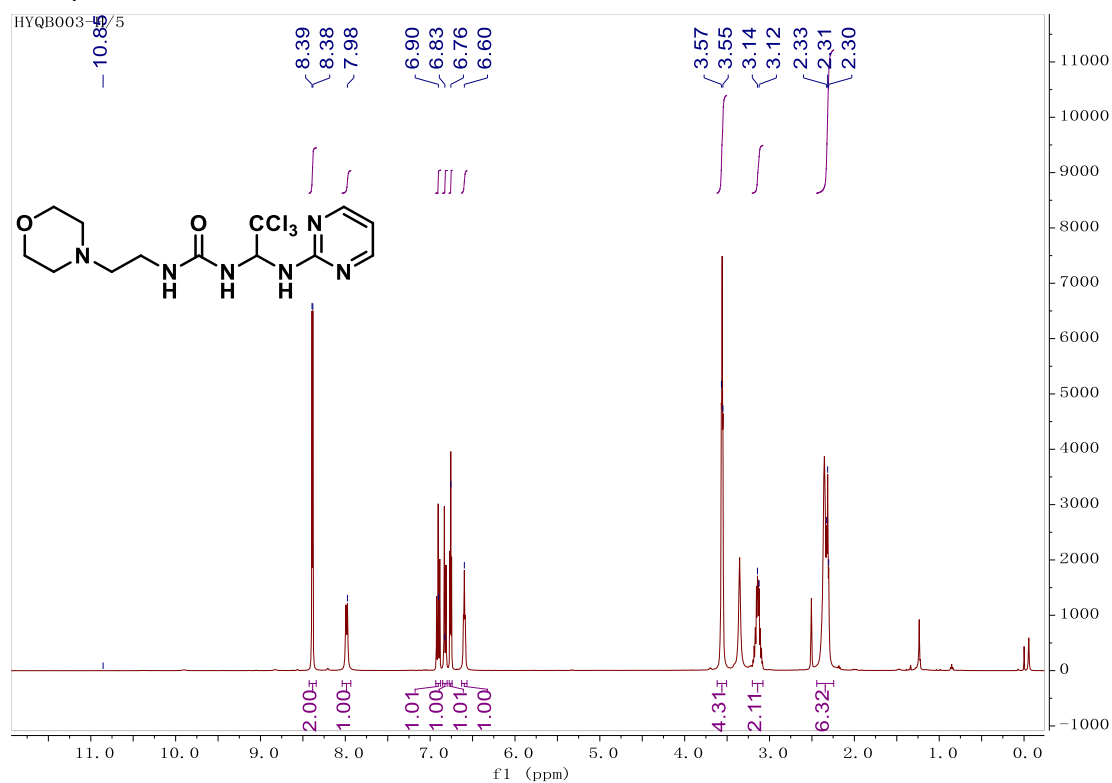

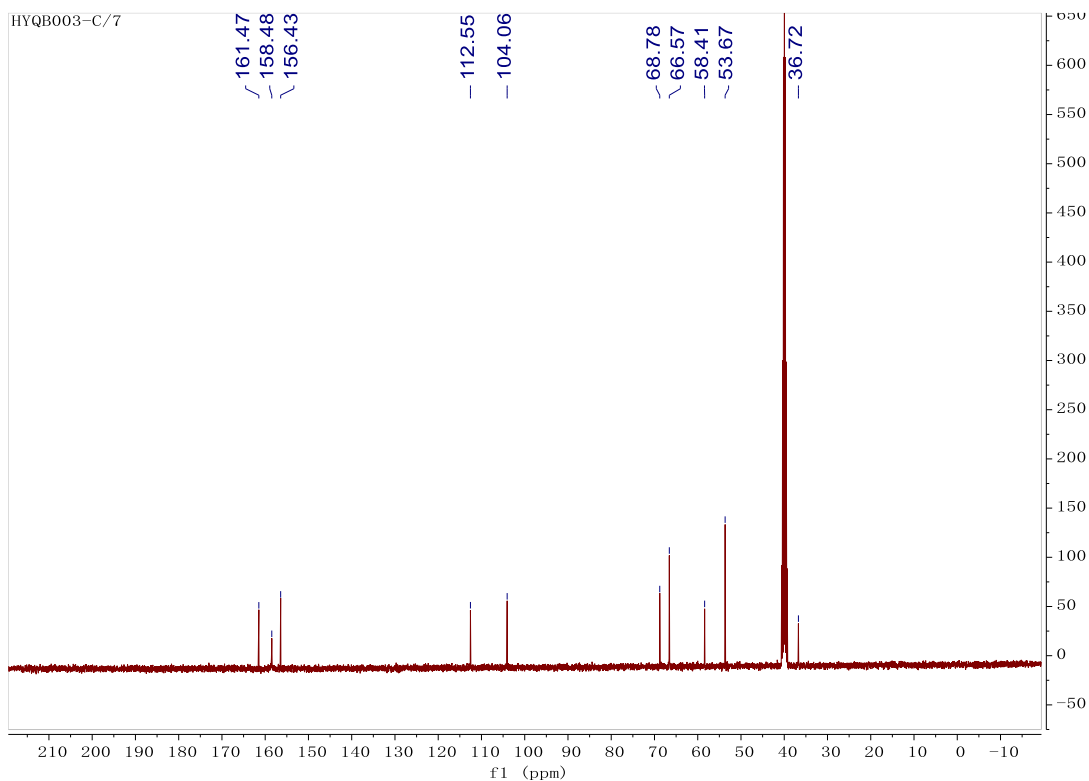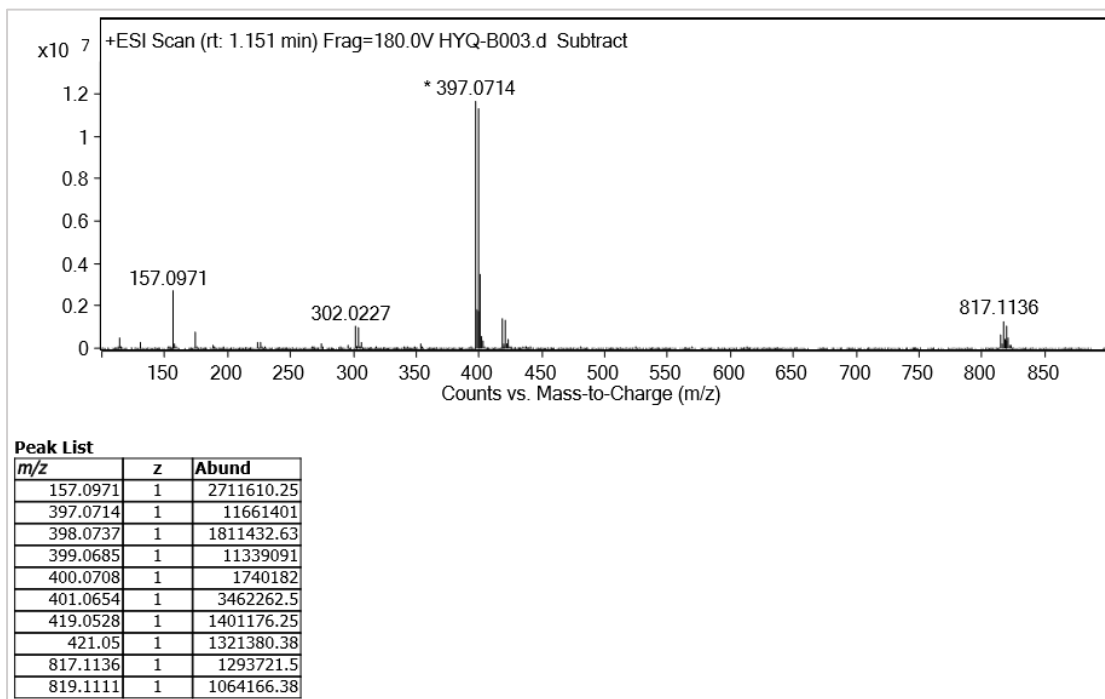

# Compound 5

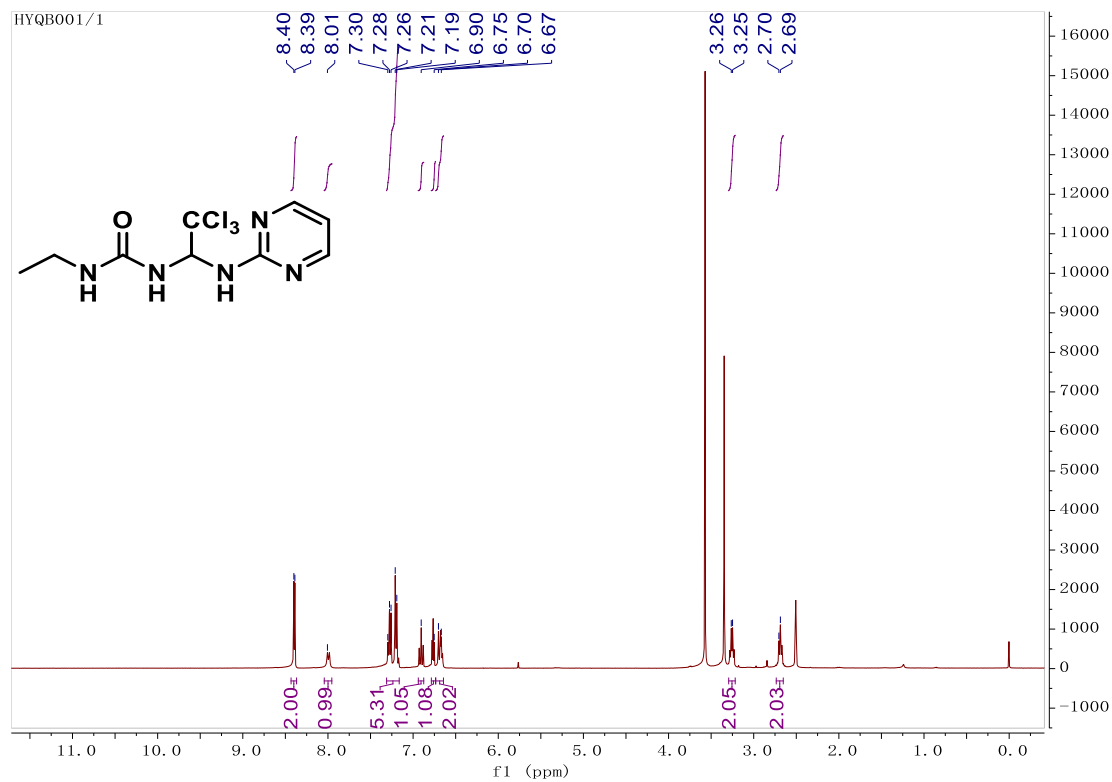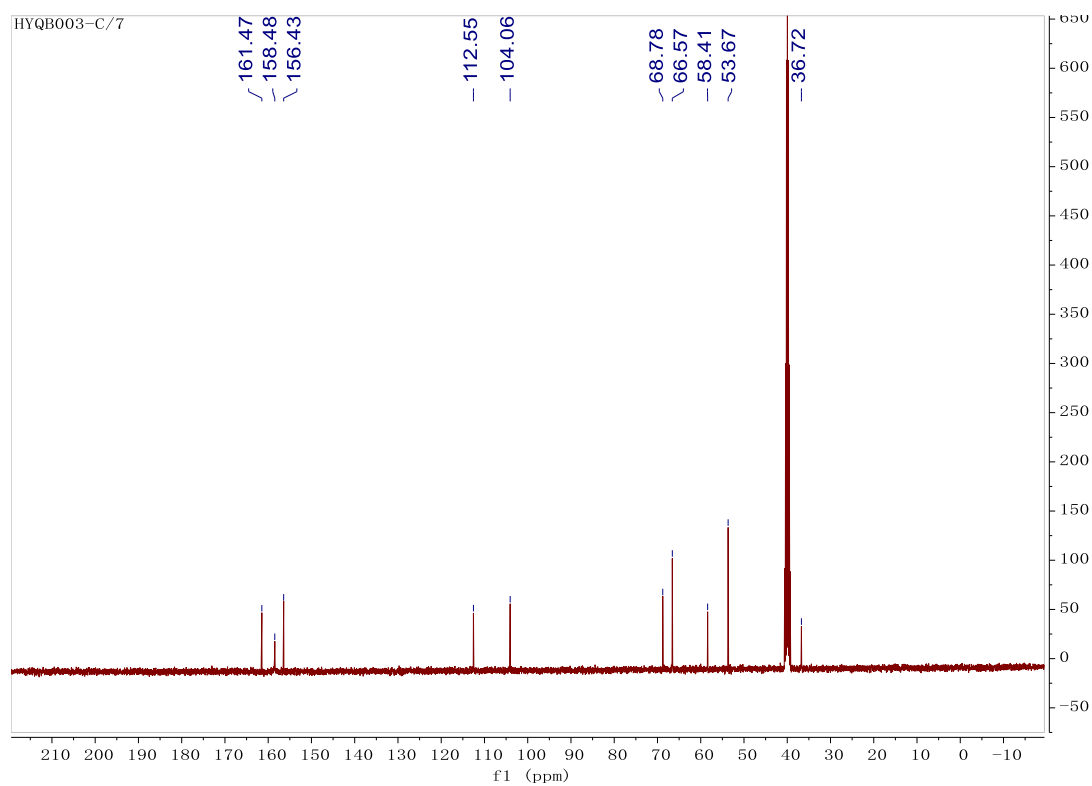



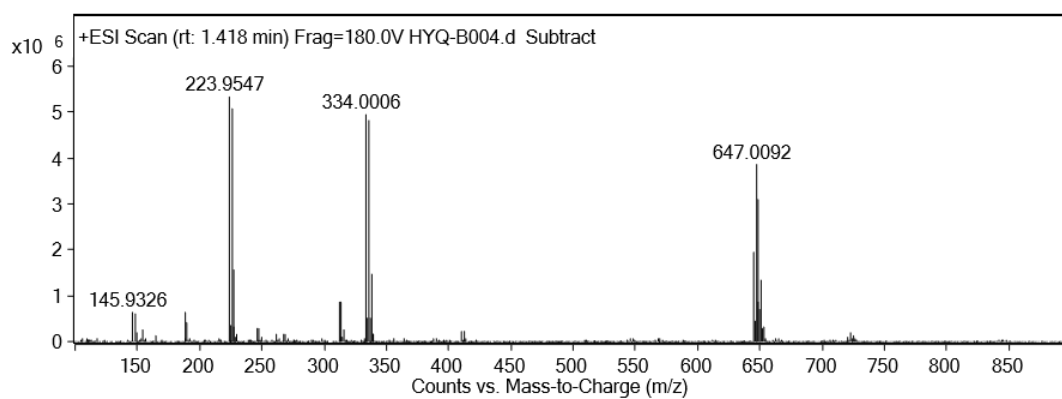

#### Peak List

| m/z      | z | Abund      |
|----------|---|------------|
| 223.9547 | 1 | 5329879    |
| 225.9518 | 1 | 5086102.5  |
| 227.9488 | 1 | 1556247.63 |
| 334.0006 | 1 | 4929472    |
| 335.9977 | 1 | 4800584.5  |
| 337.9949 | 1 | 1480485.63 |
| 645.0121 | 1 | 1946913    |
| 647.0092 | 1 | 3872751    |
| 649.0065 | 1 | 3084400.5  |
| 651.0039 | 1 | 1337346.38 |

#### Compound 6

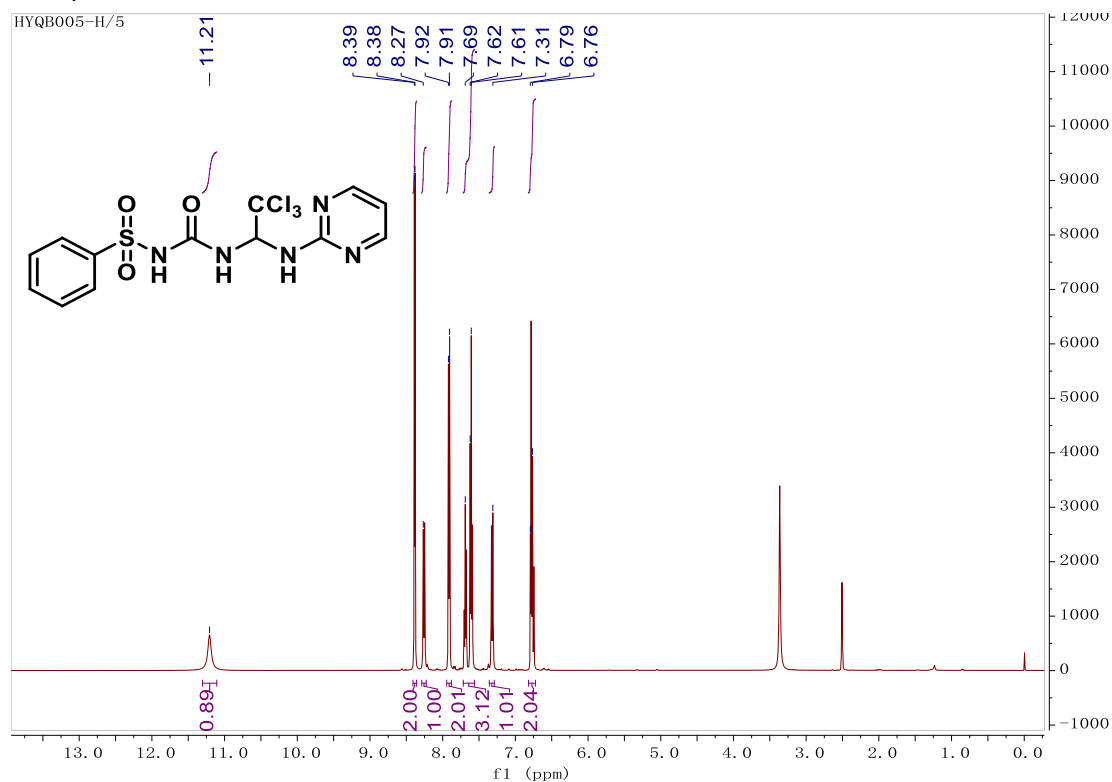

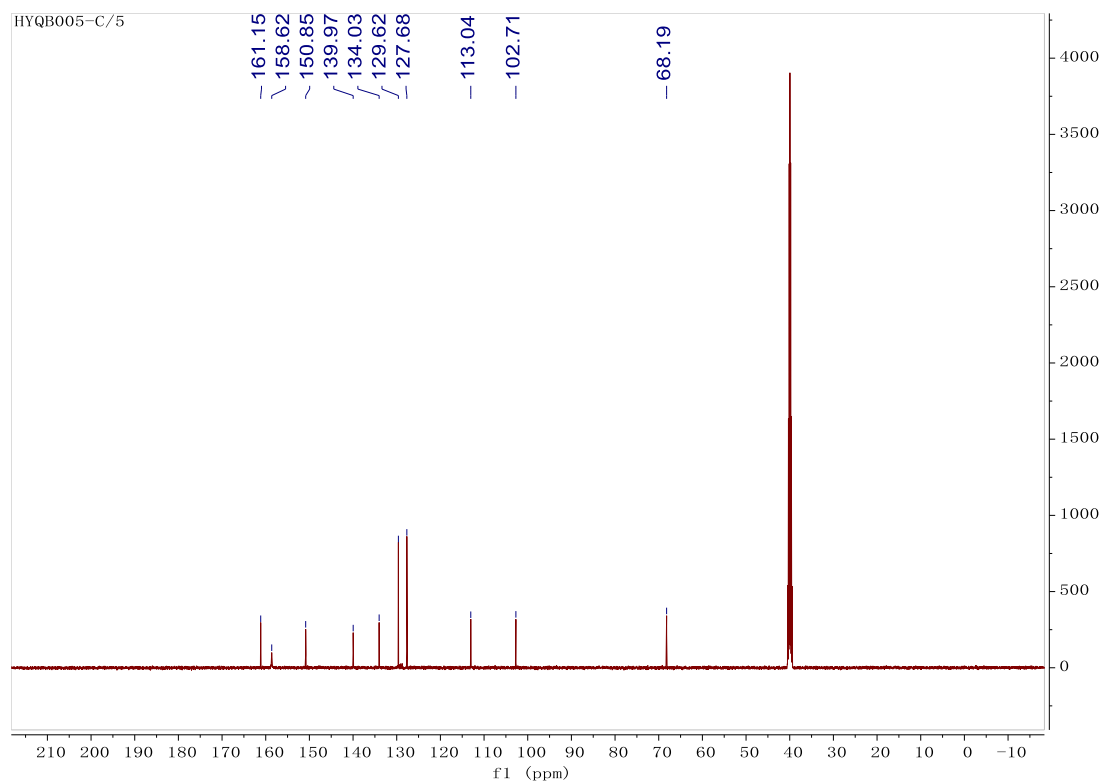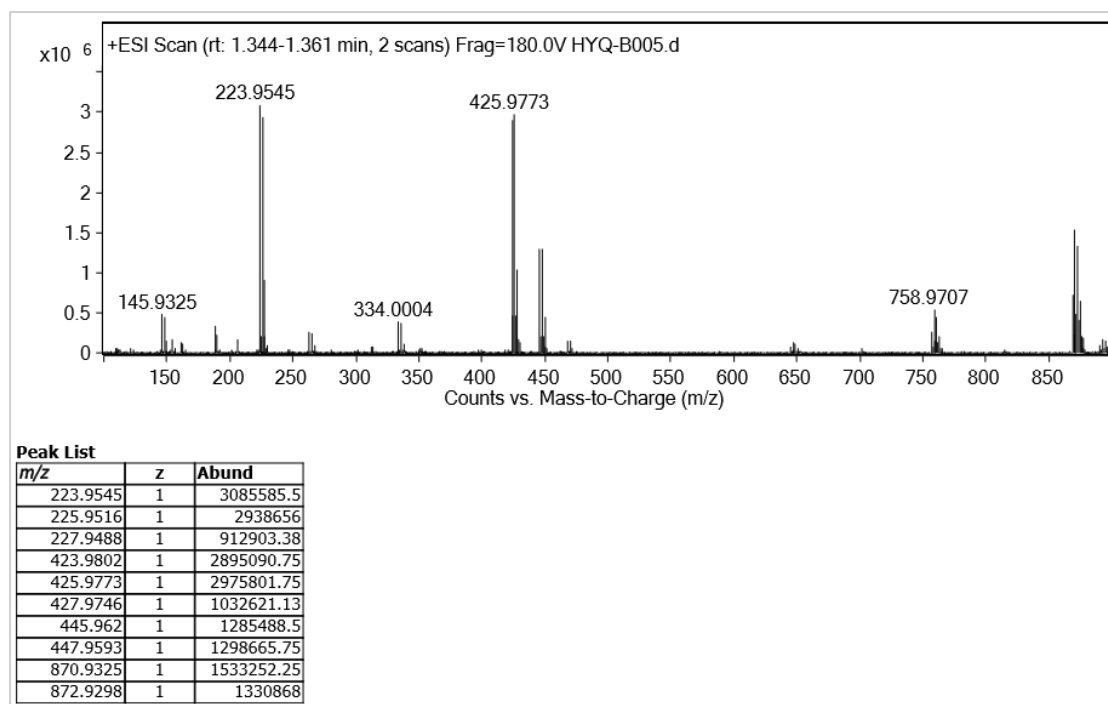

# Compound 7

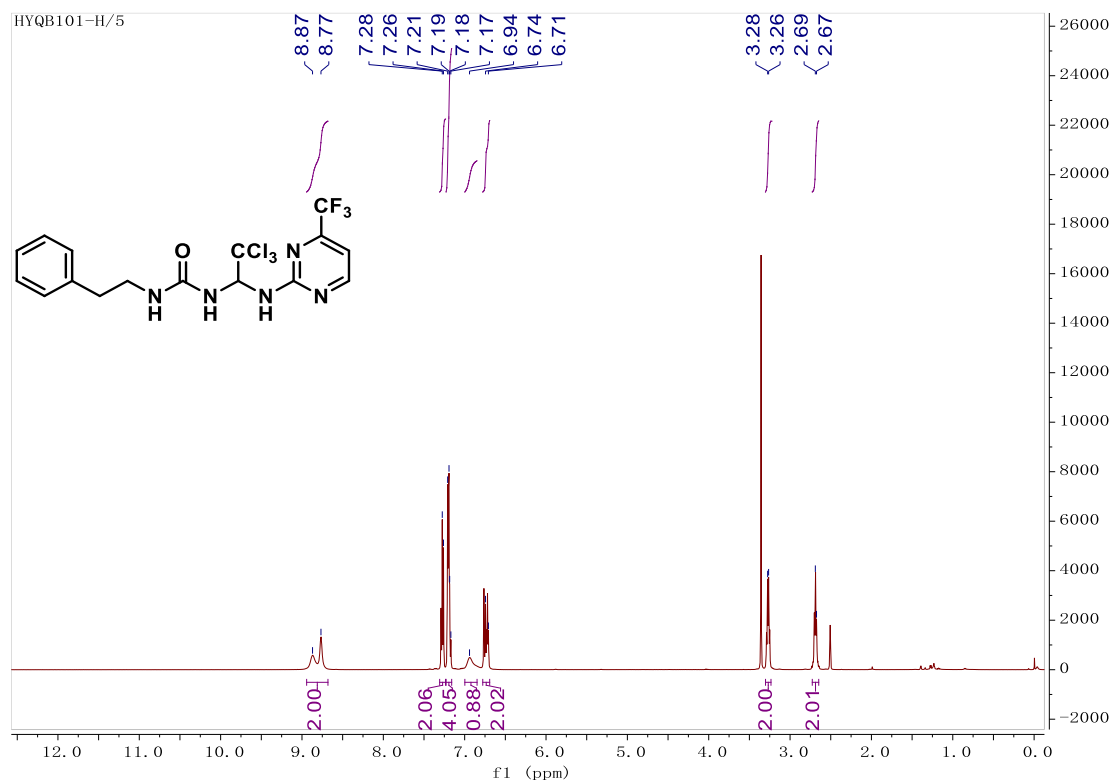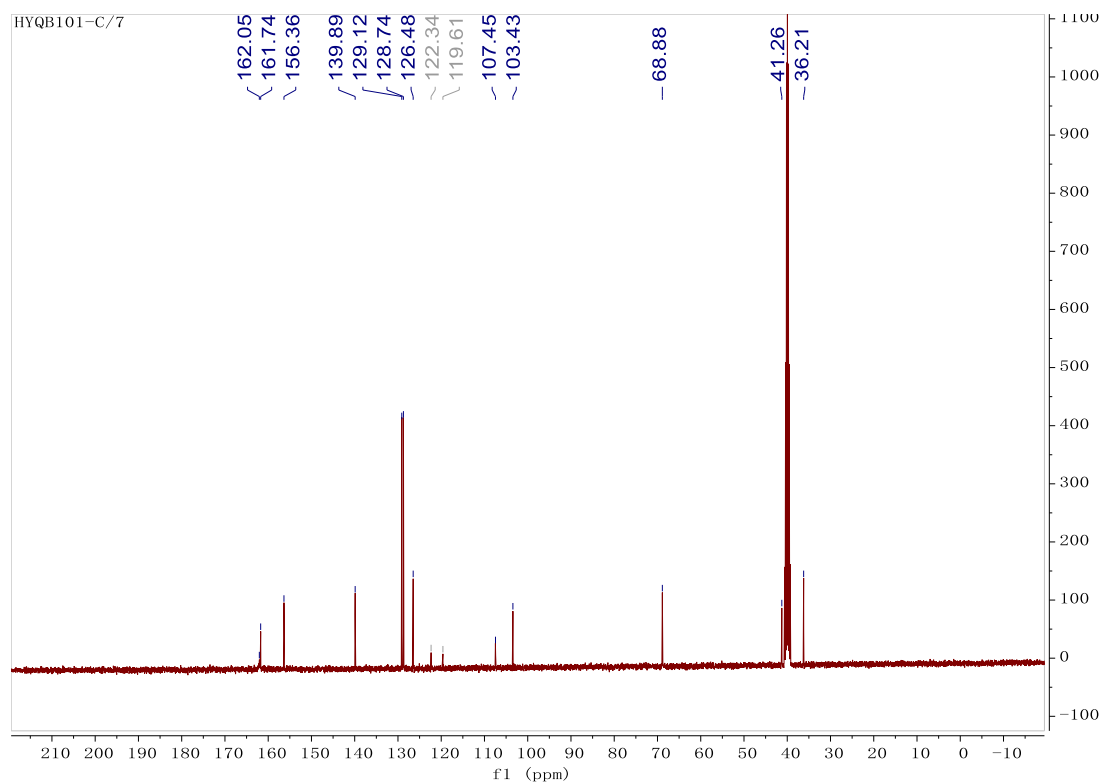

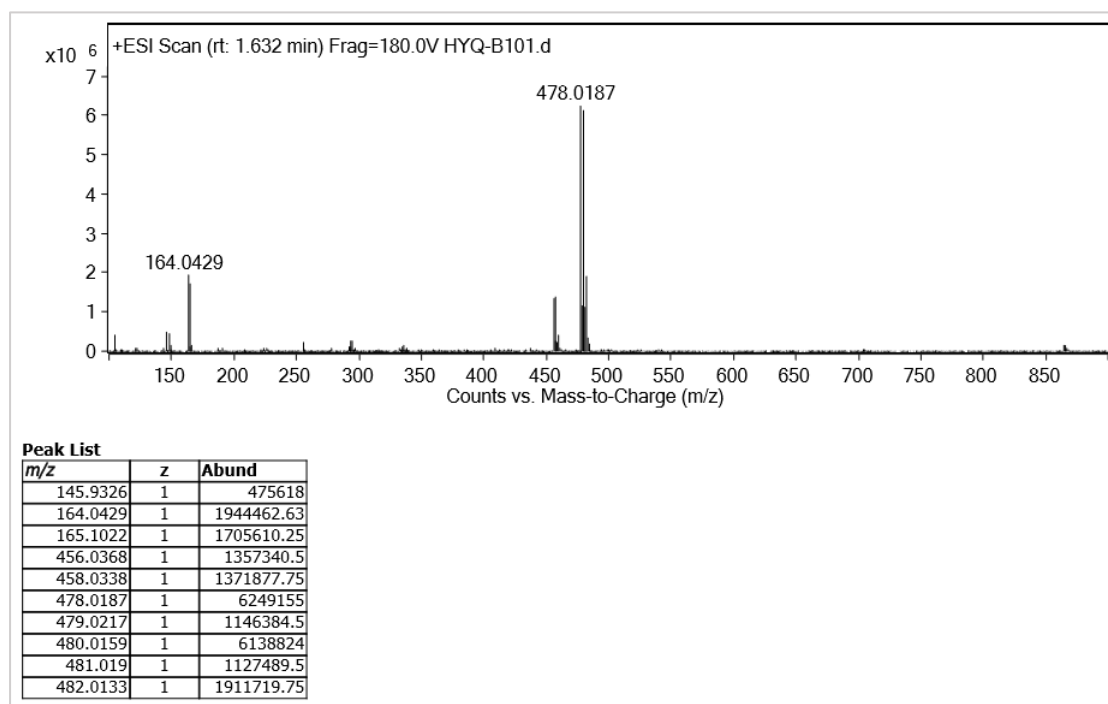

## Compound 8

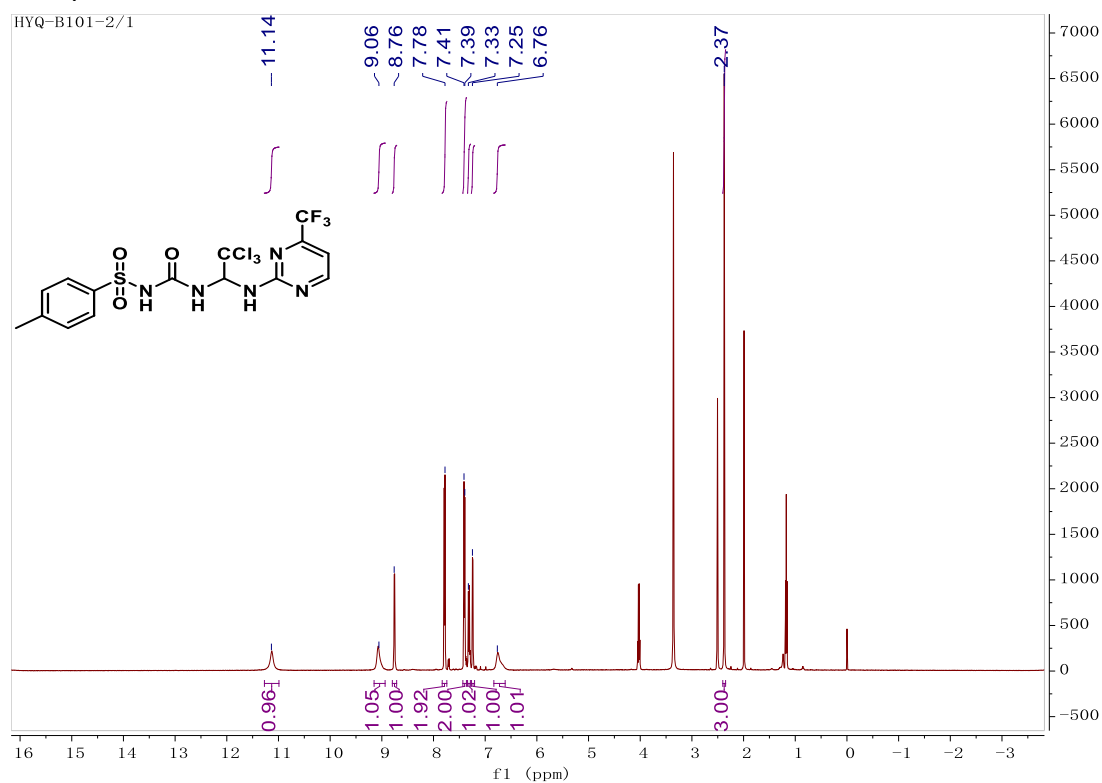

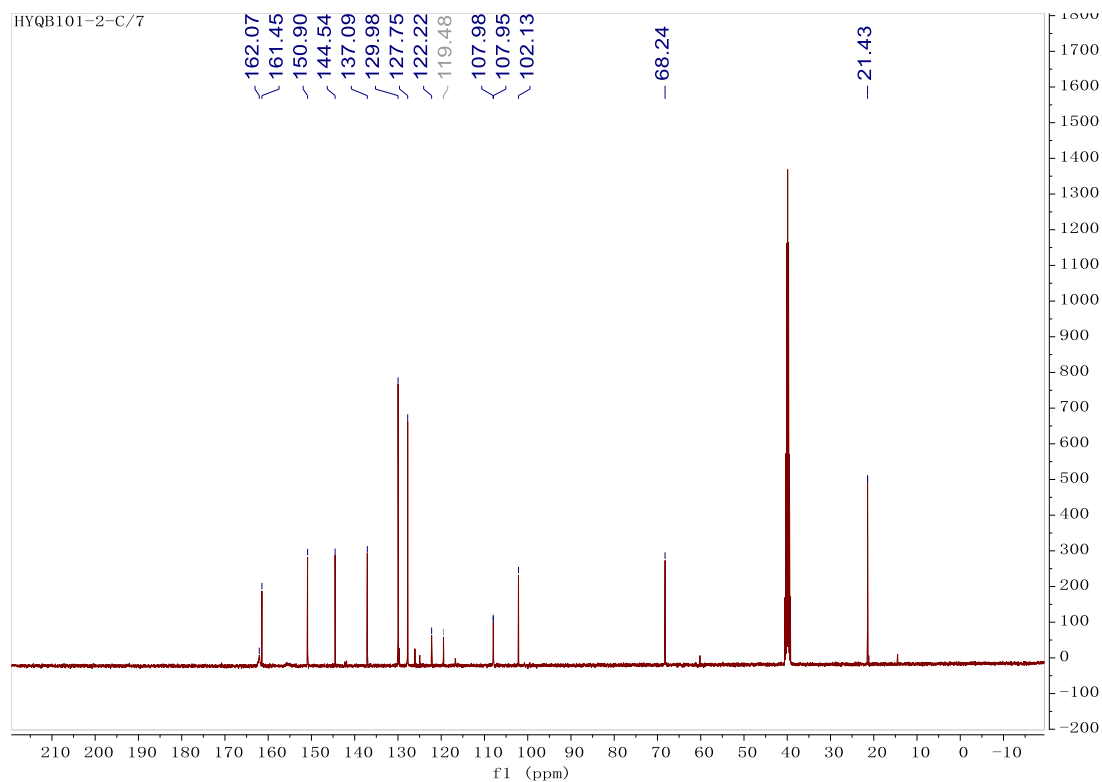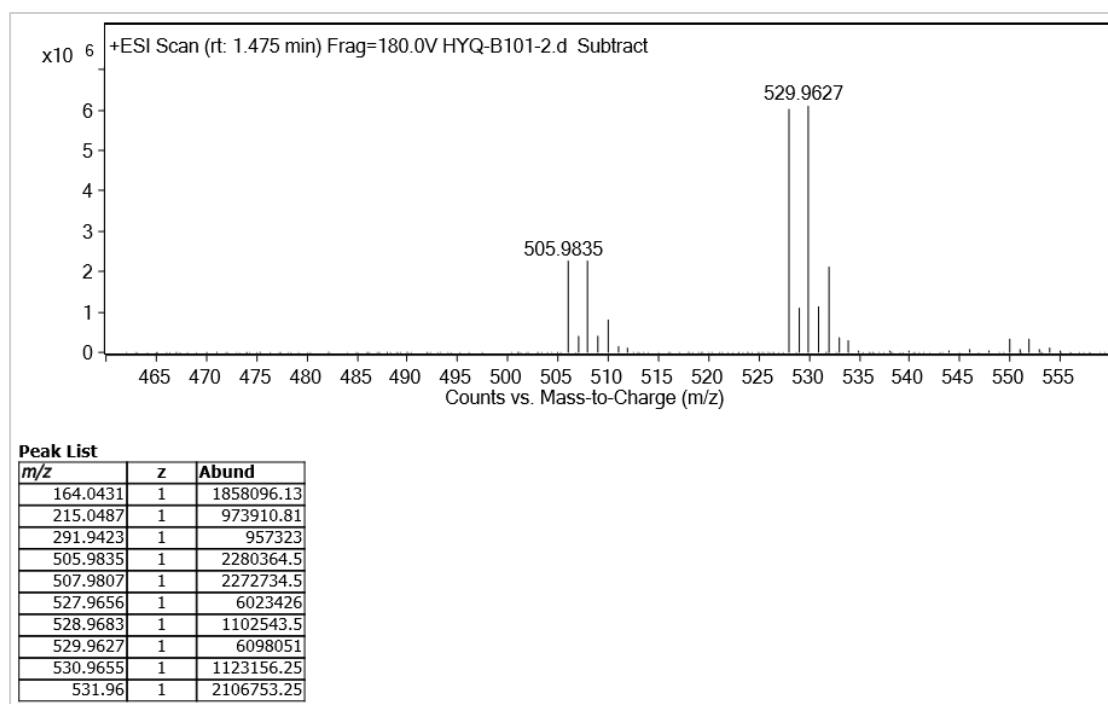

# Compound 9

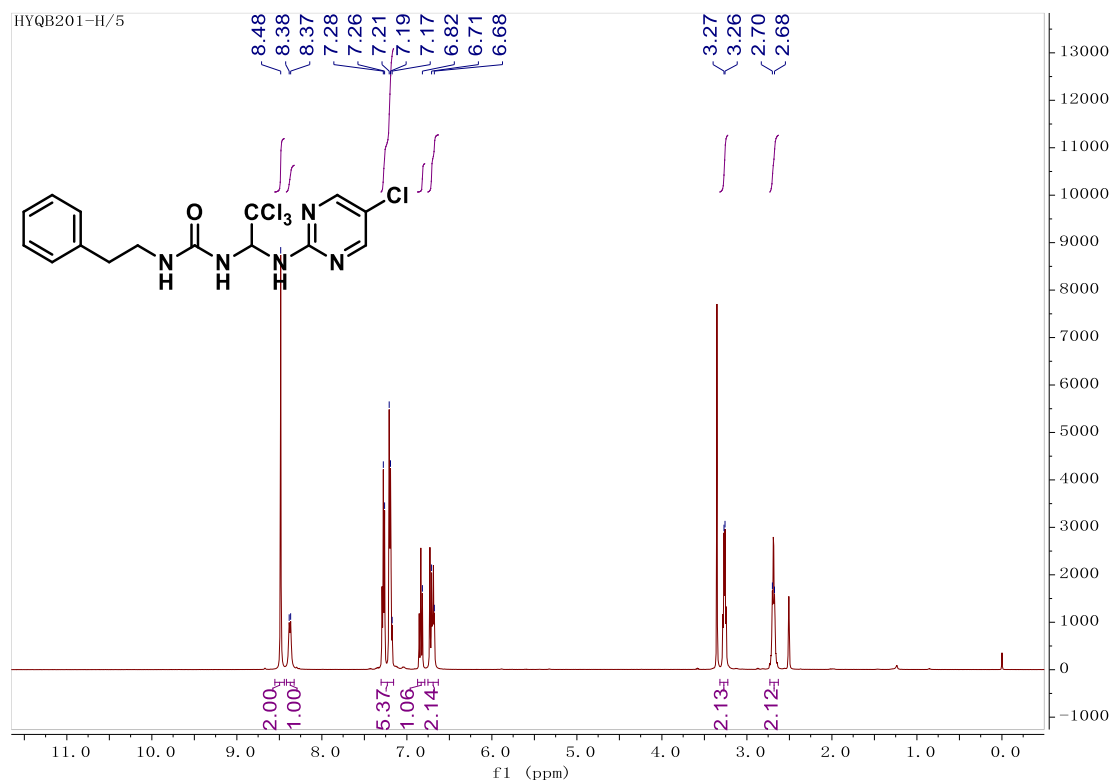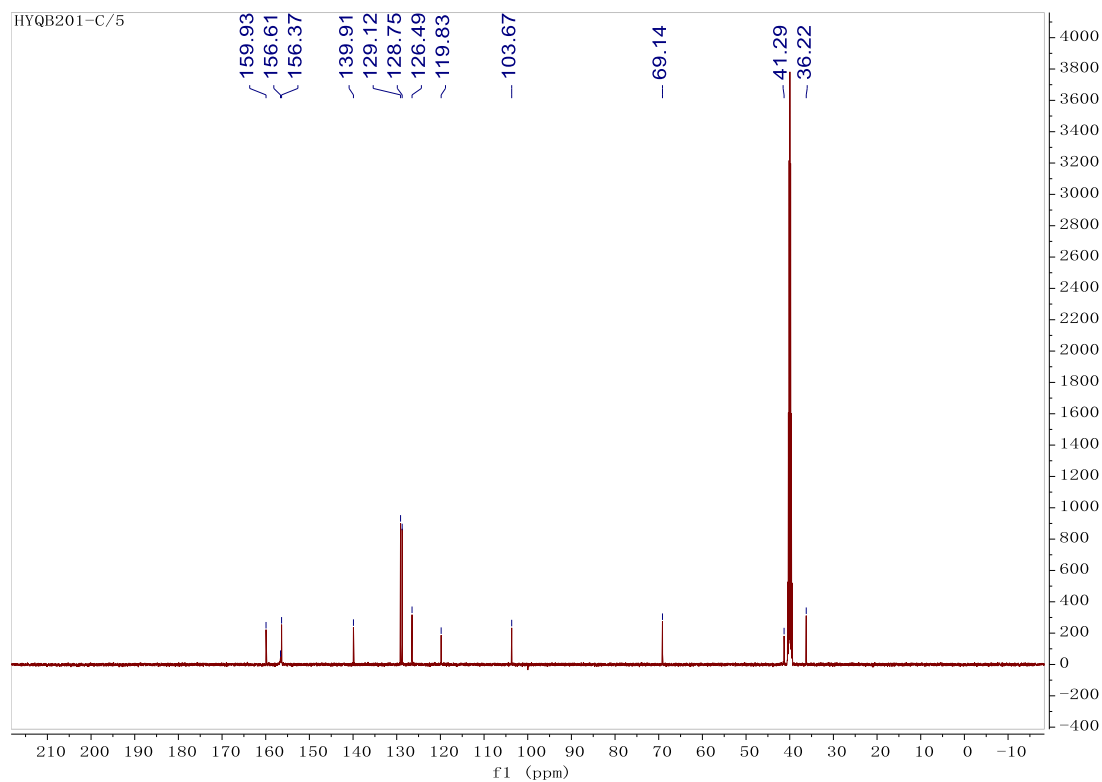

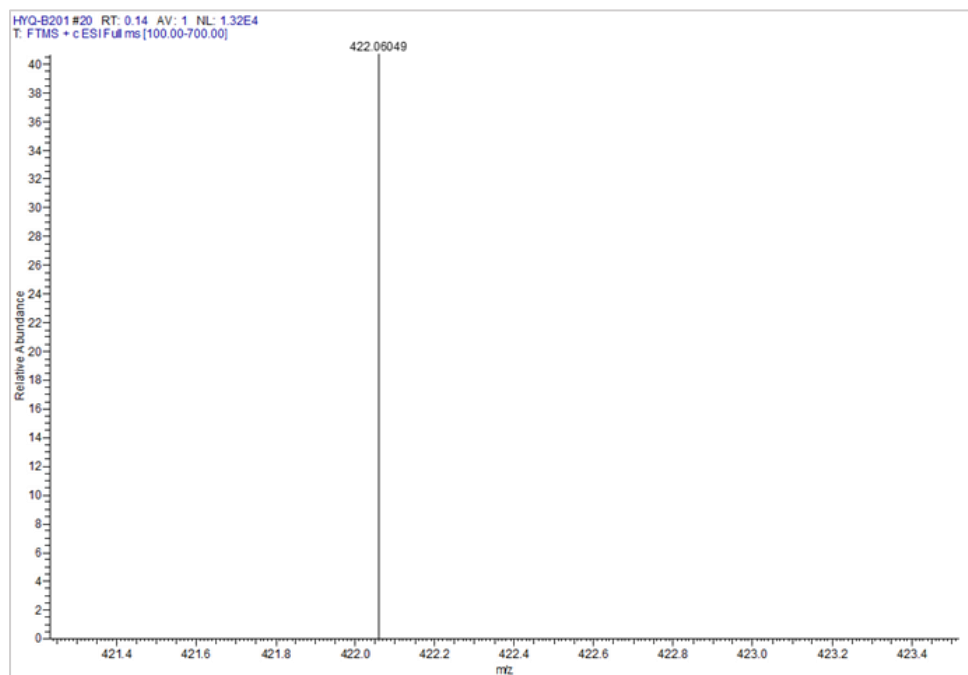

## Compound 10

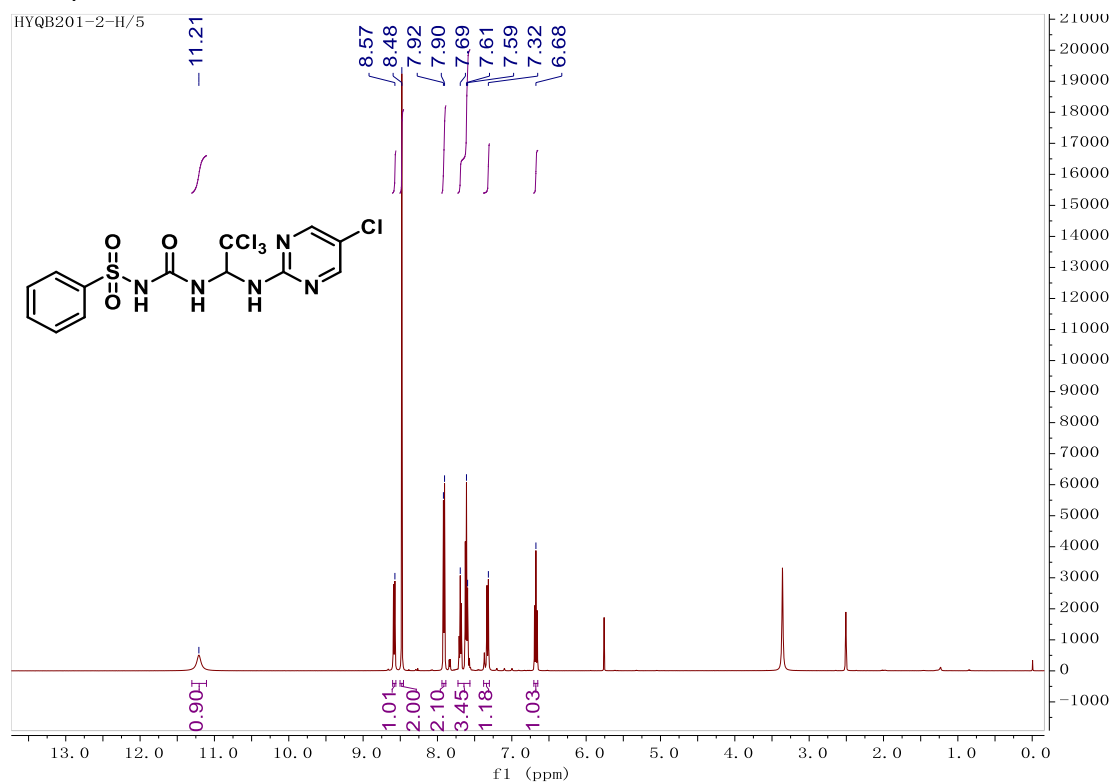

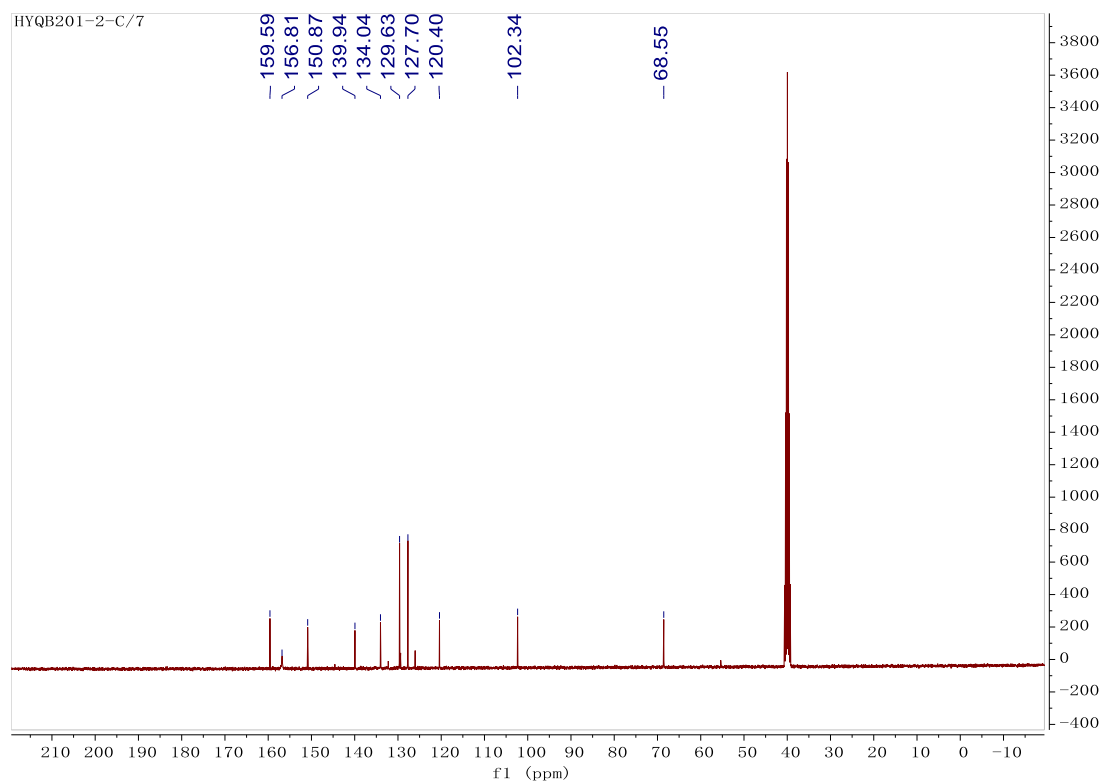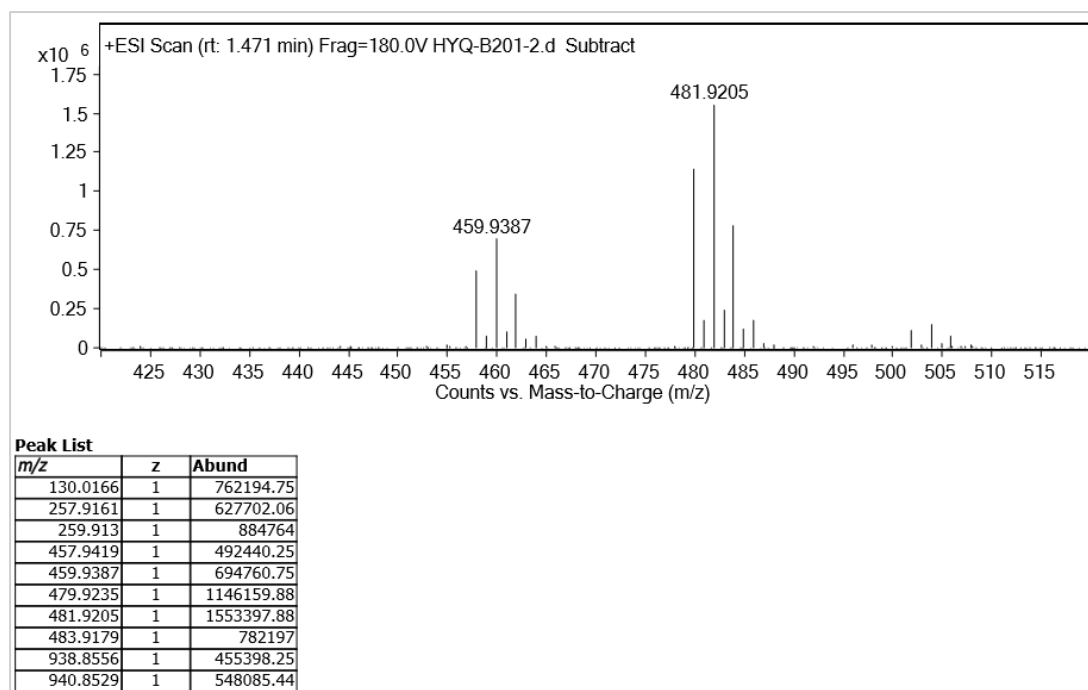



# Compound 11

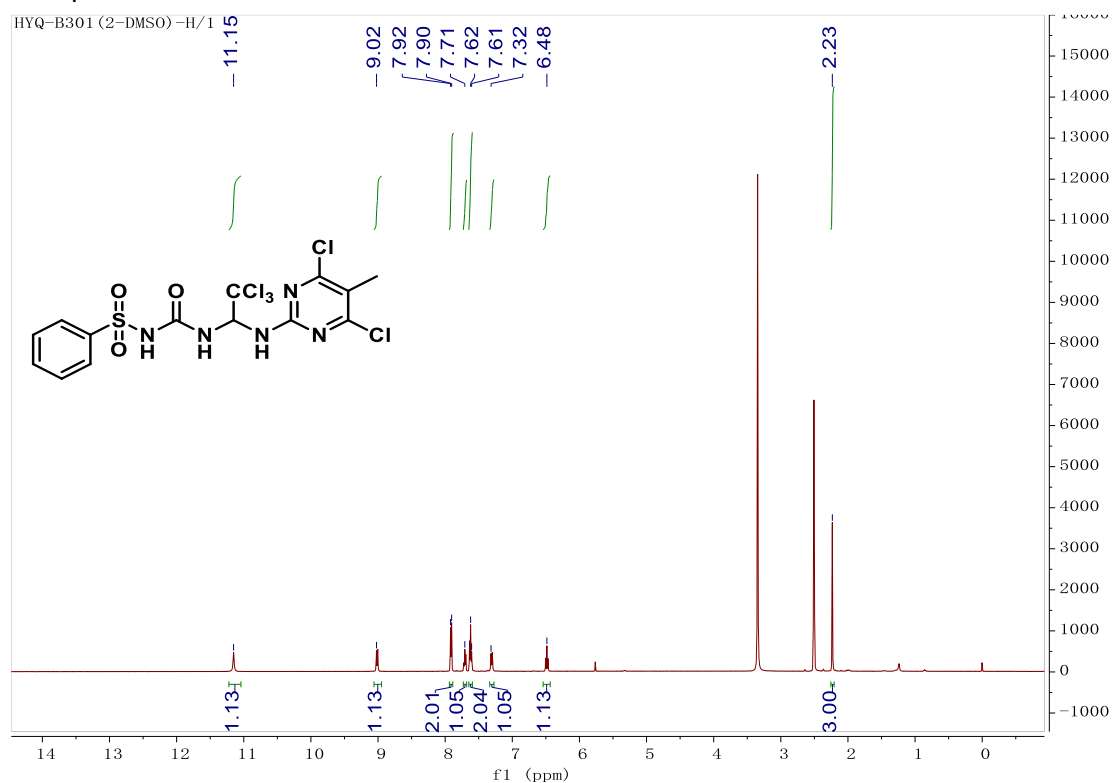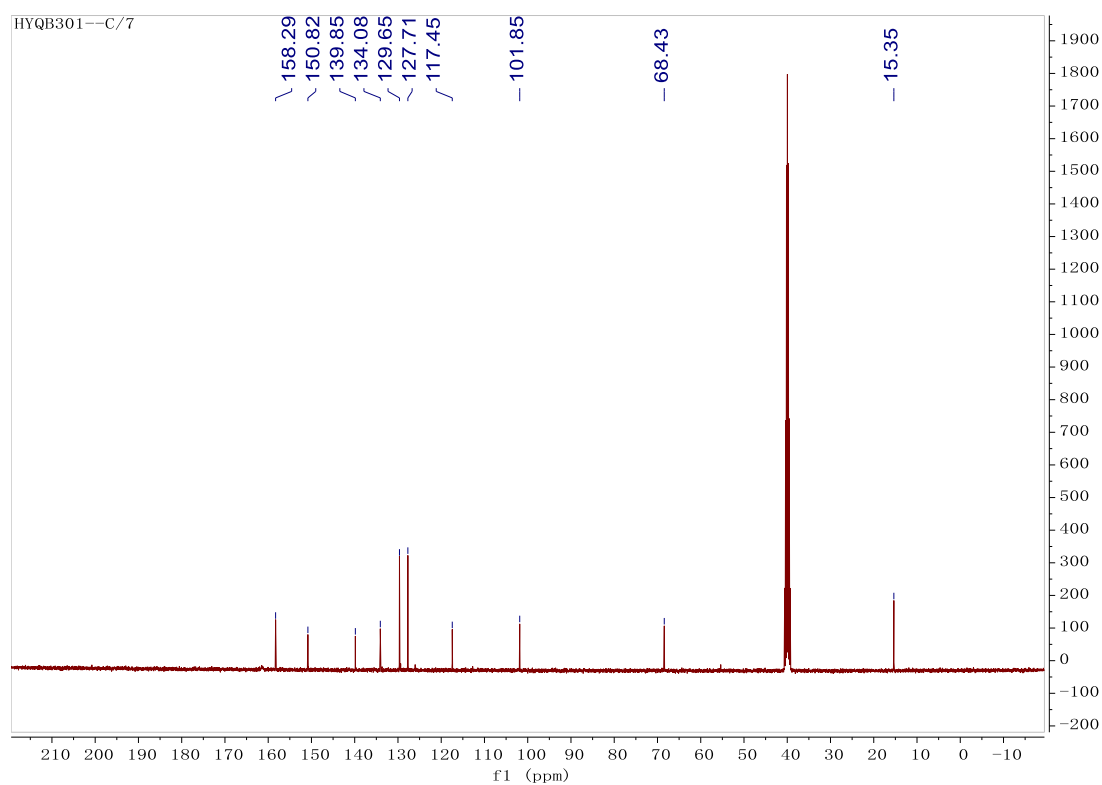

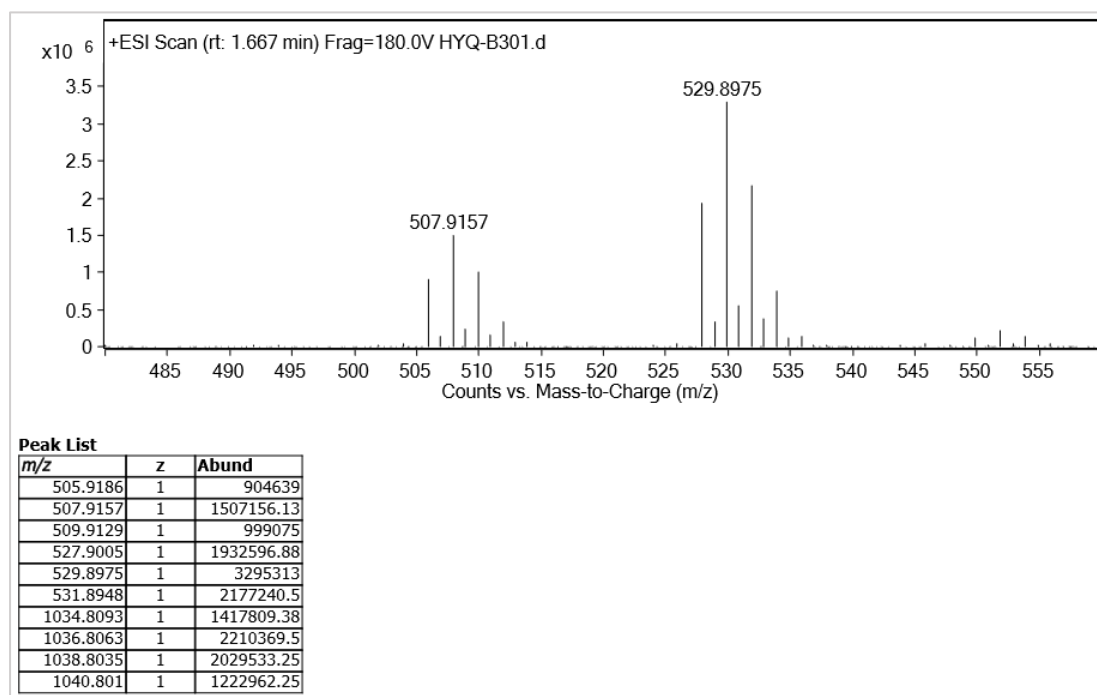

## Compound 12

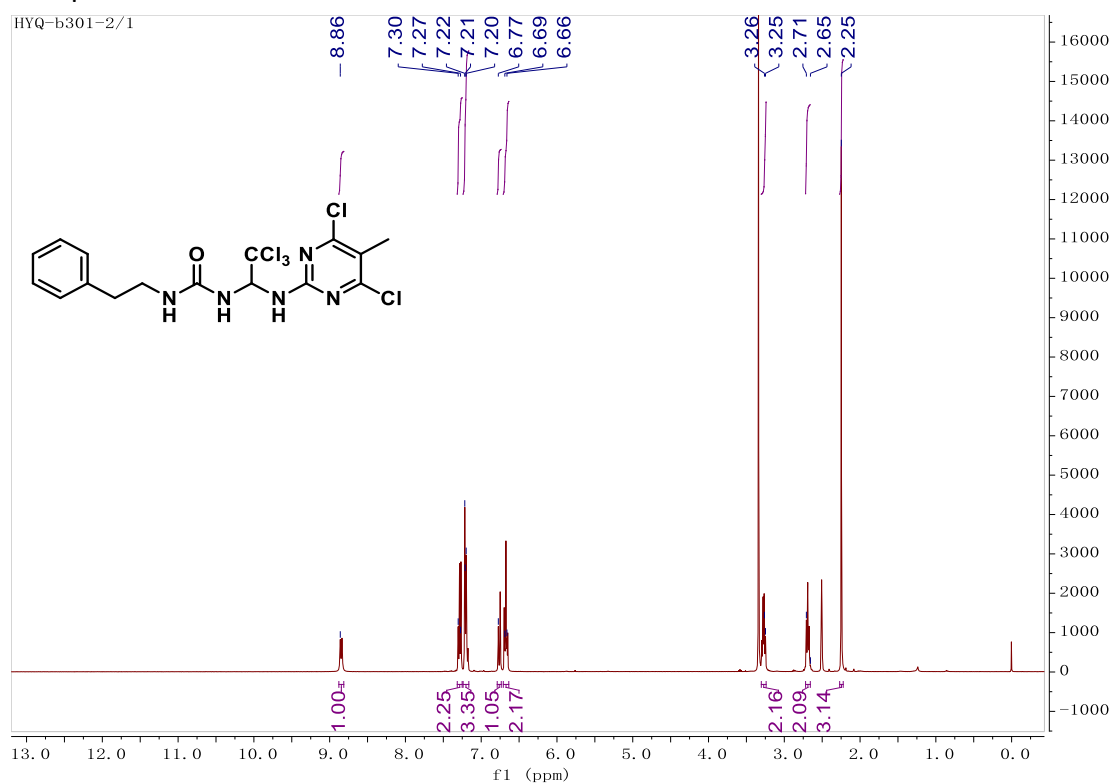

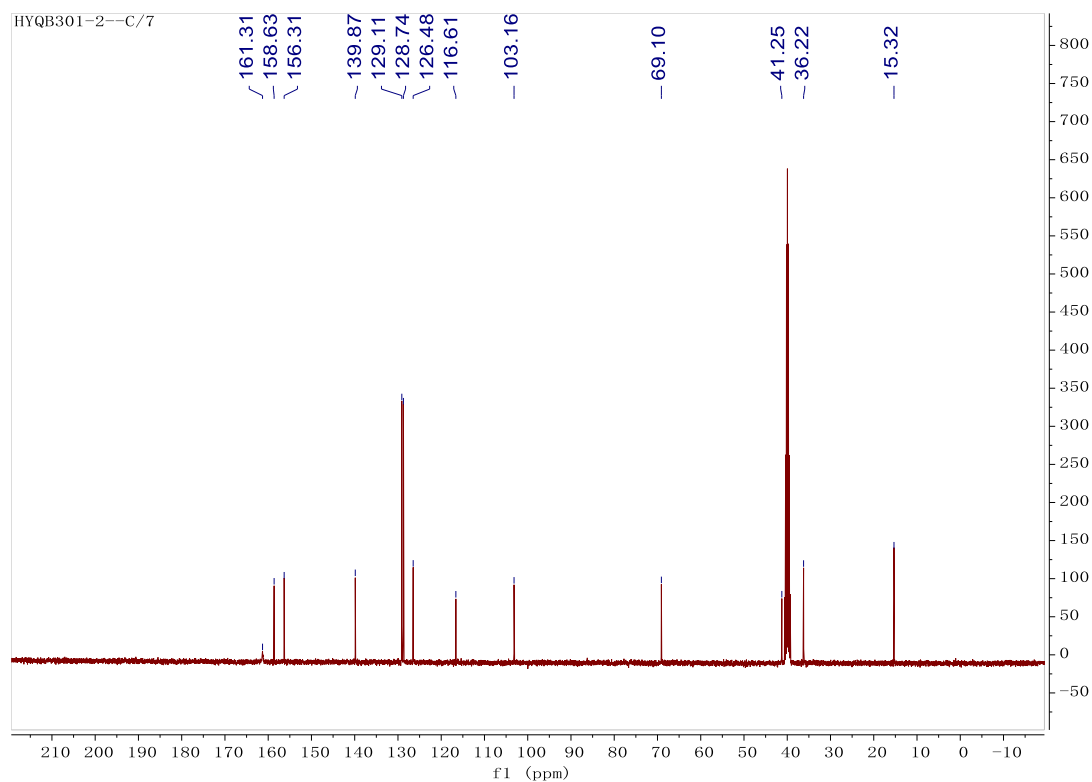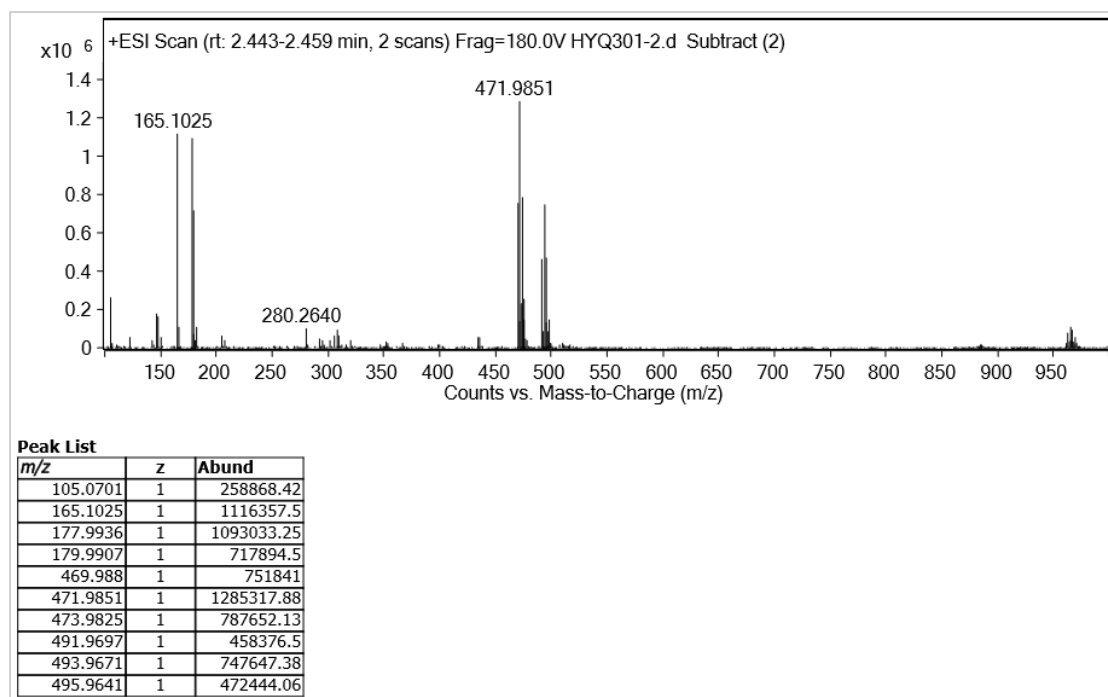

# Compound 13

HYQB401-H-DMSO/2

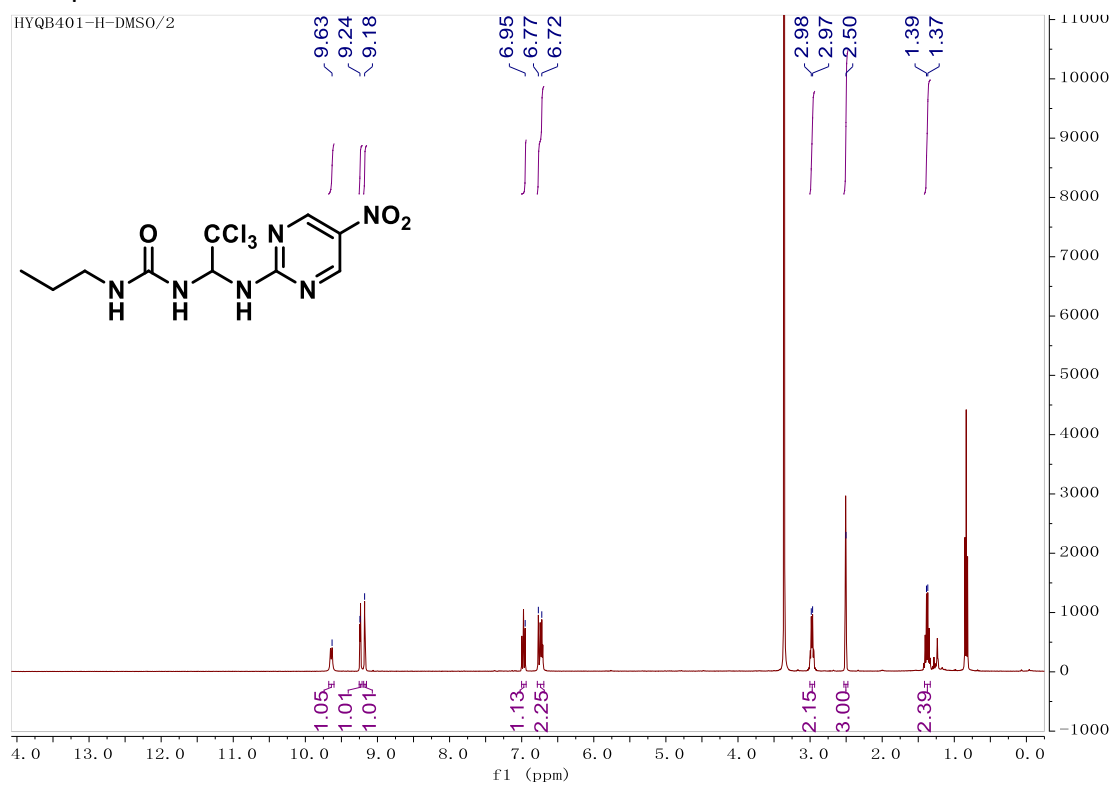

HYQB401-C/5

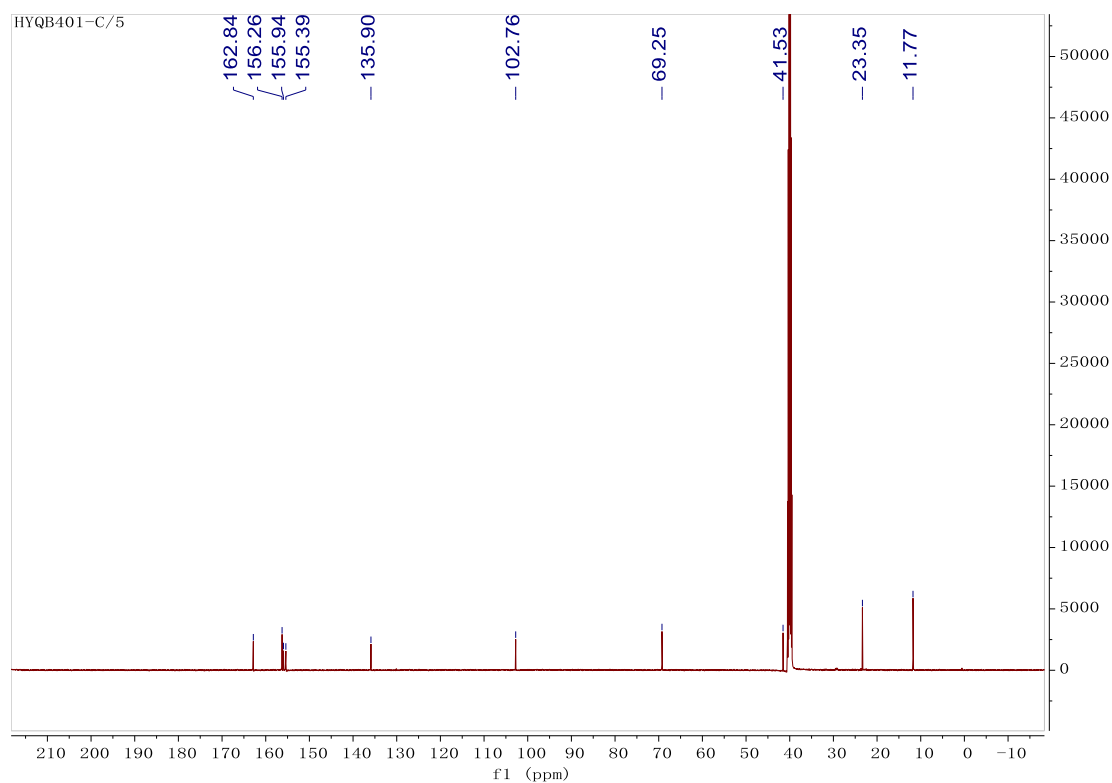

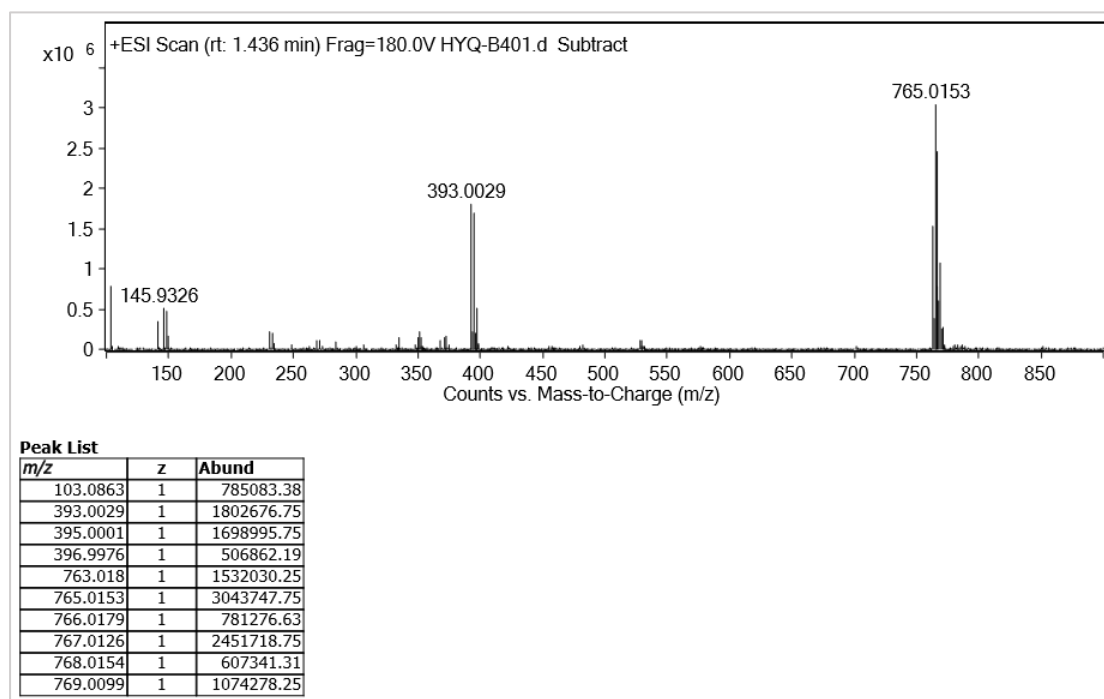

## Compound 14

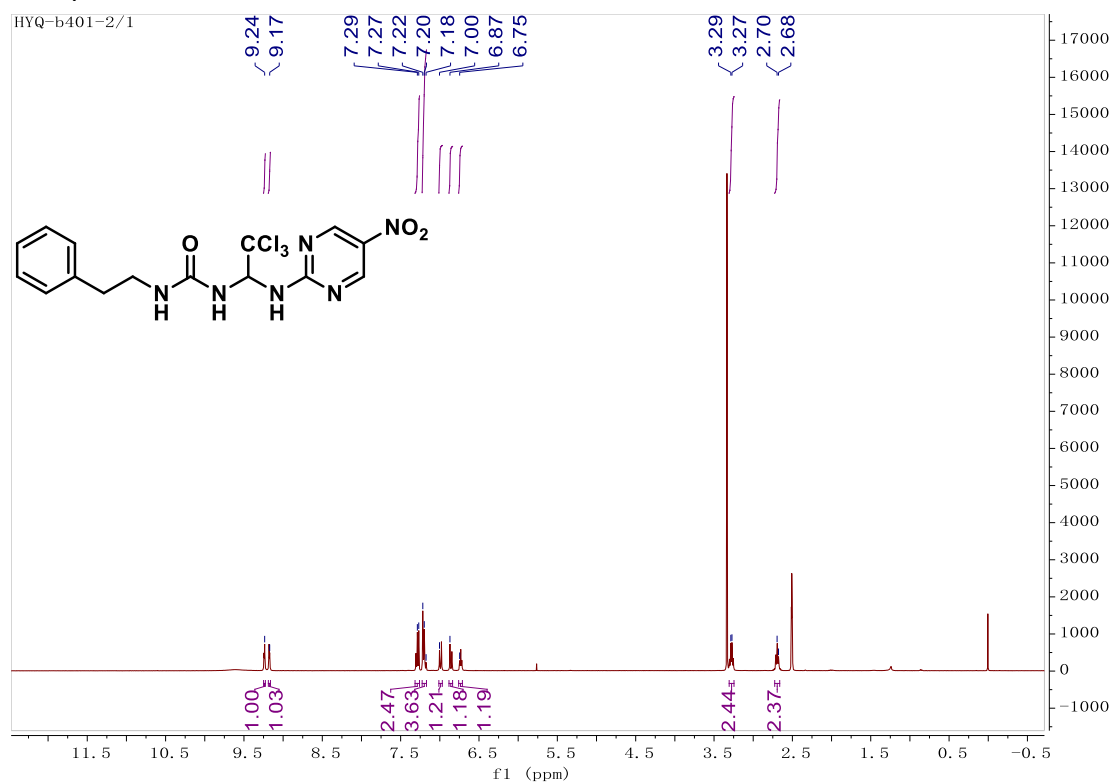

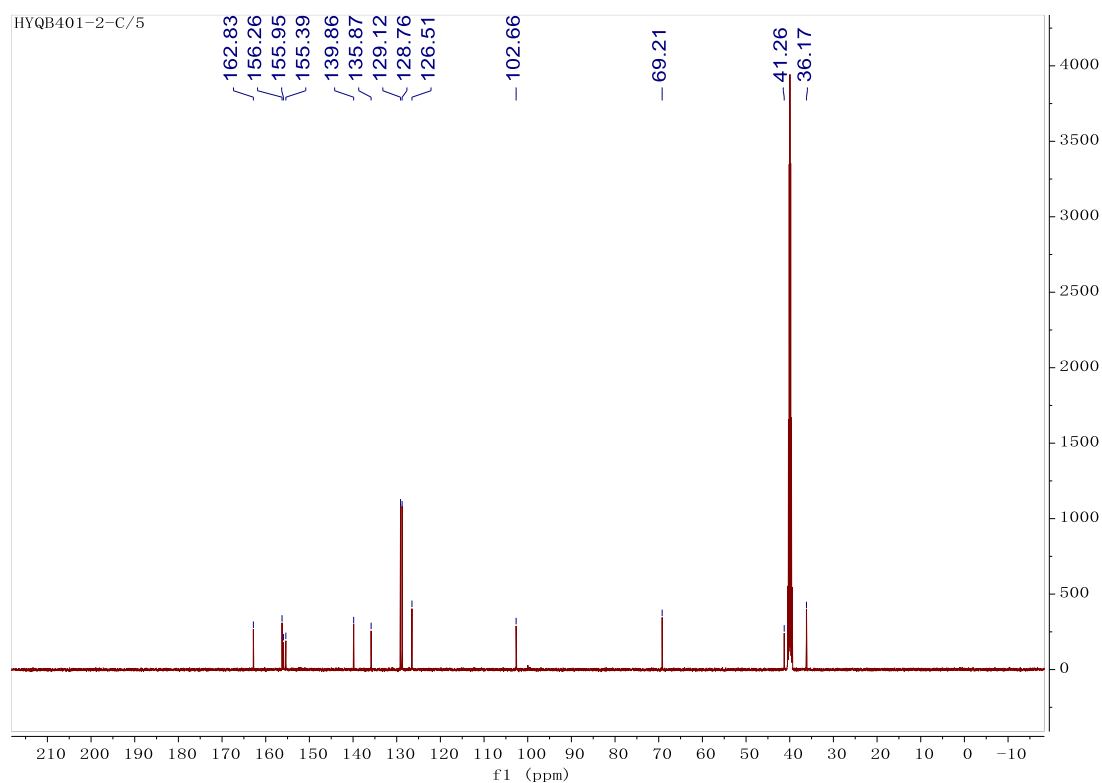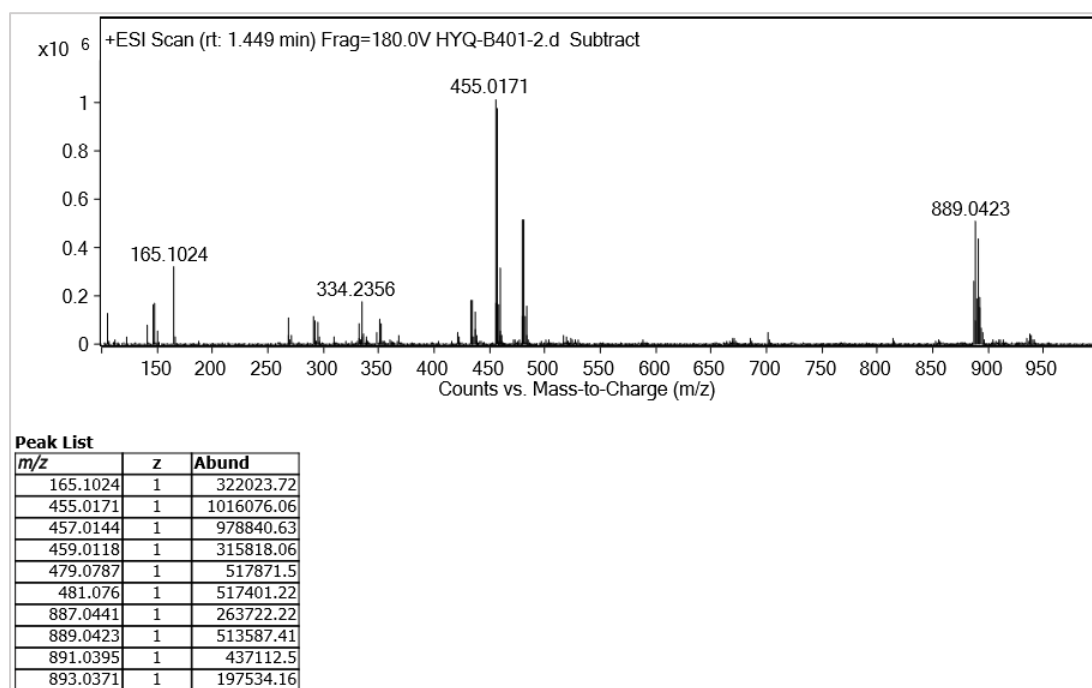

# Compound 15

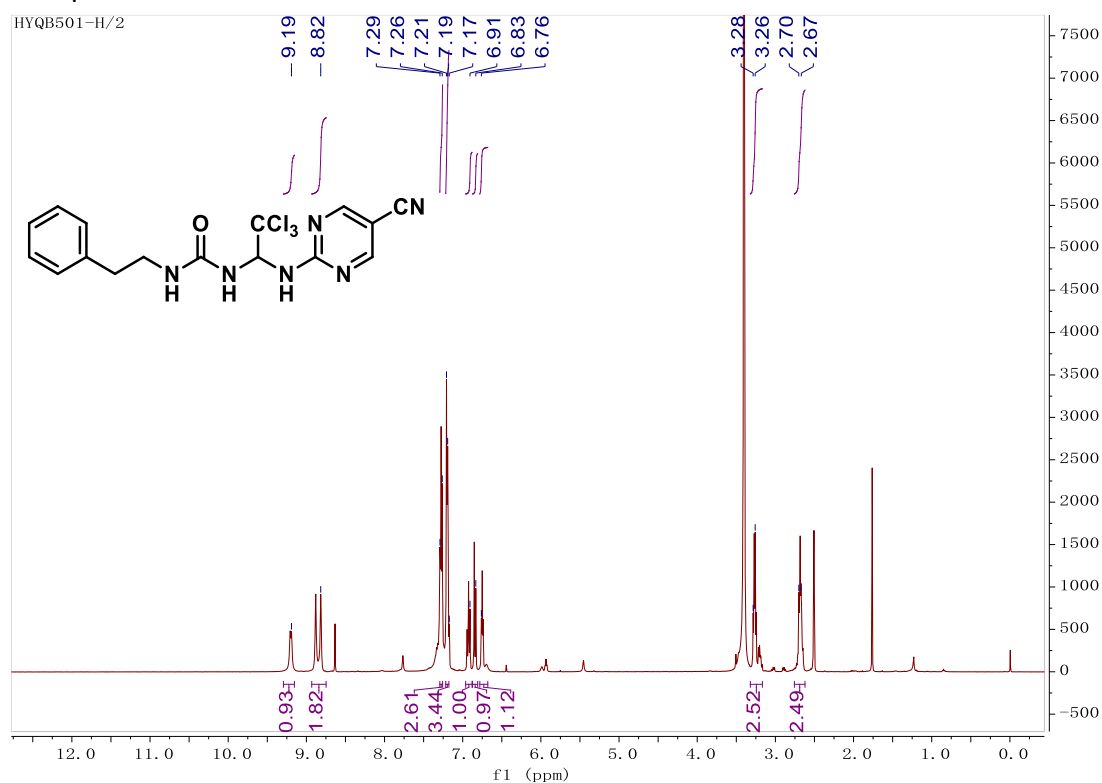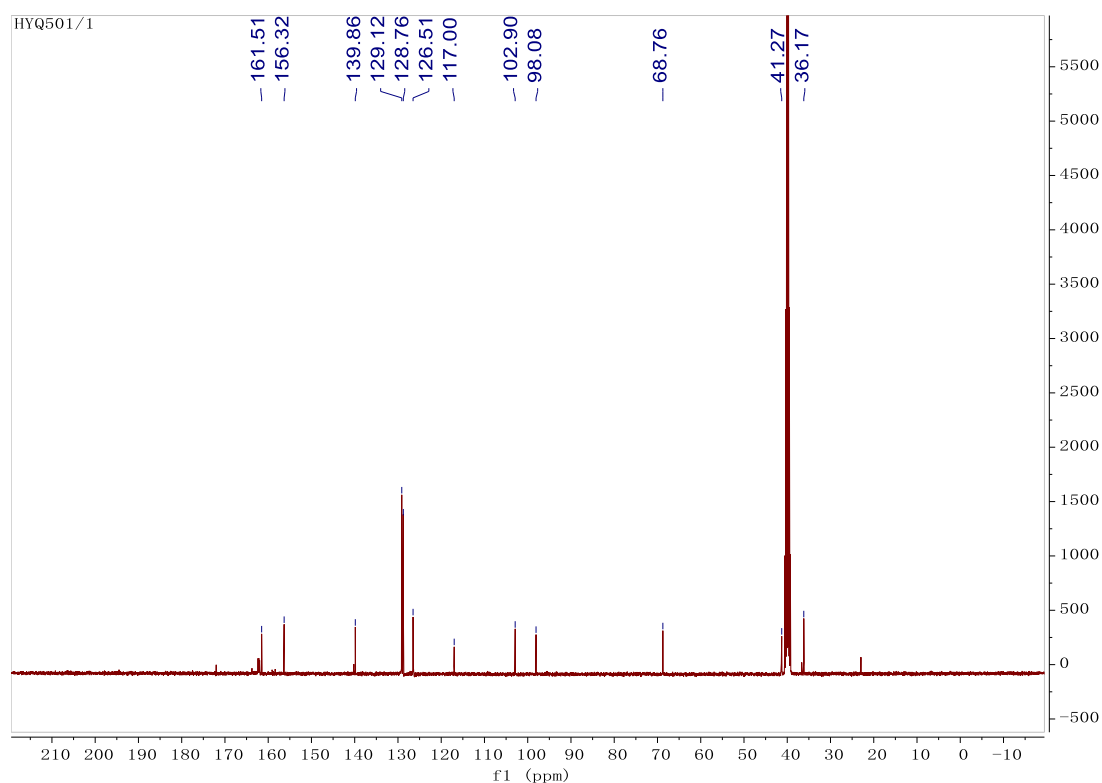

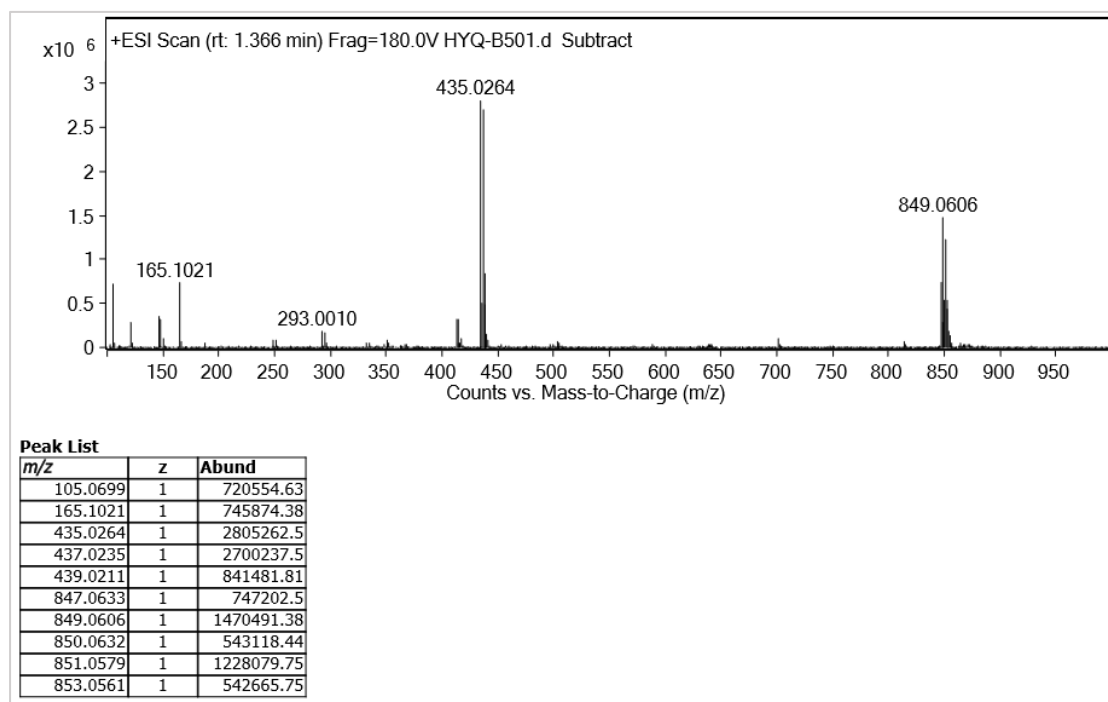

## Compound 16

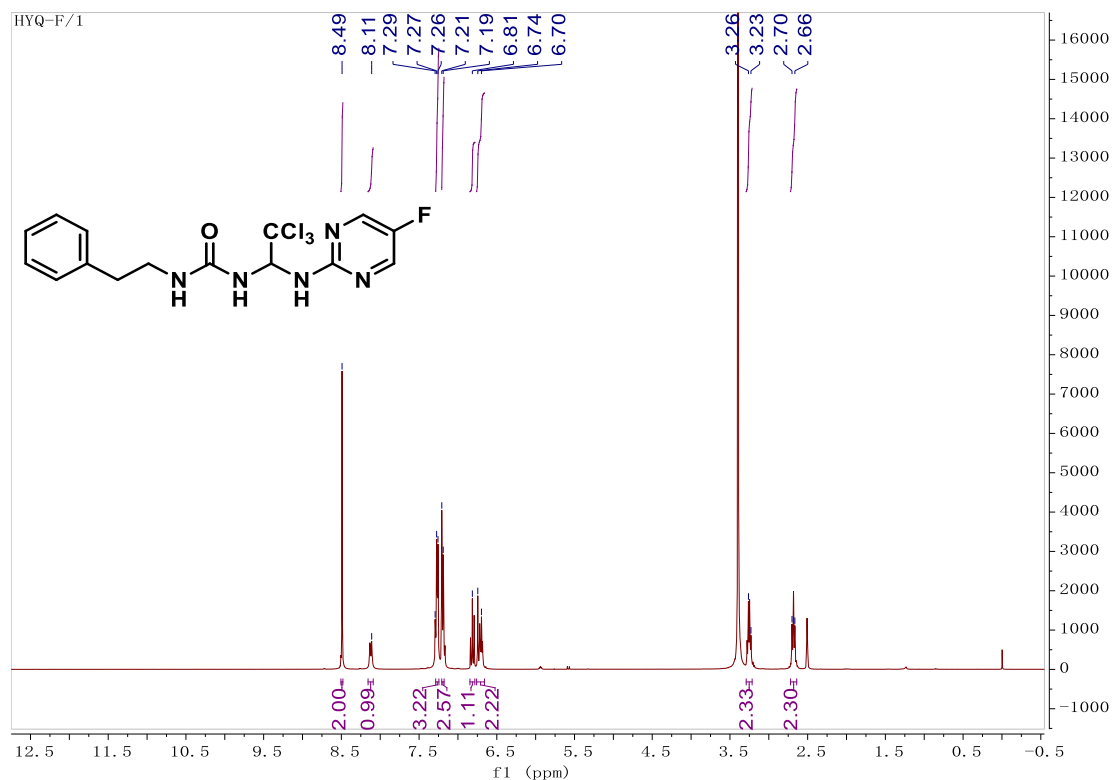



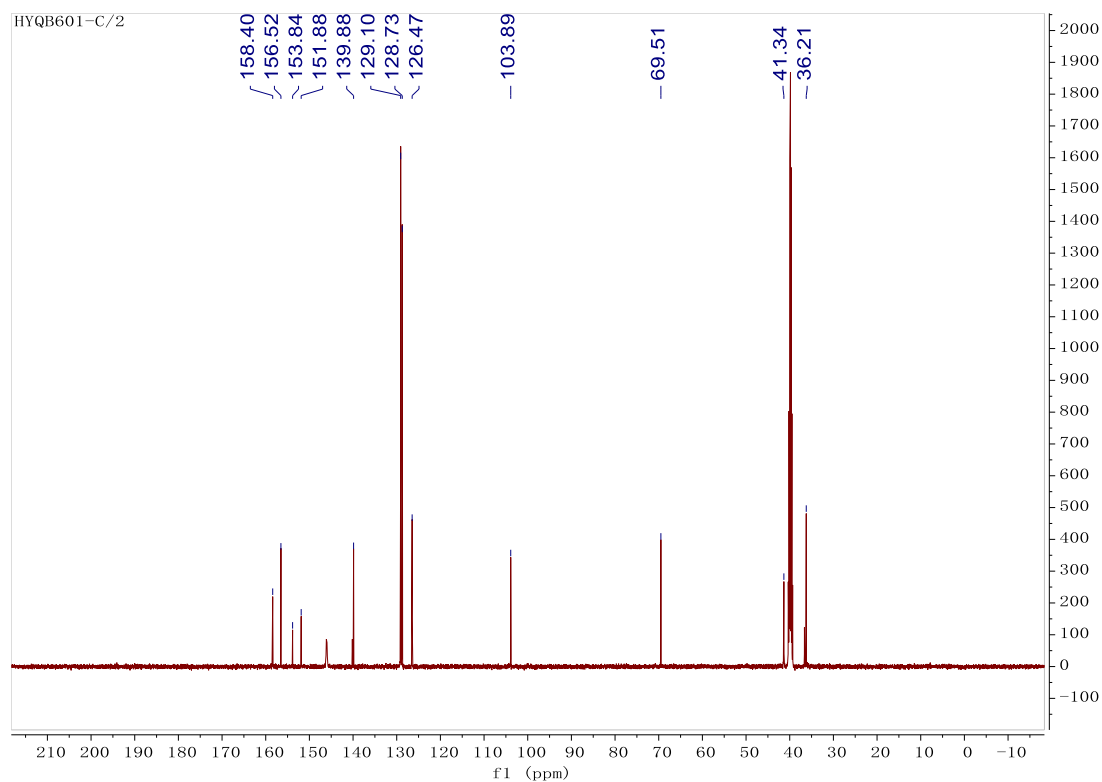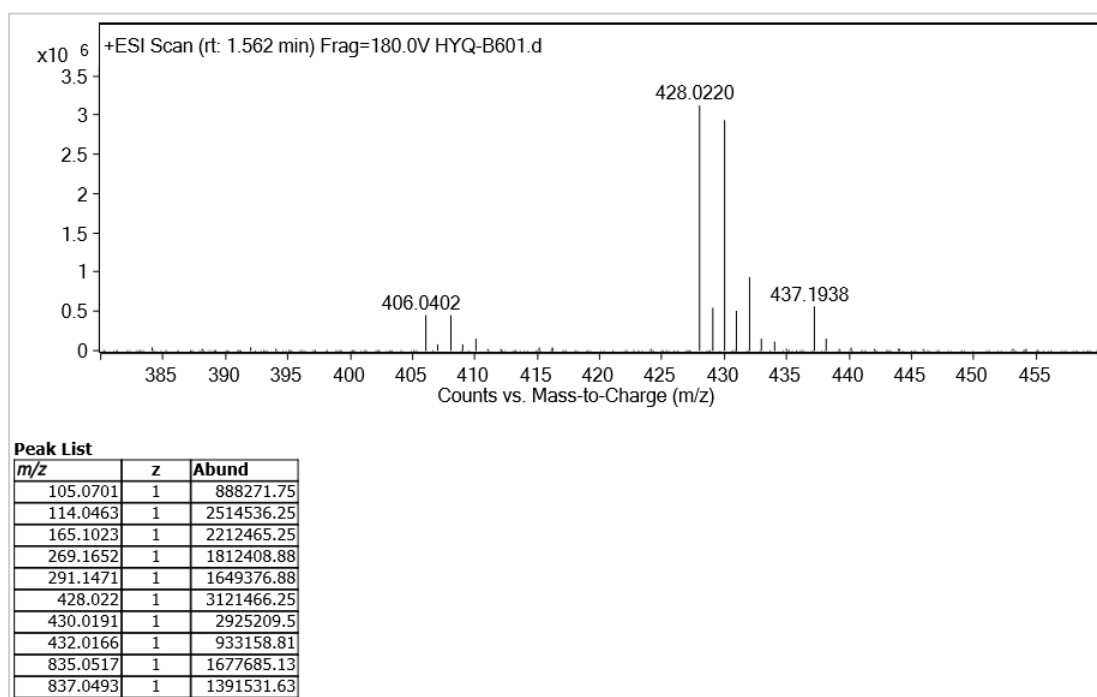

# Compound 17

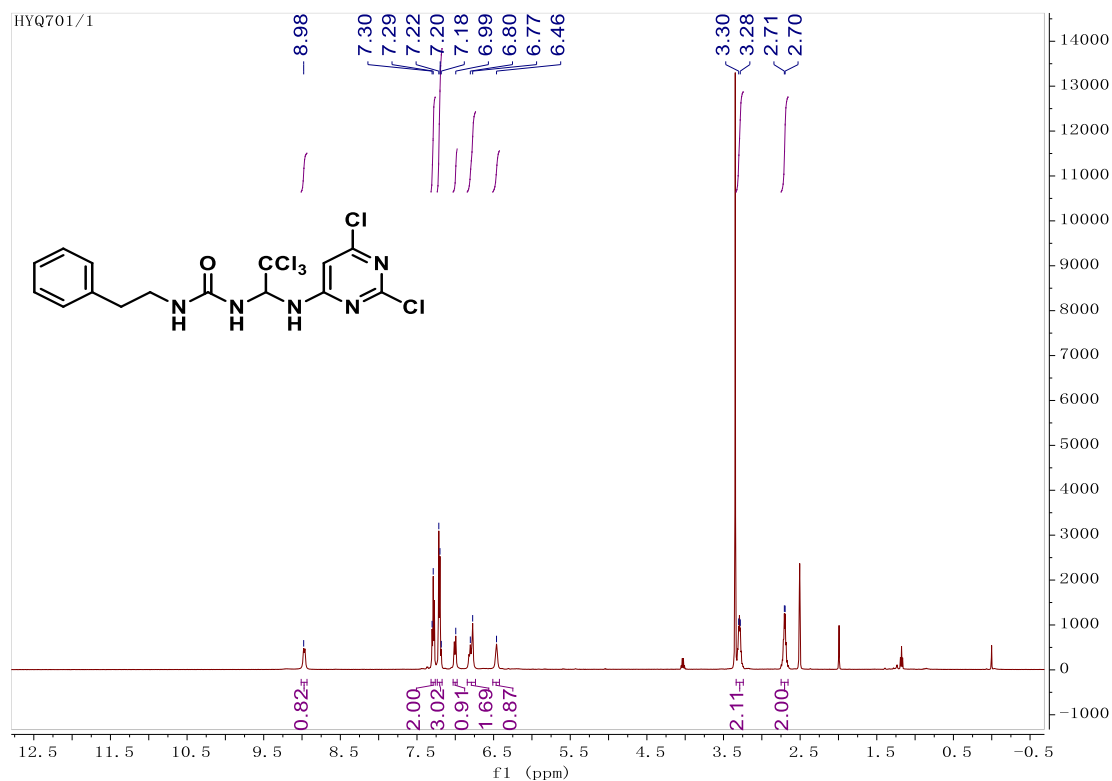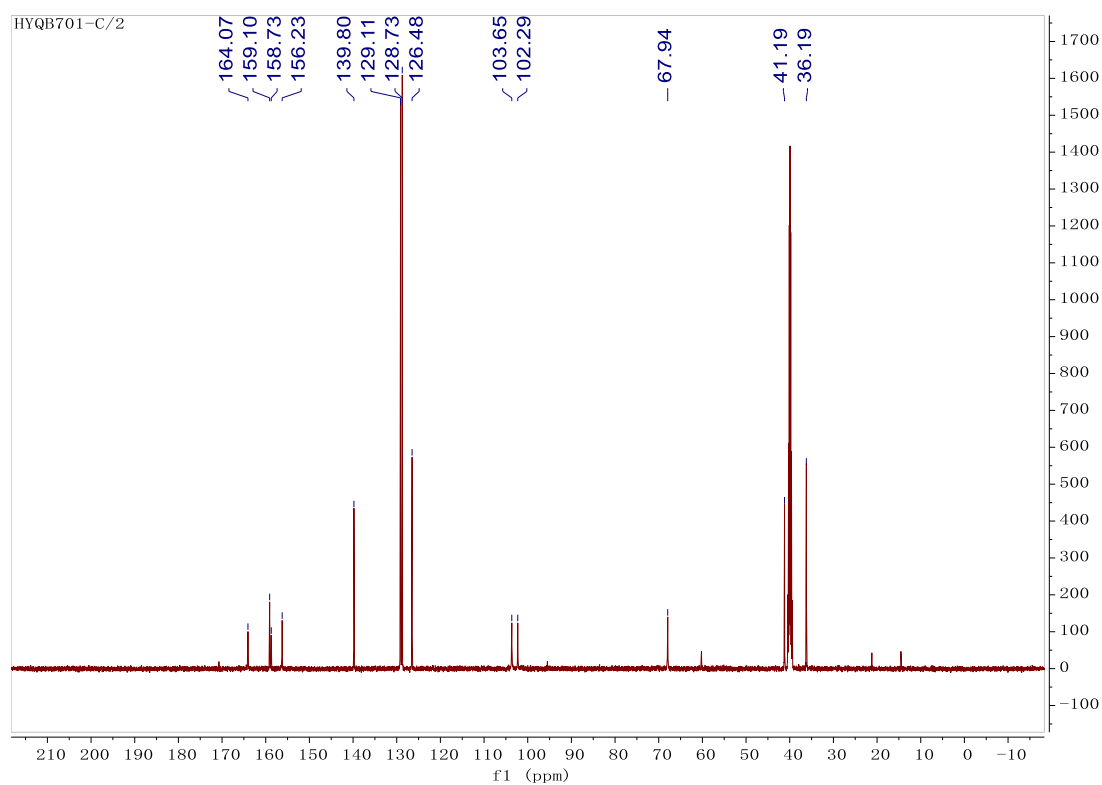

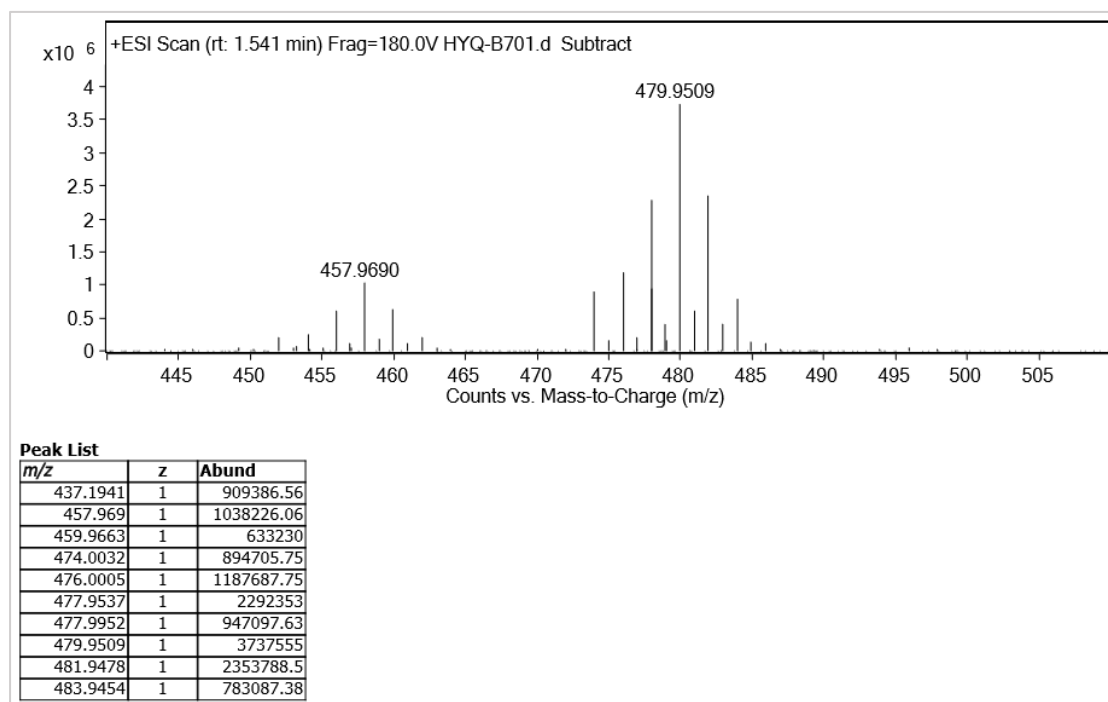

## Compound 18

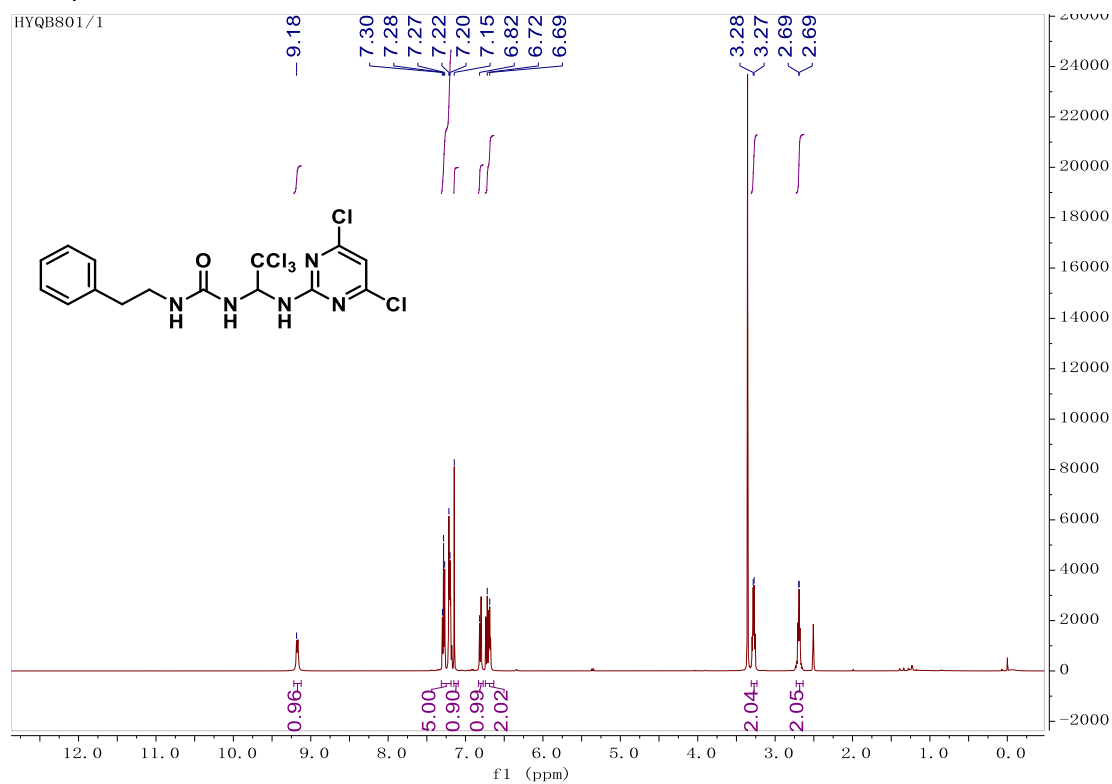

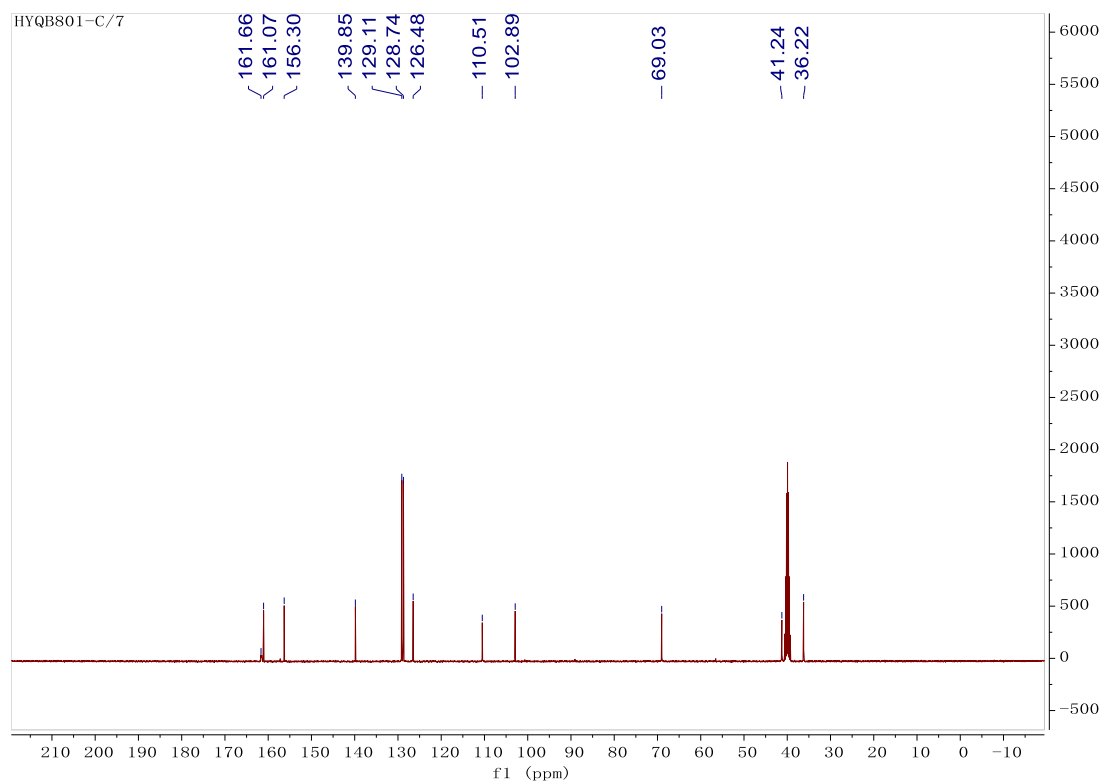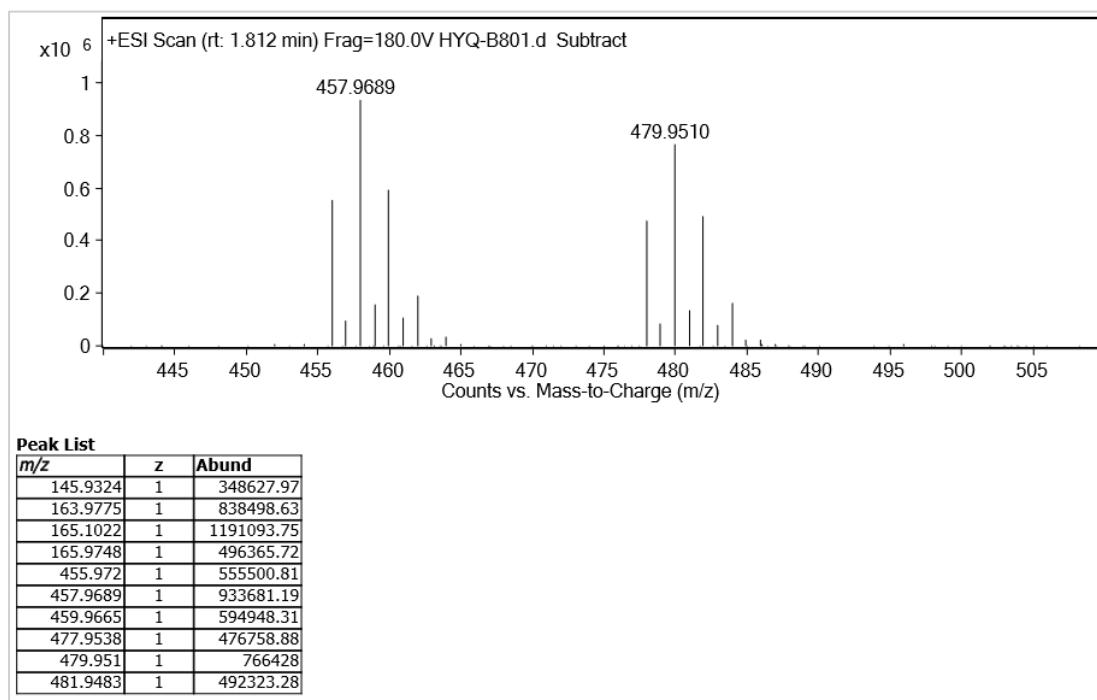

# Compound 19

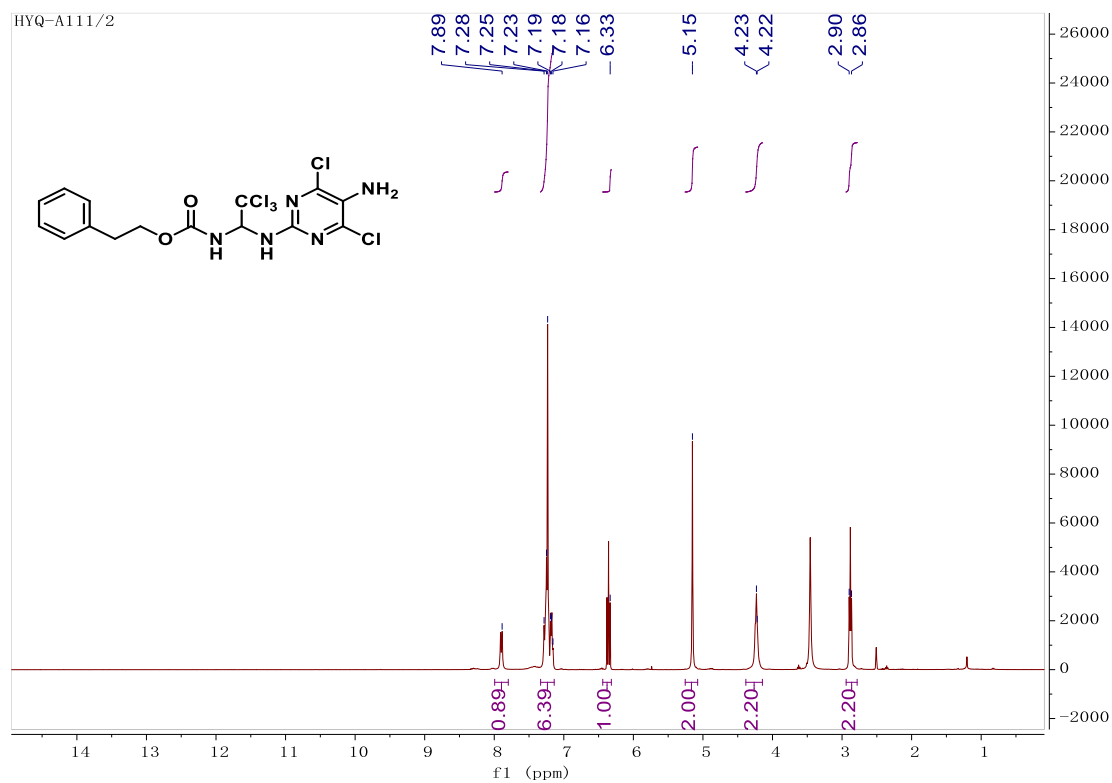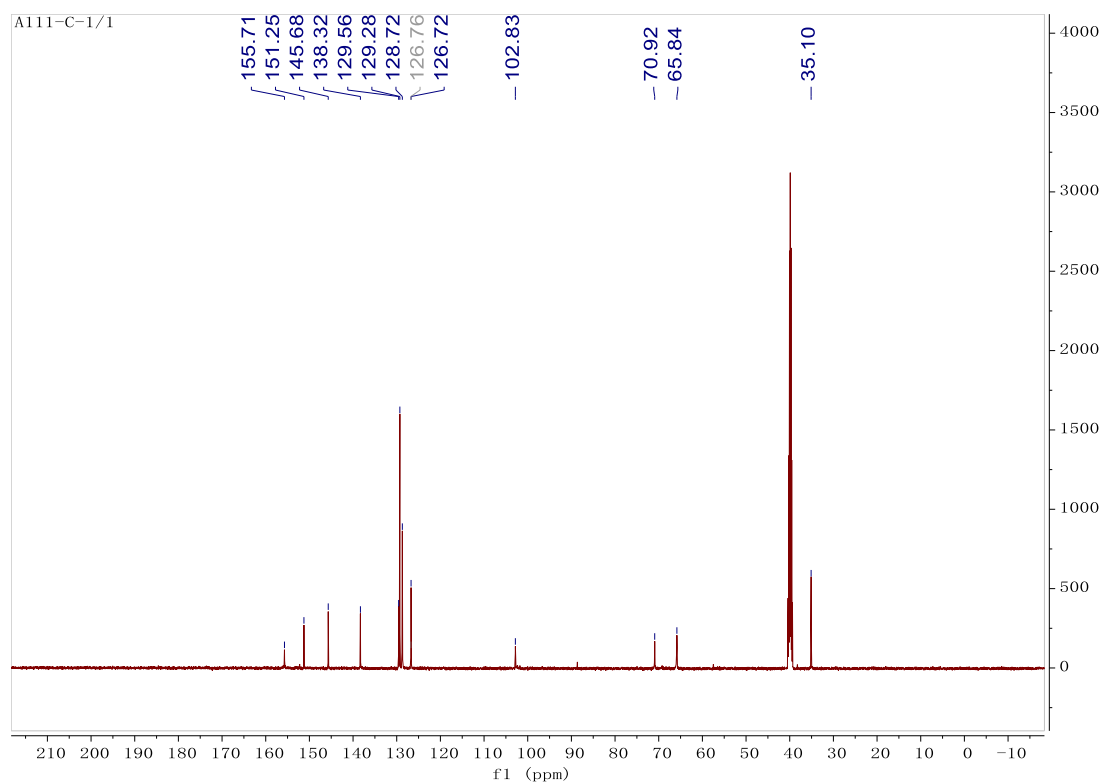

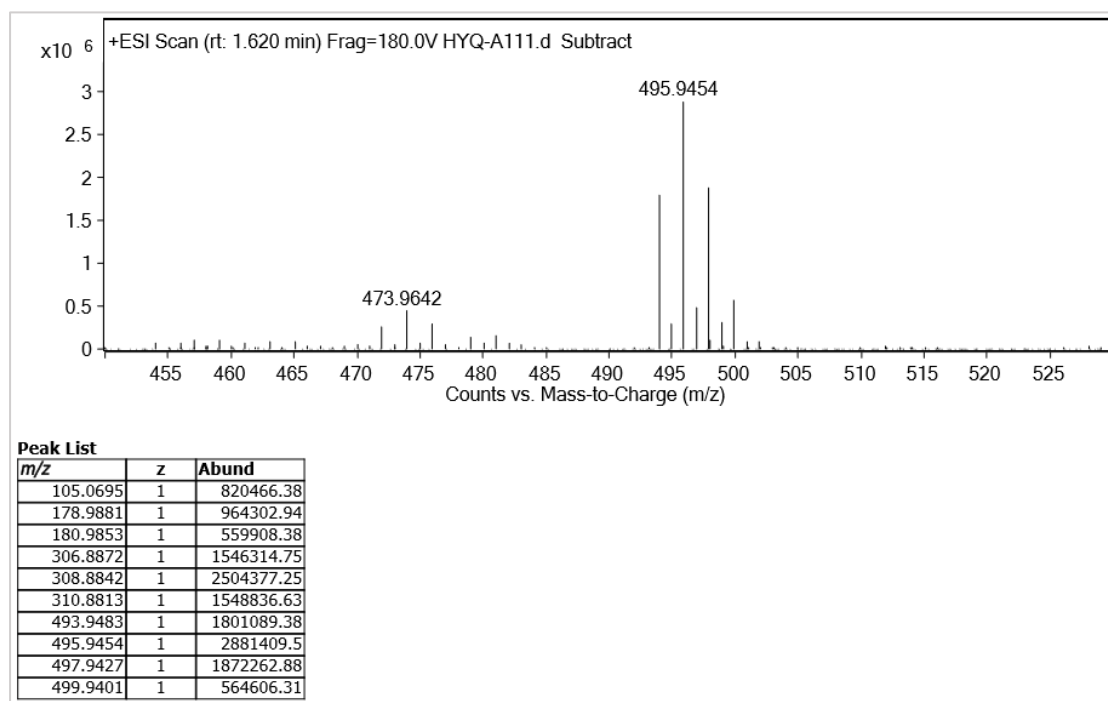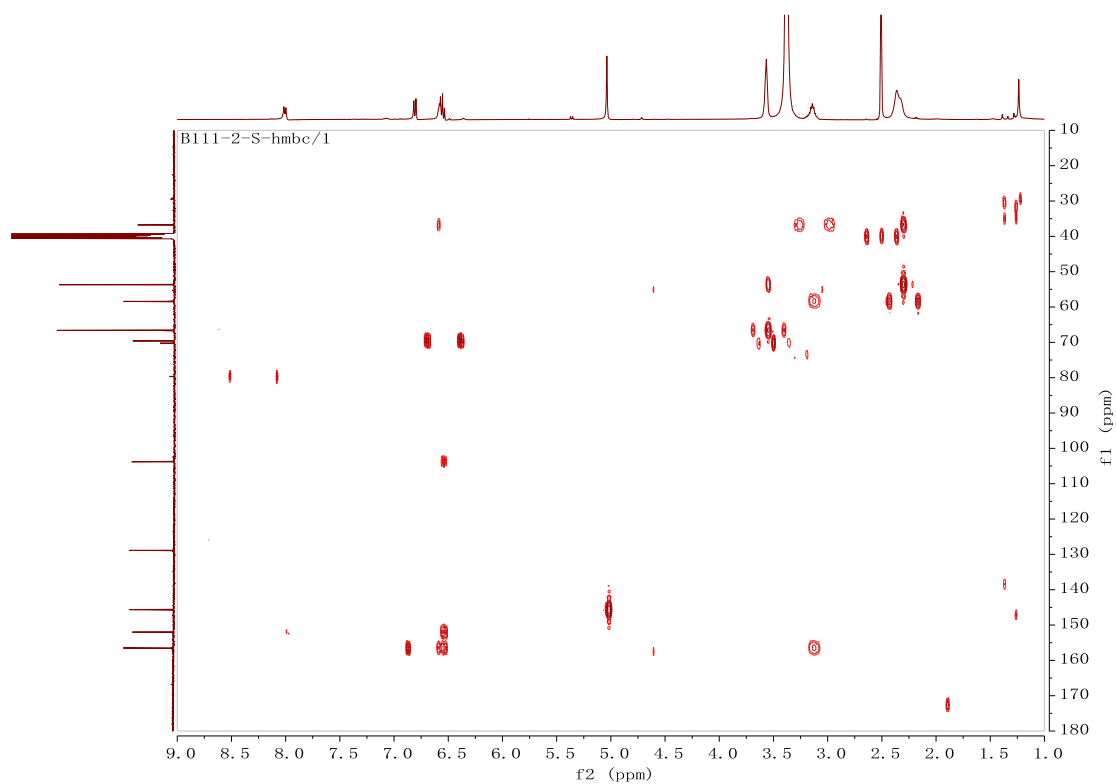

# Compound 20

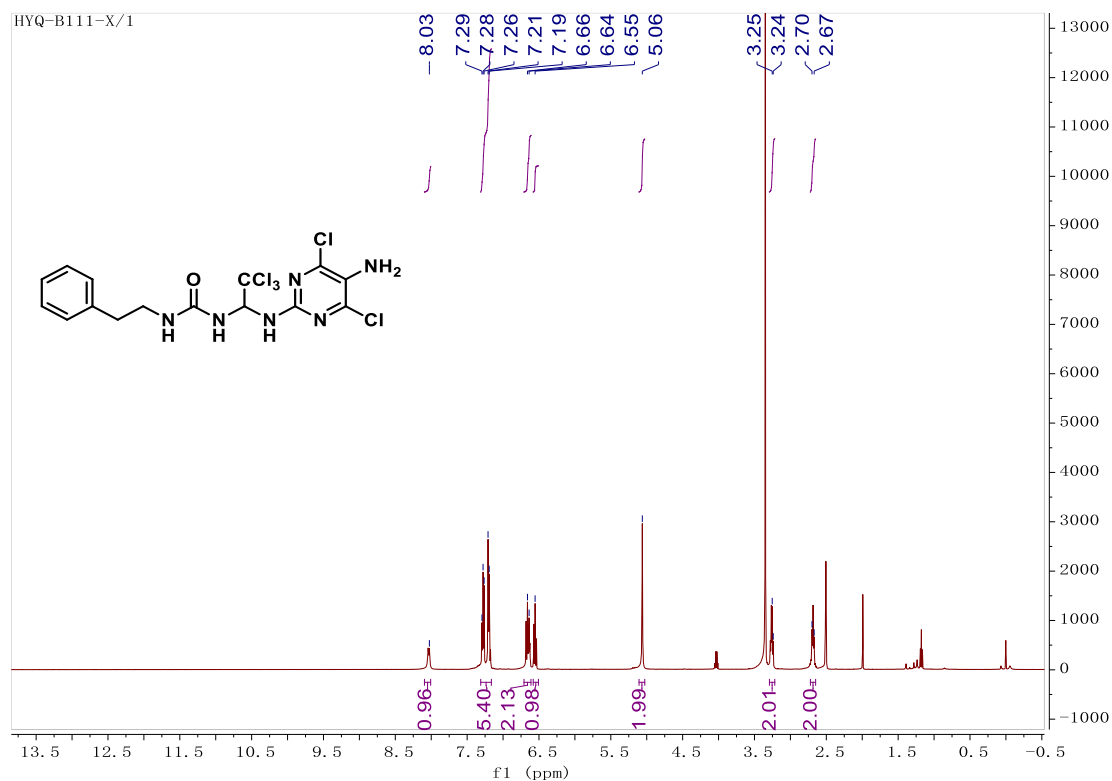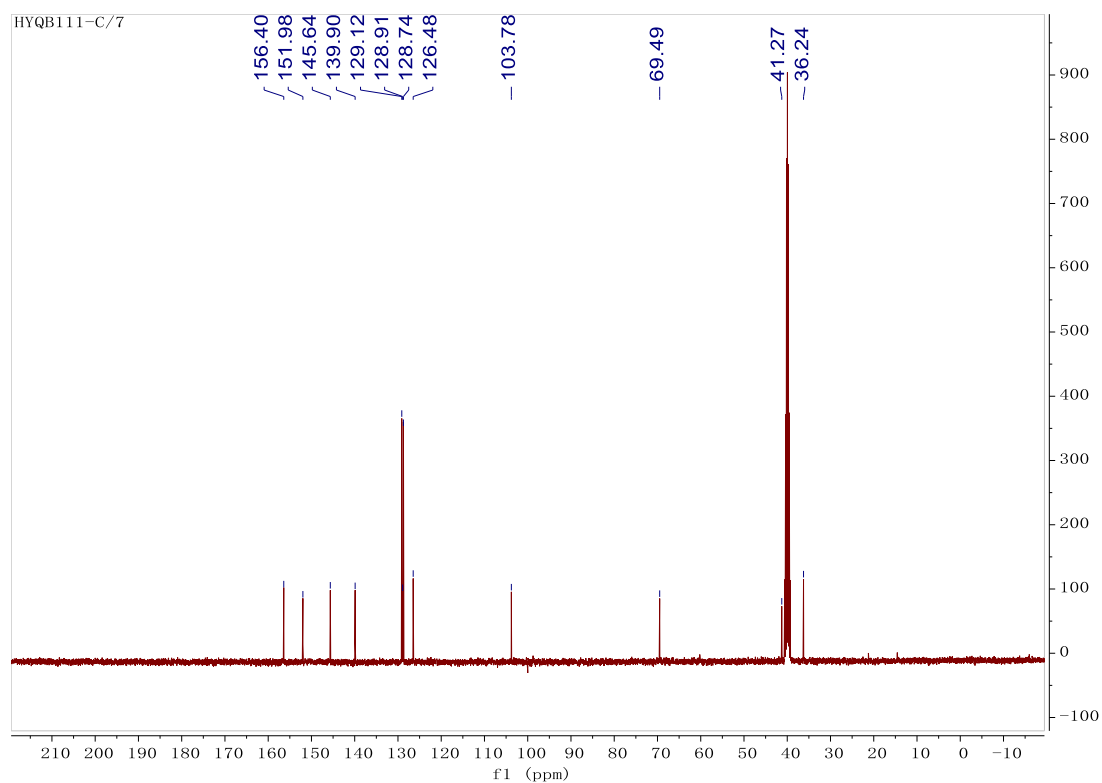

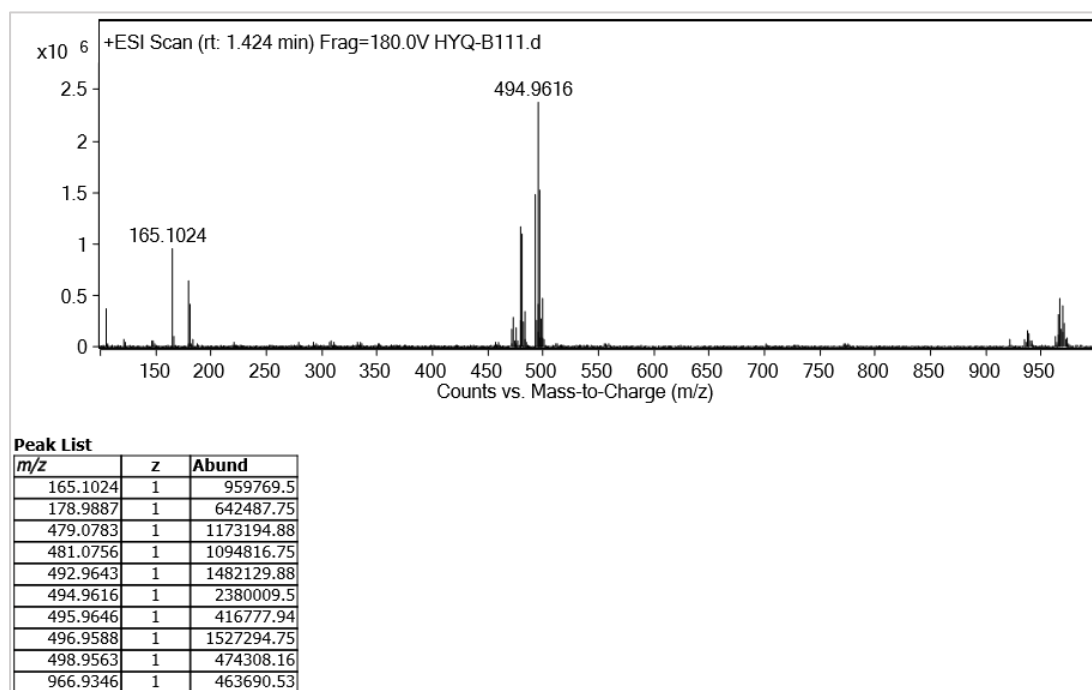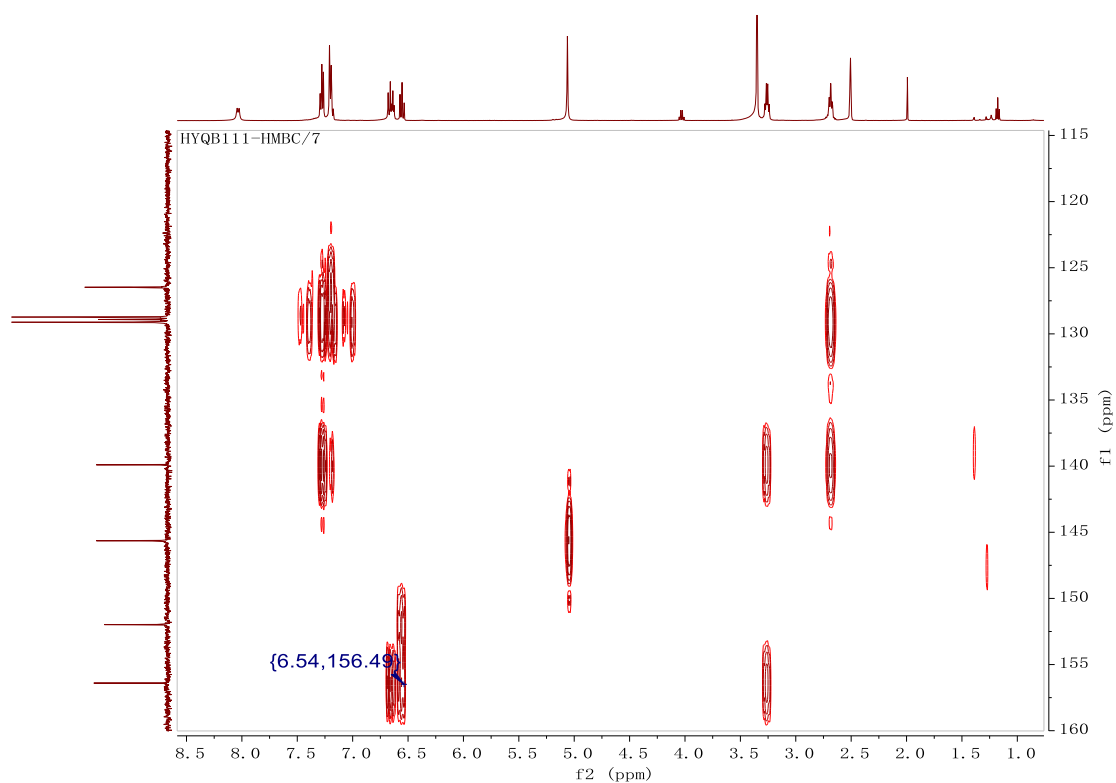



# Compound 21

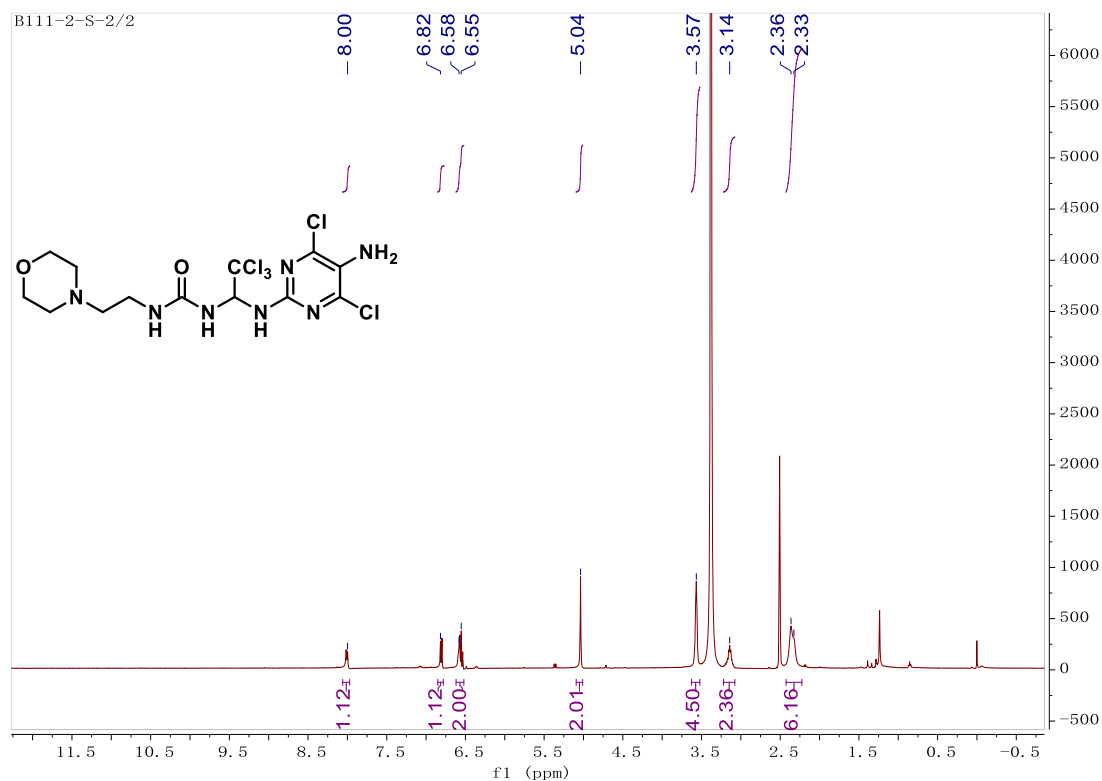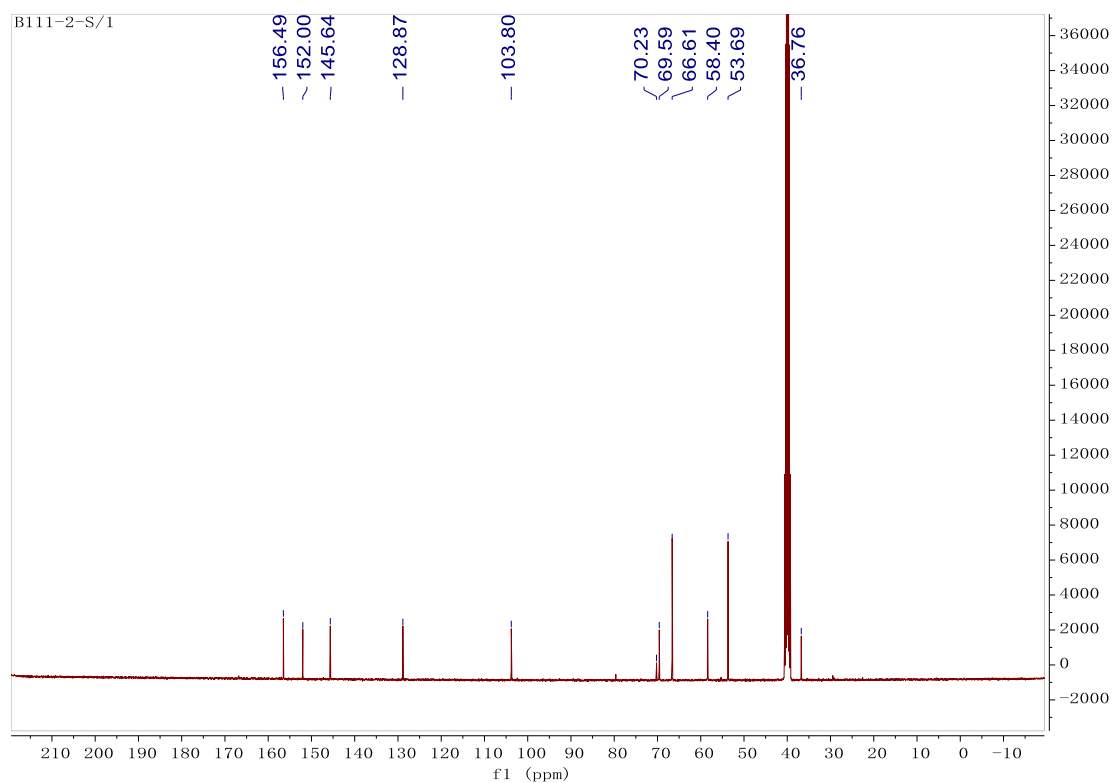

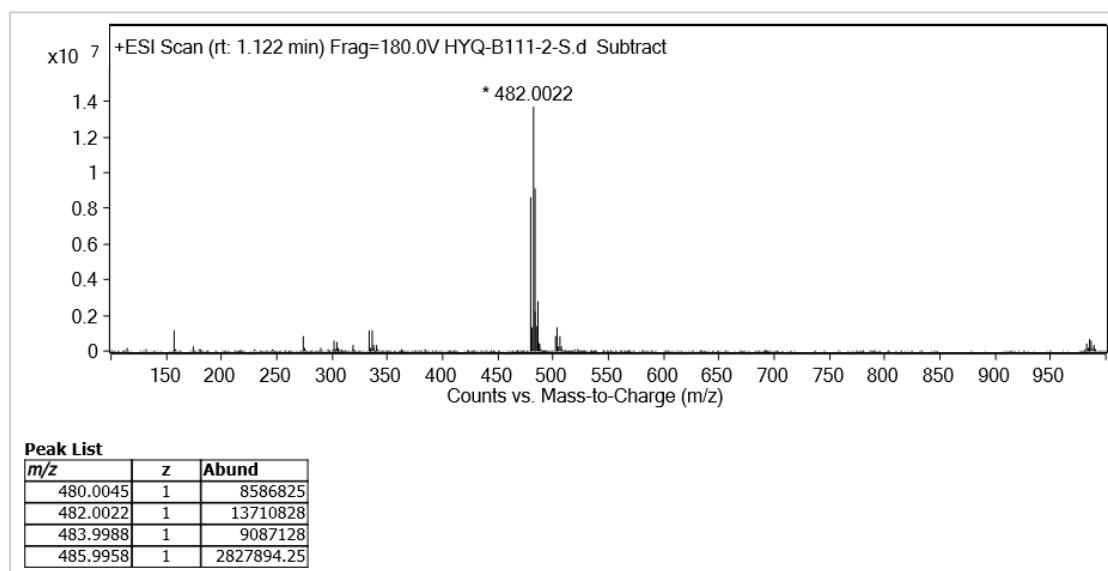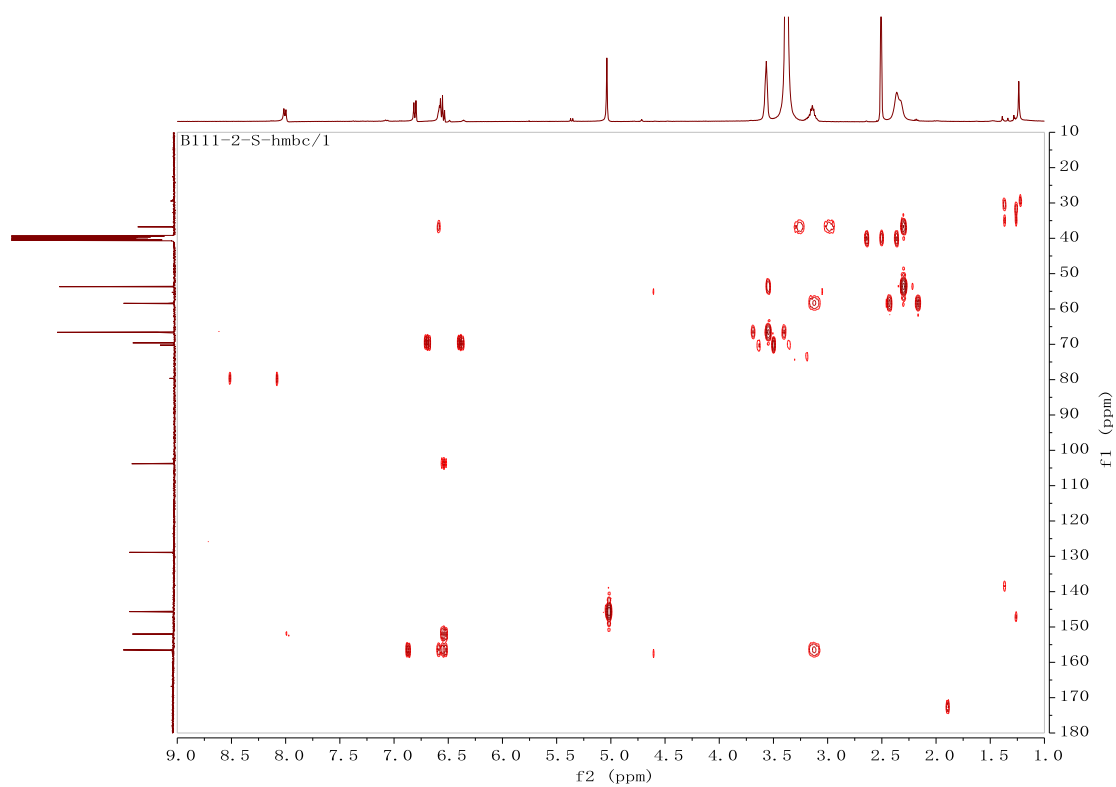

# Compound 22

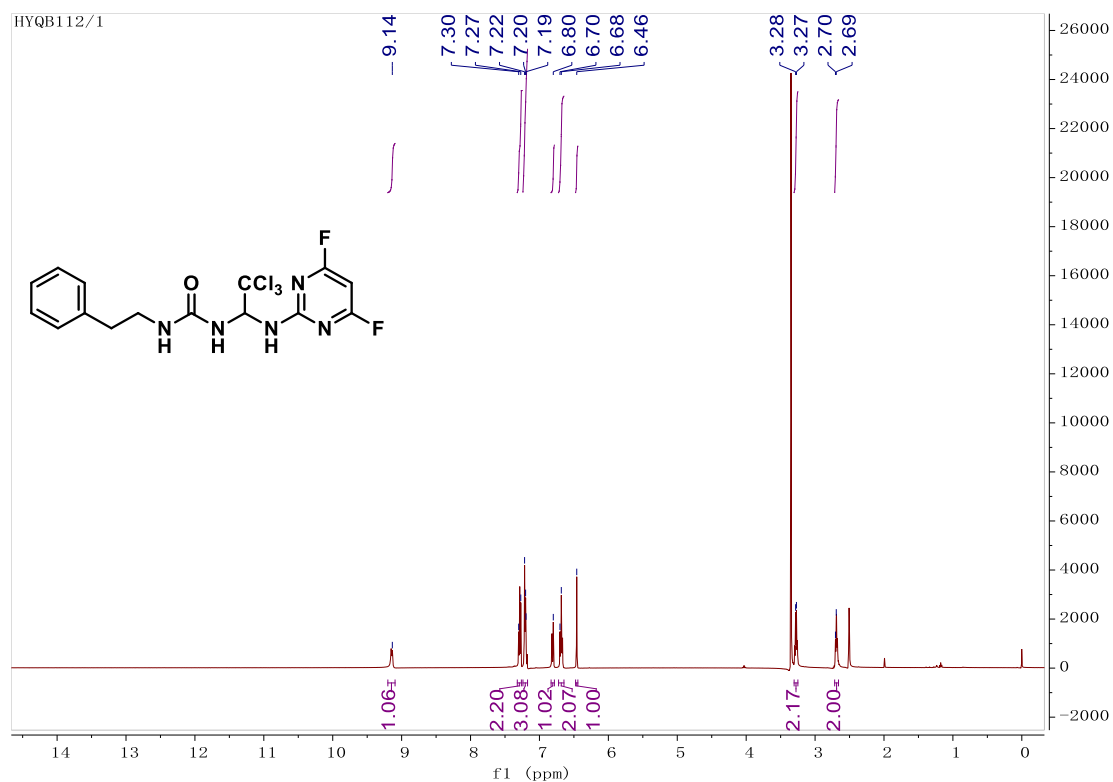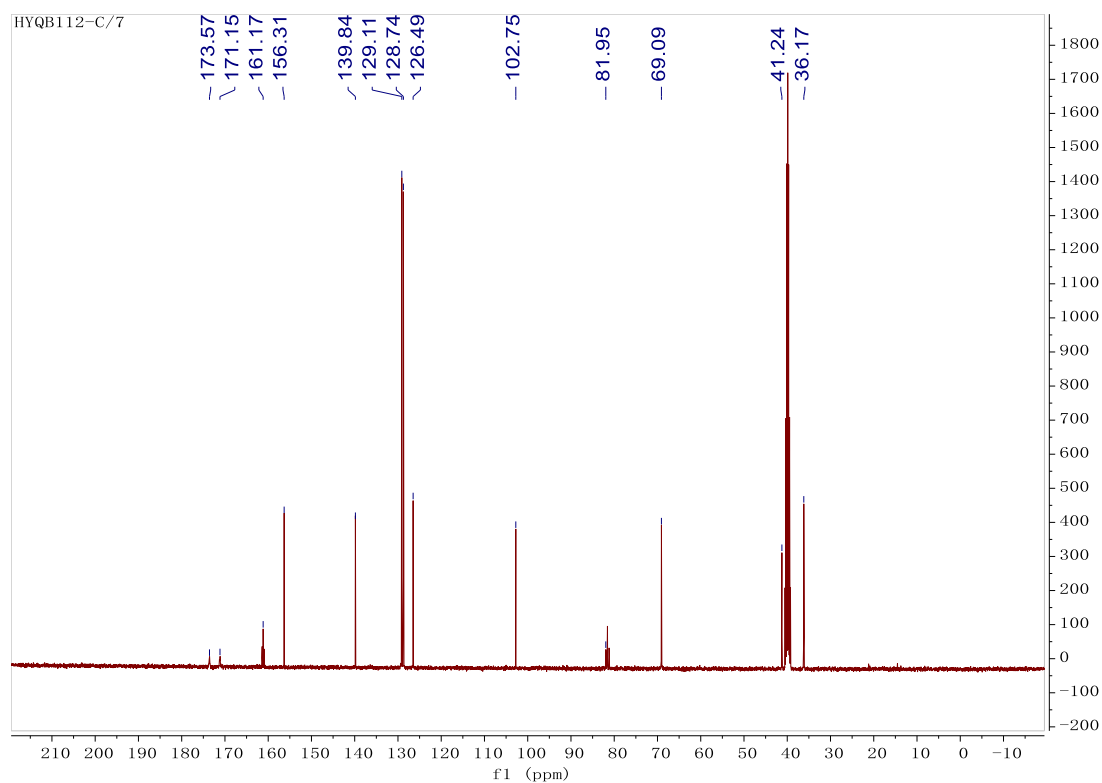

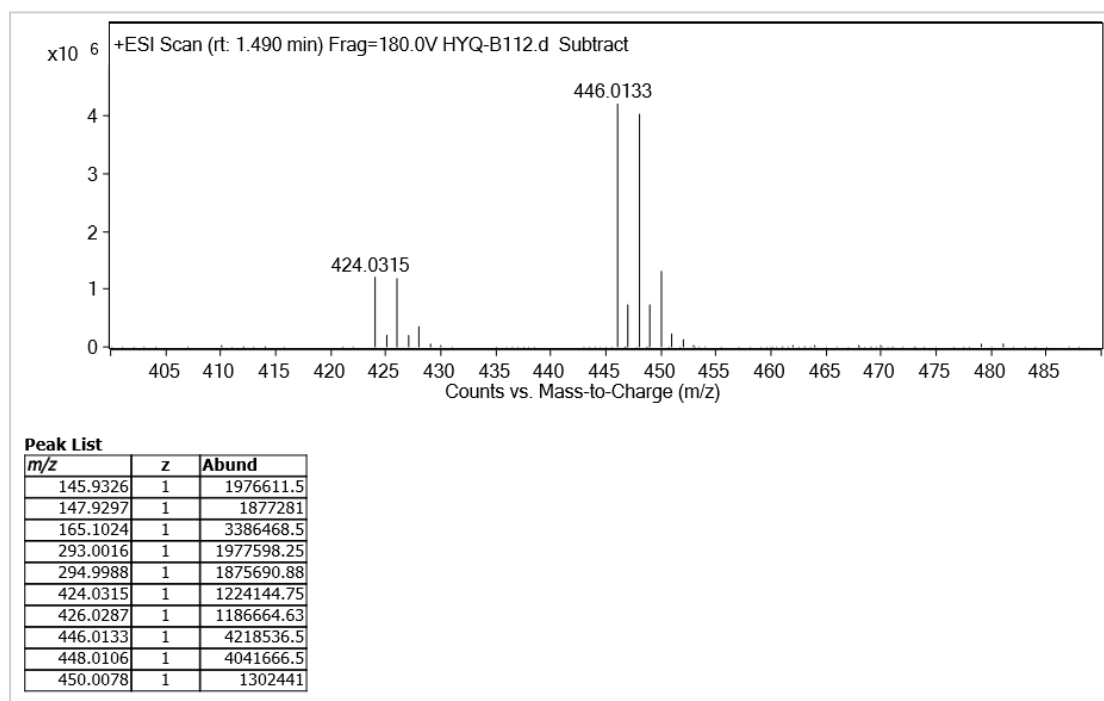

## Compound 23

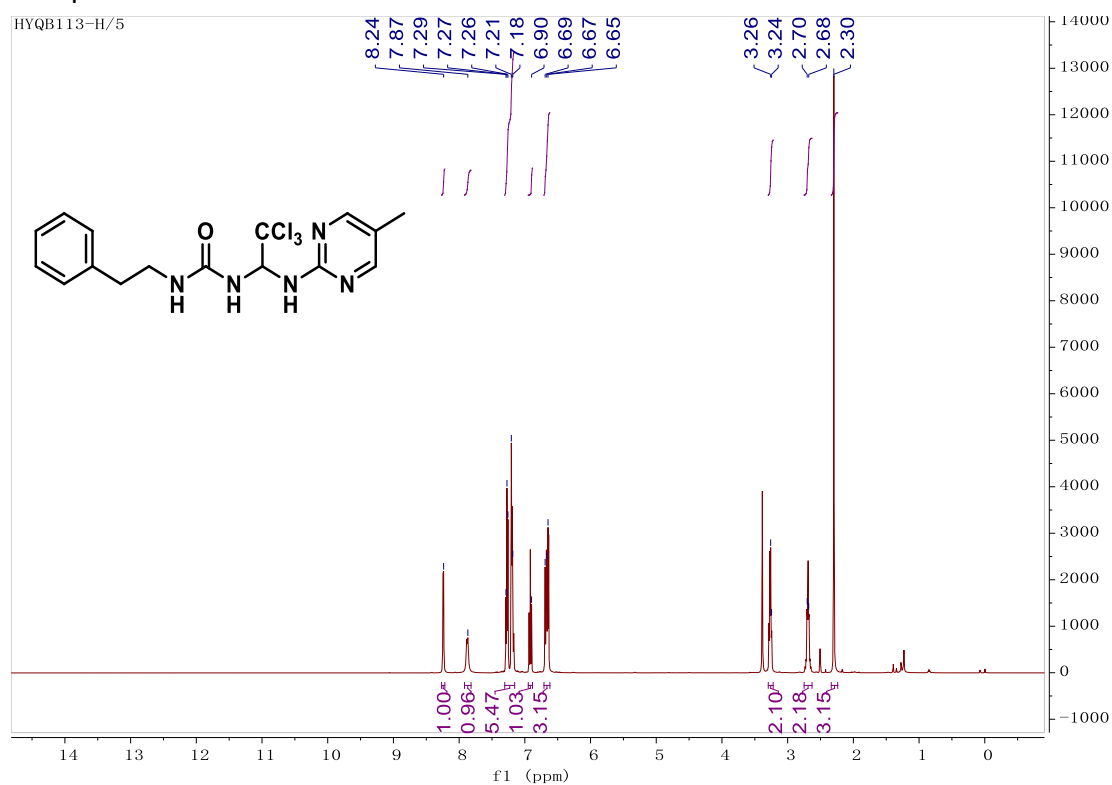

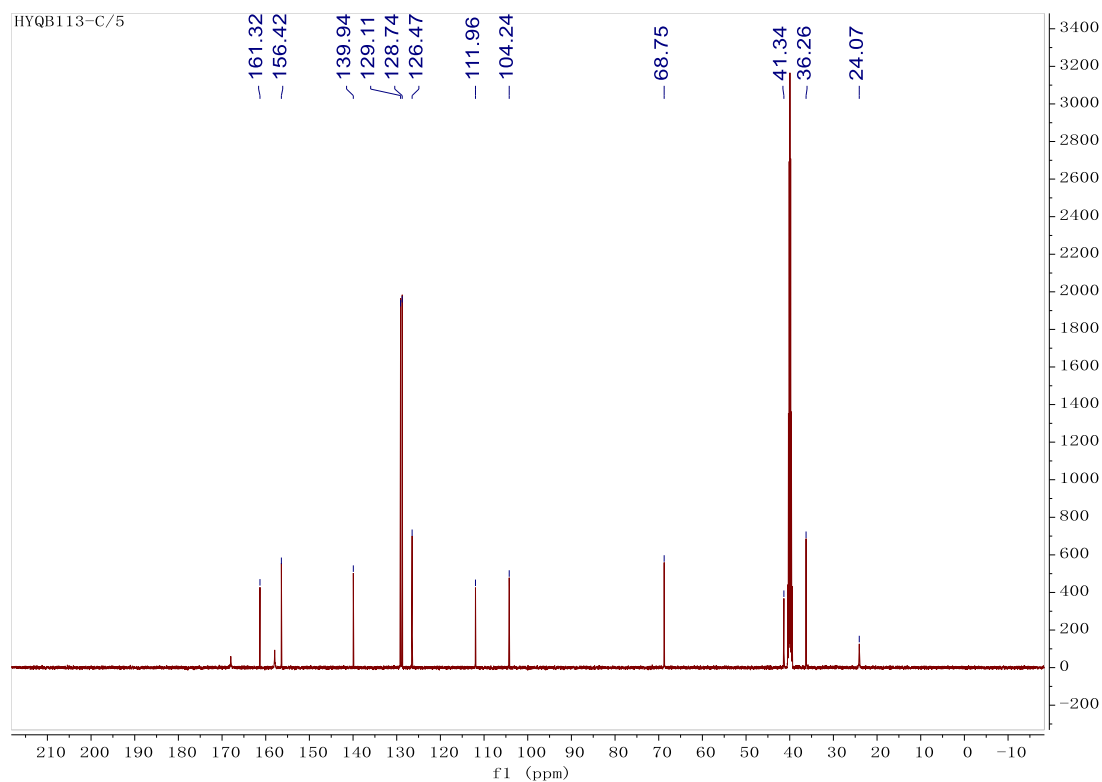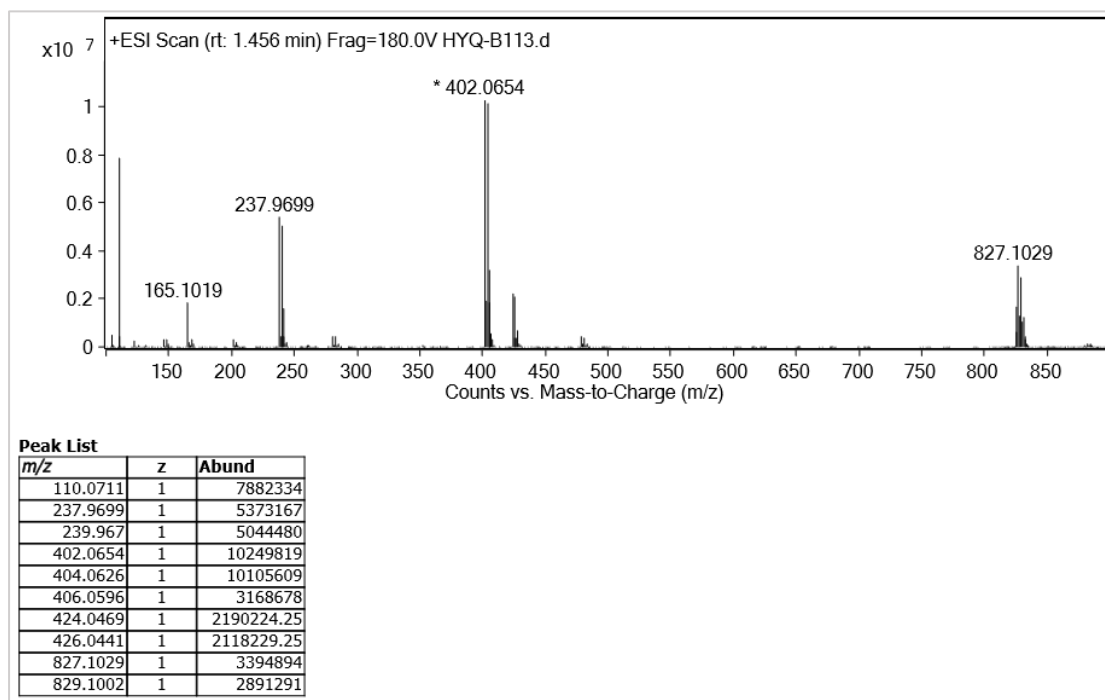

# Compound24

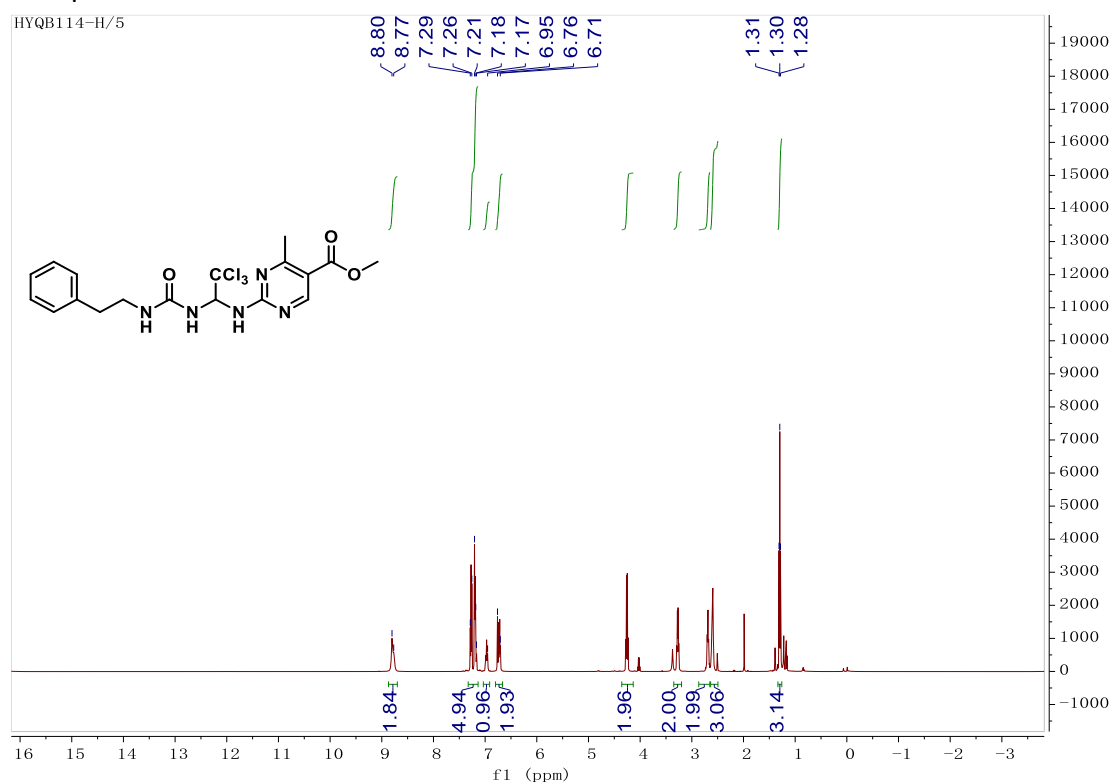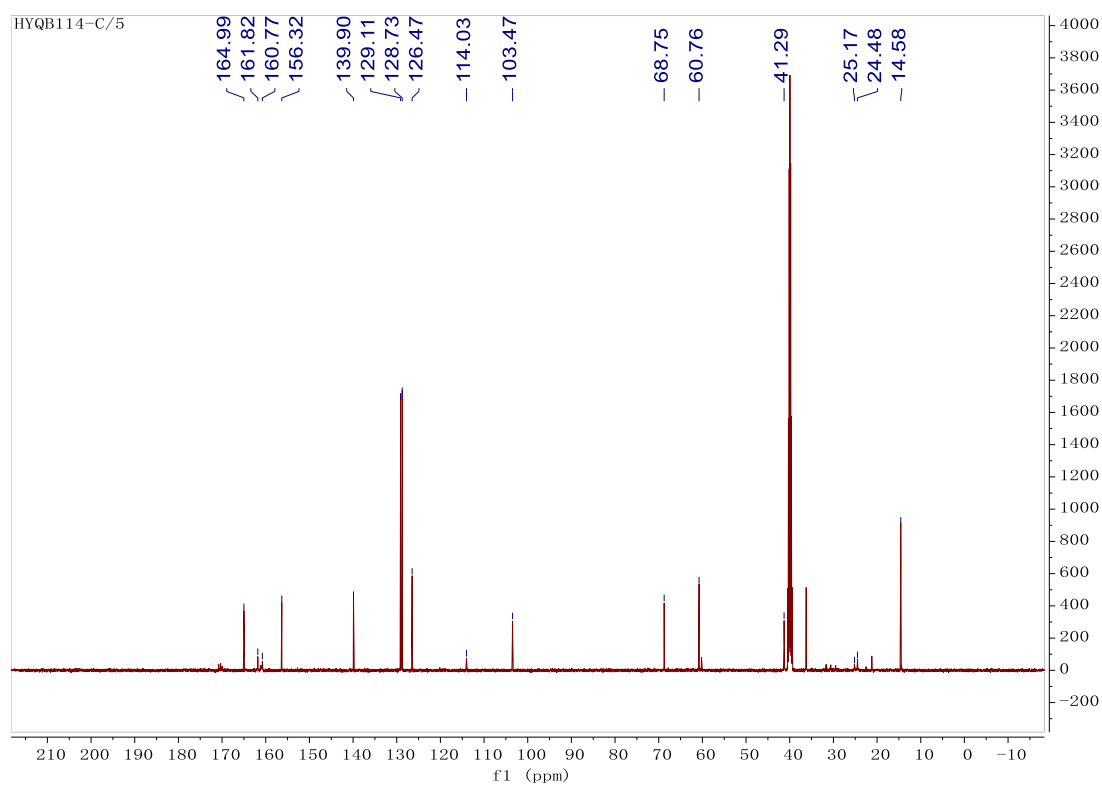

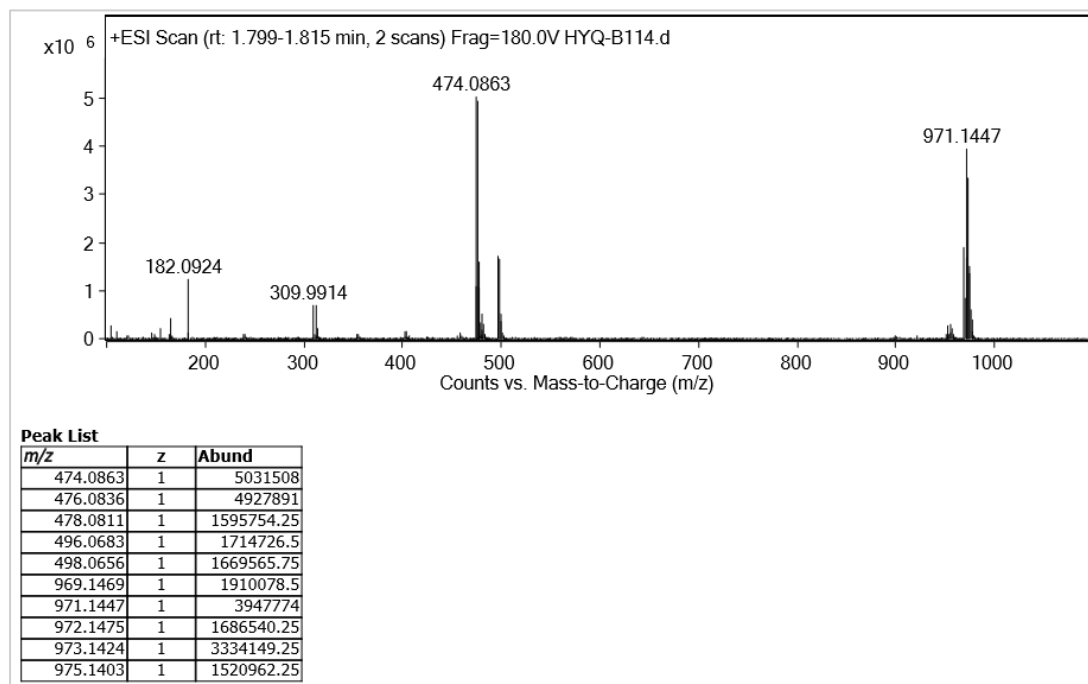

## Compound 25

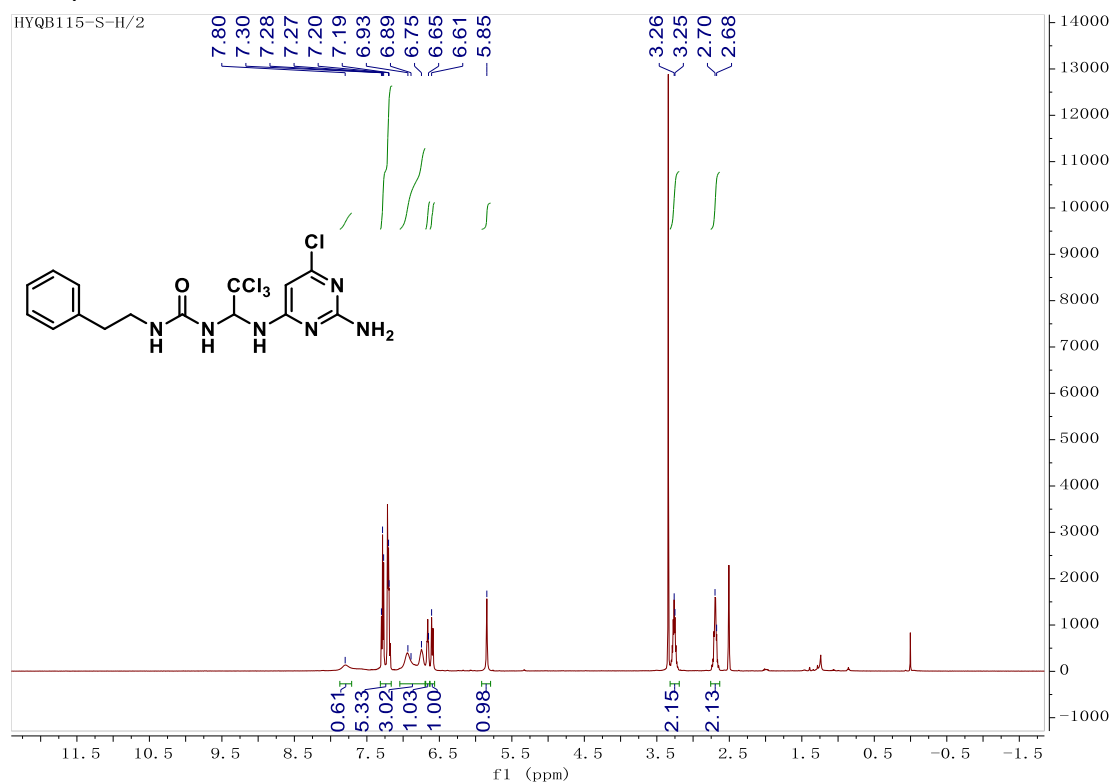

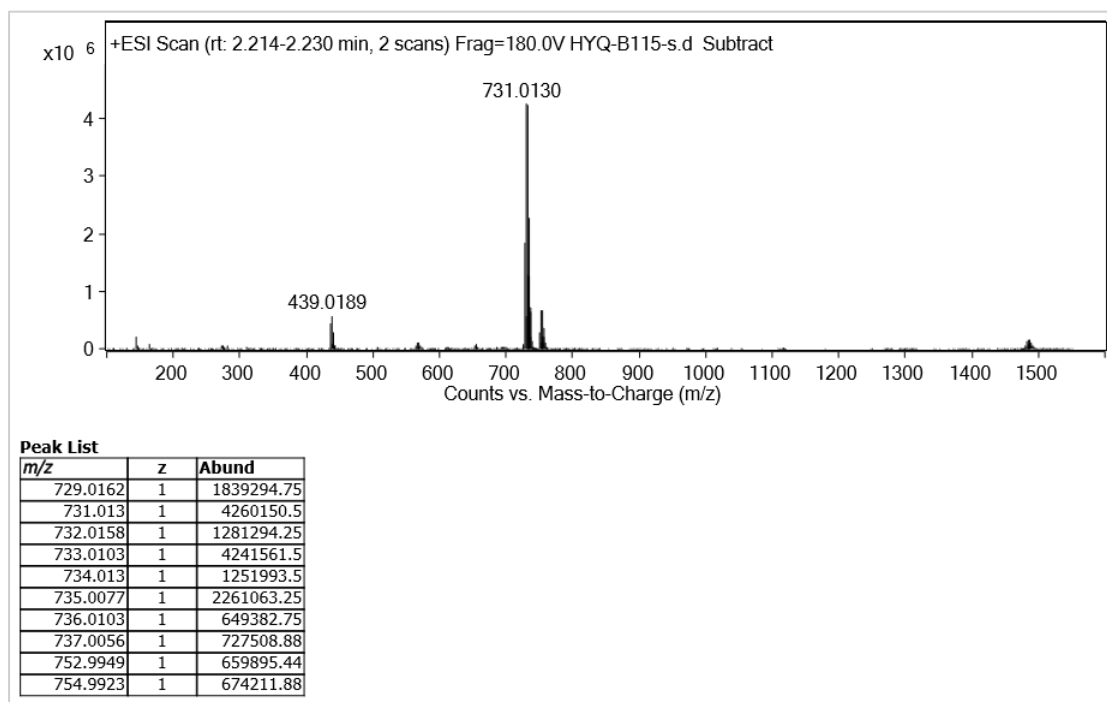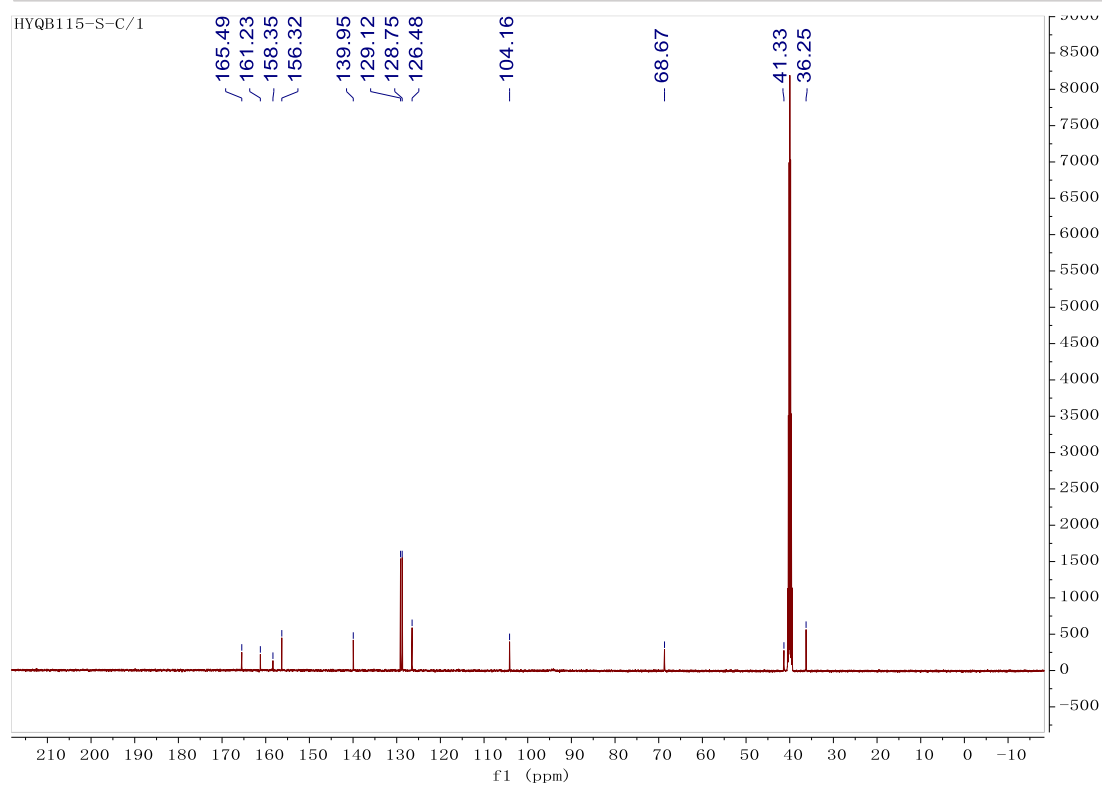



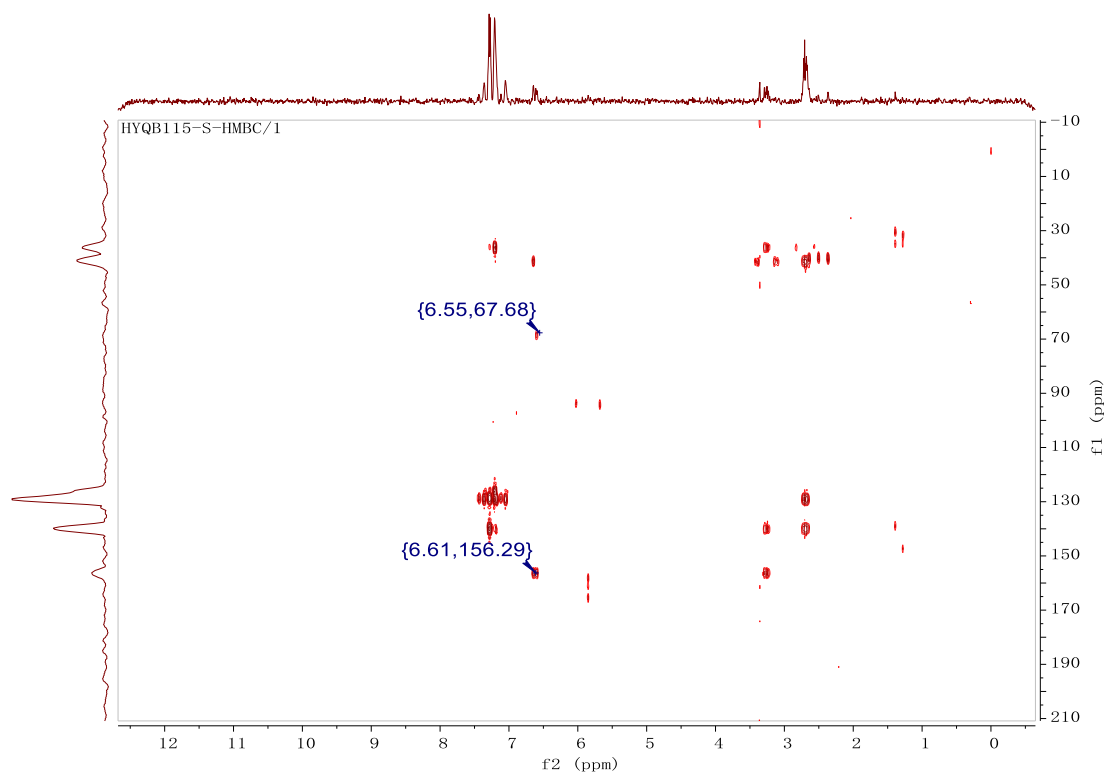

## Compound 26

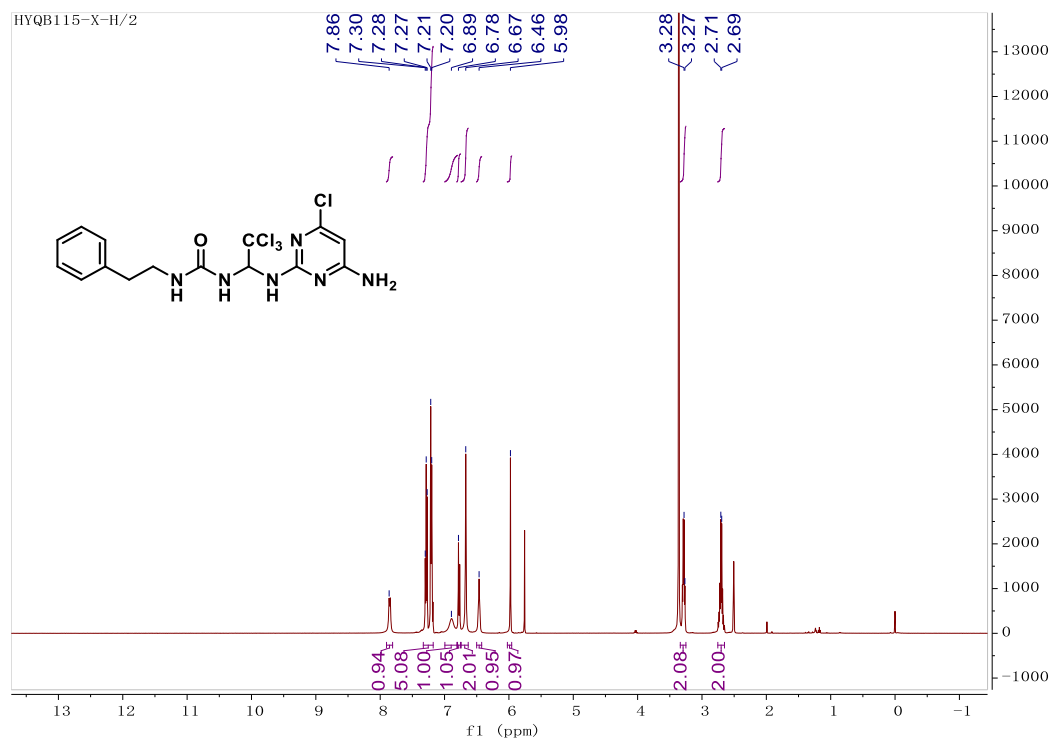

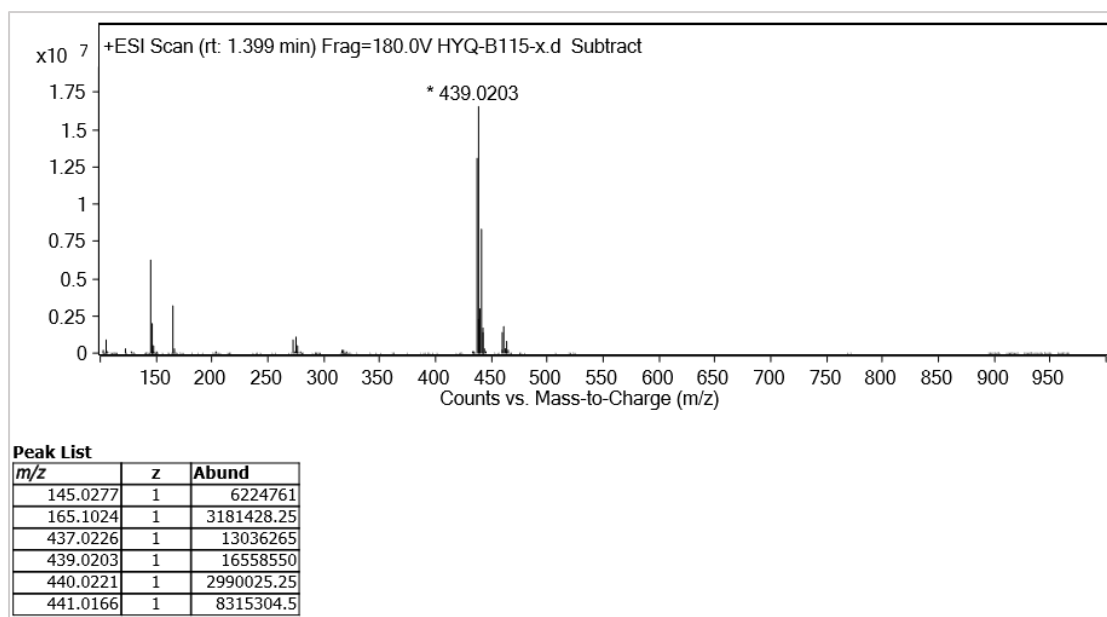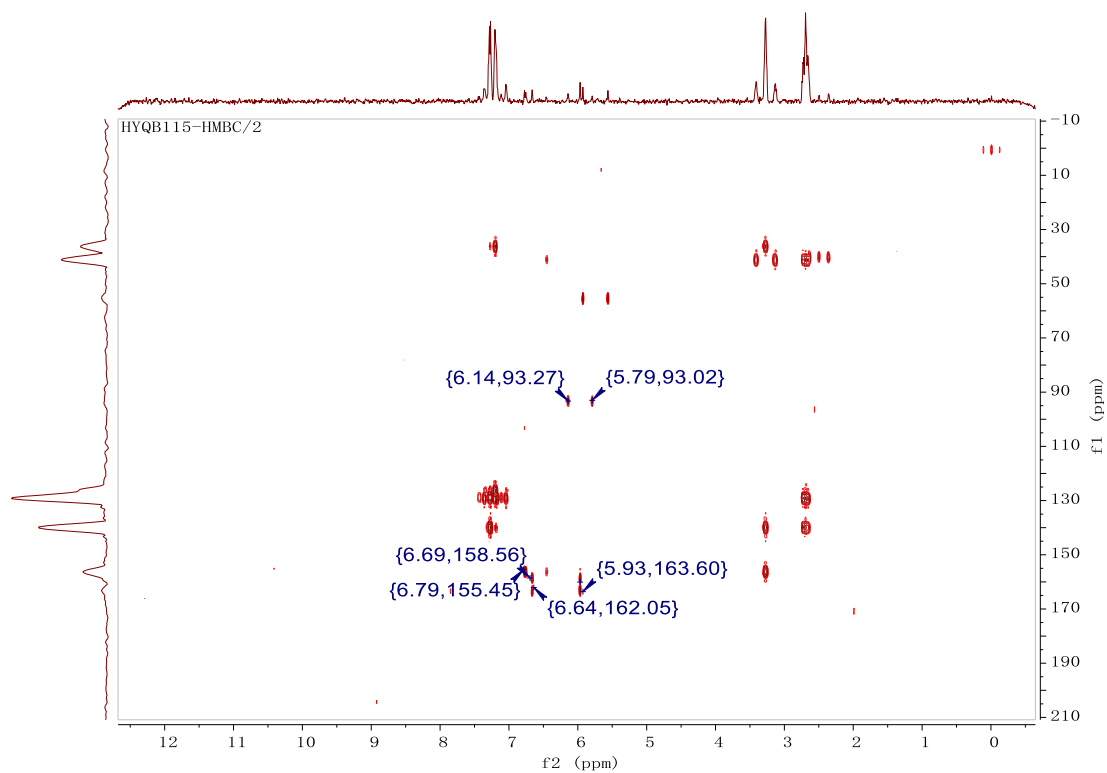

# Compound 27

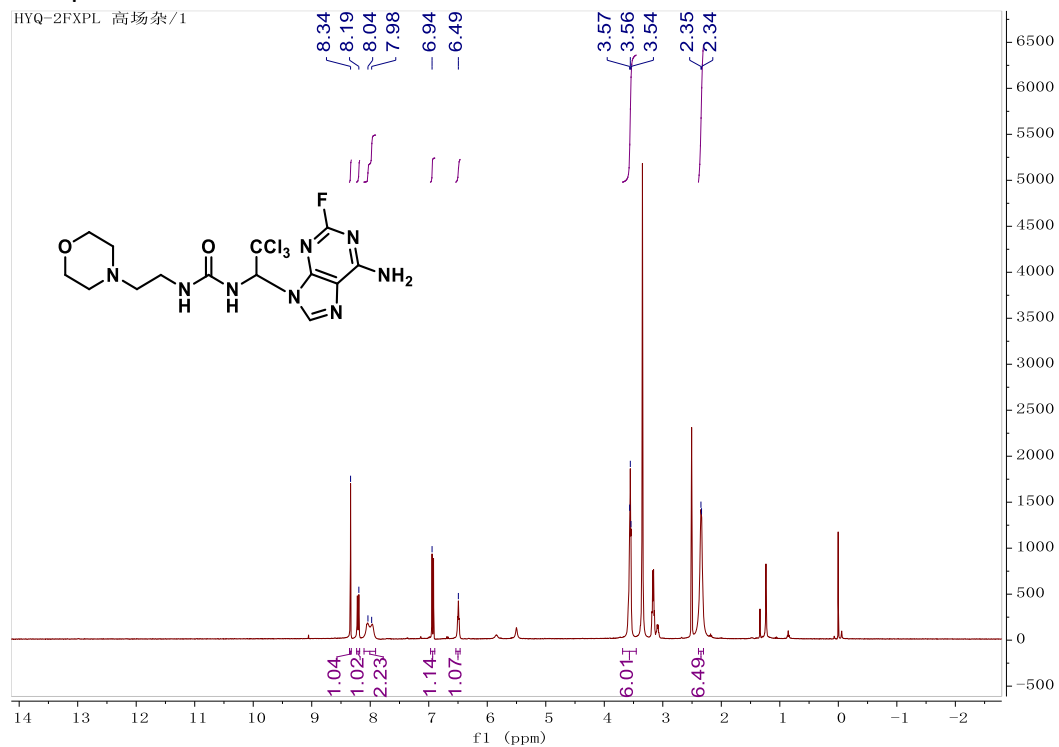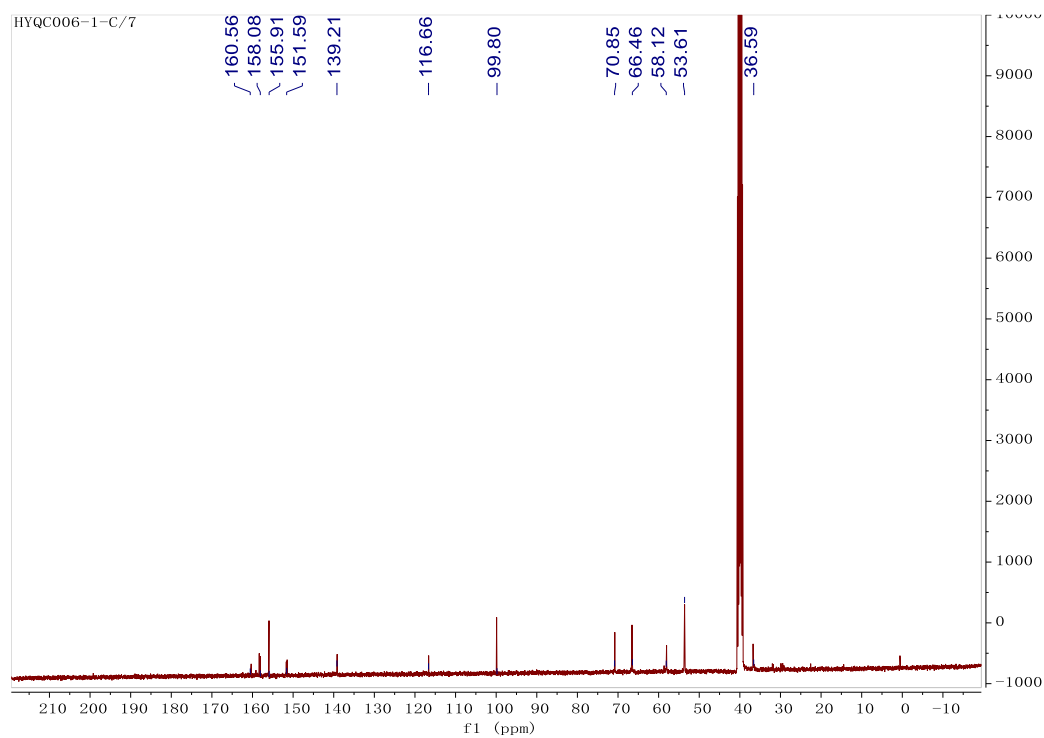

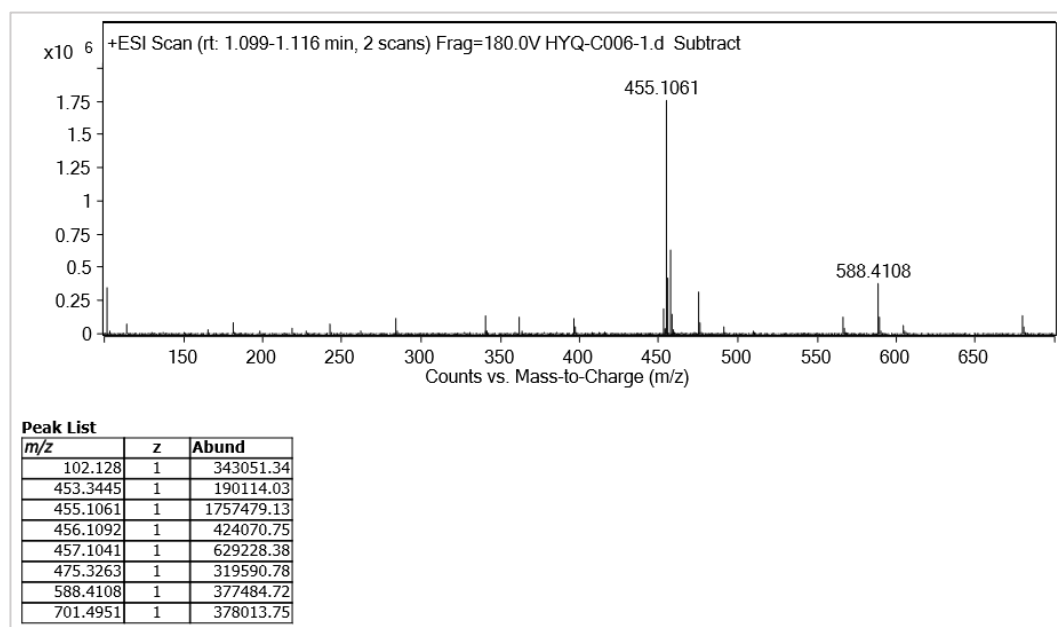

## Compound 28

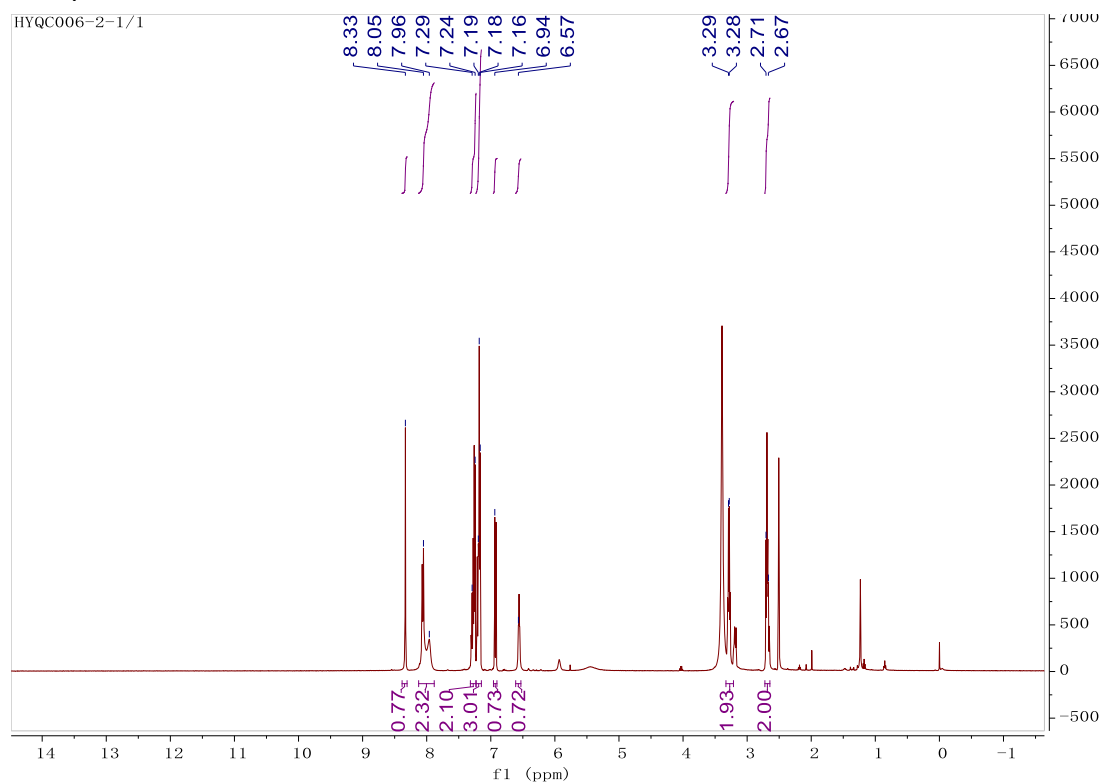

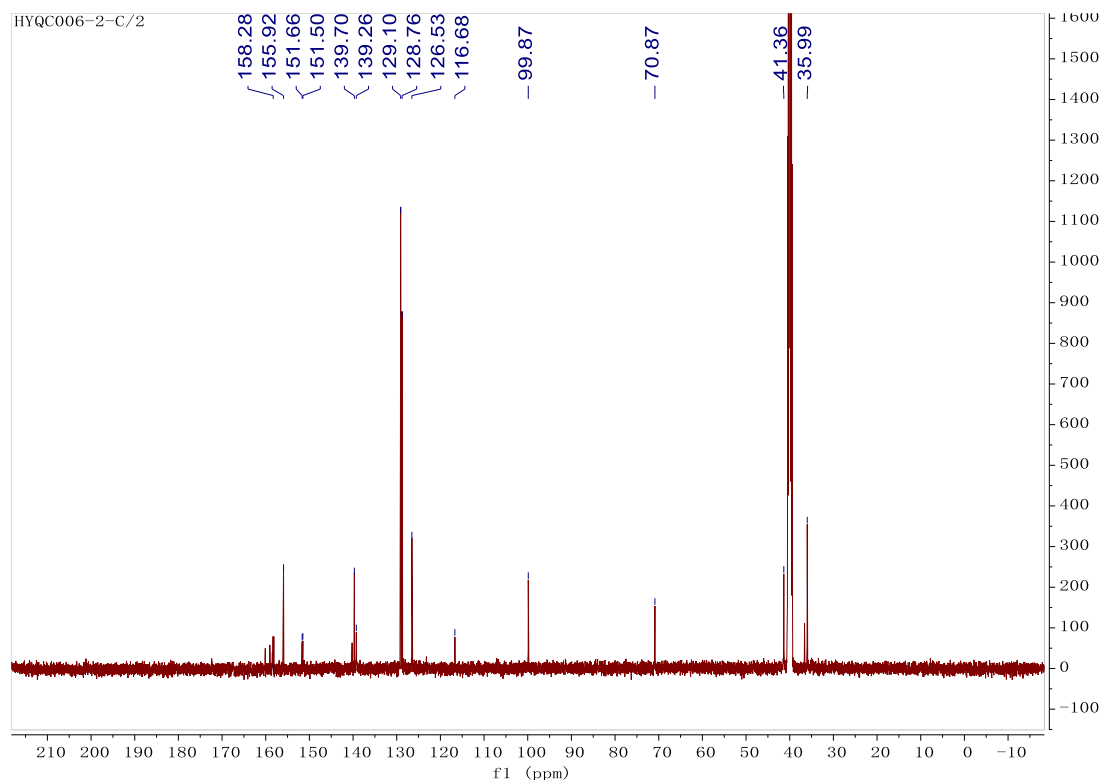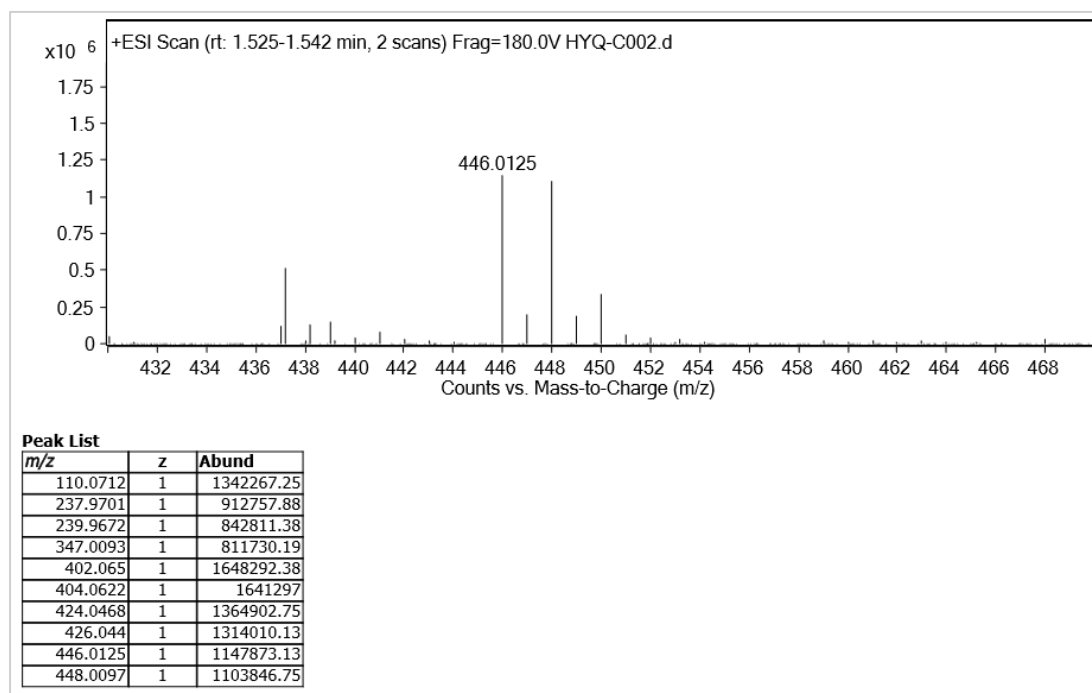

# Compound 29

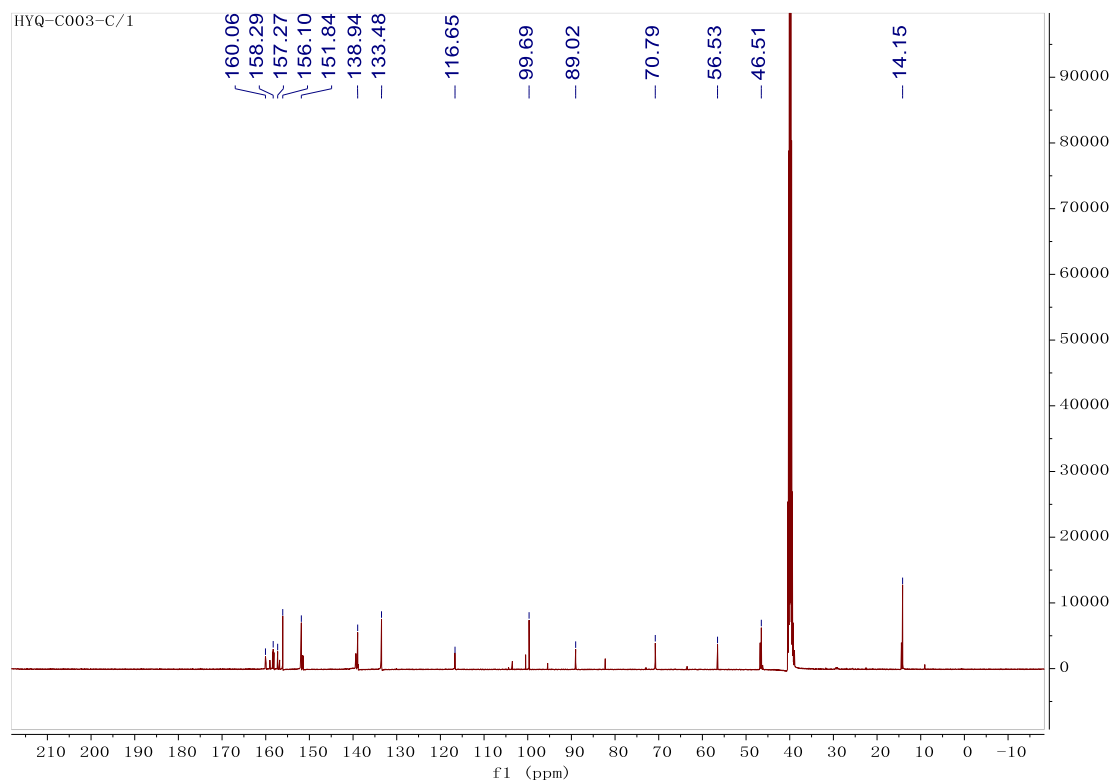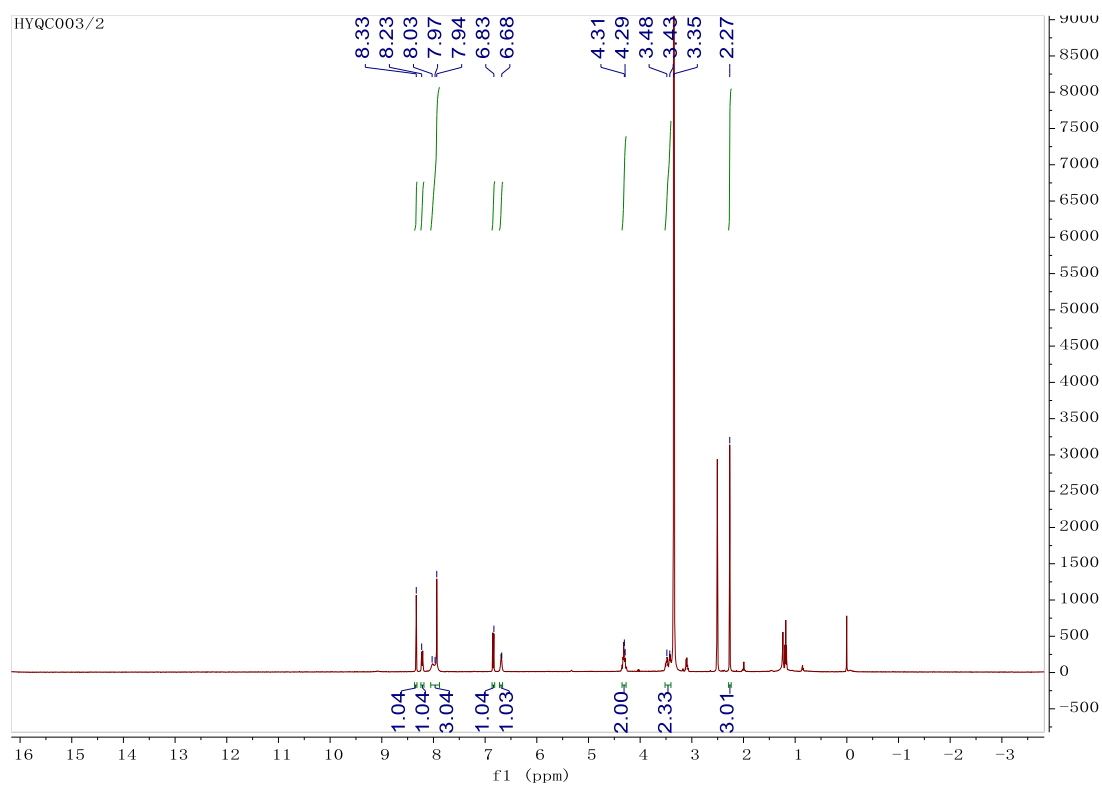

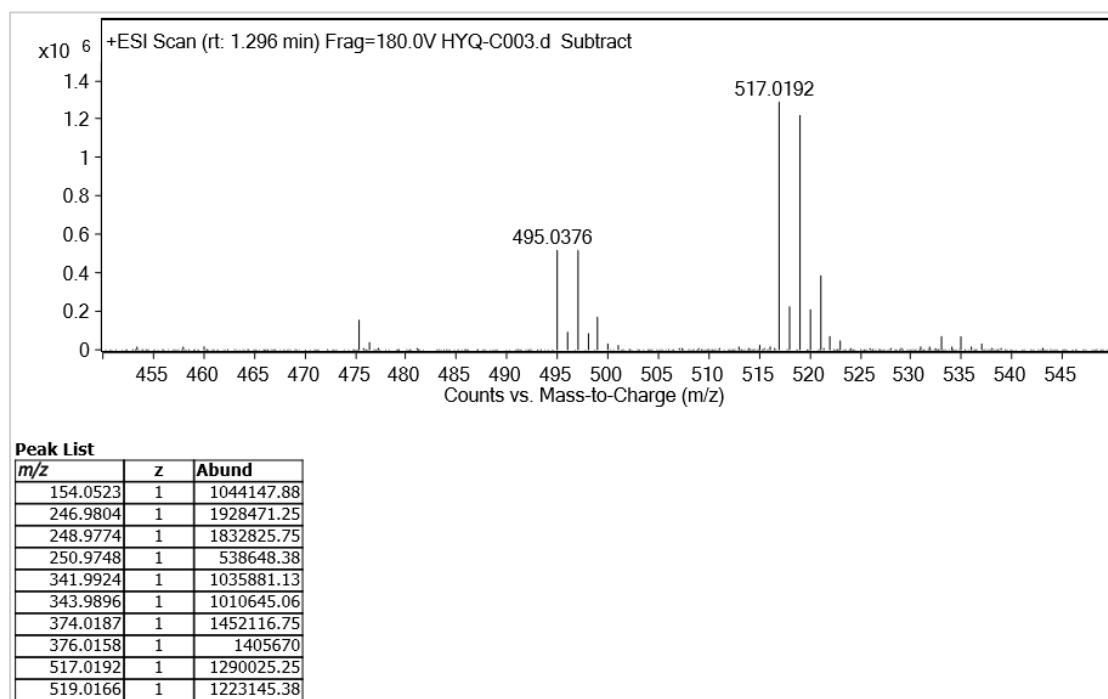

## Compound 30

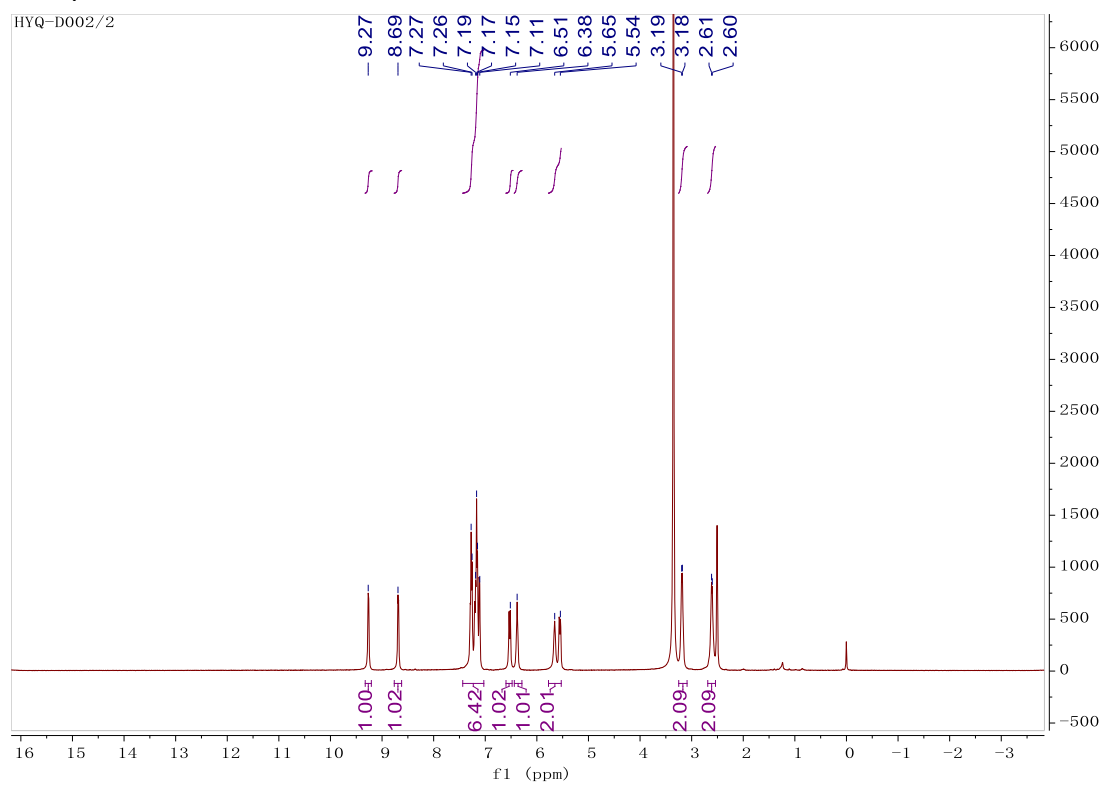

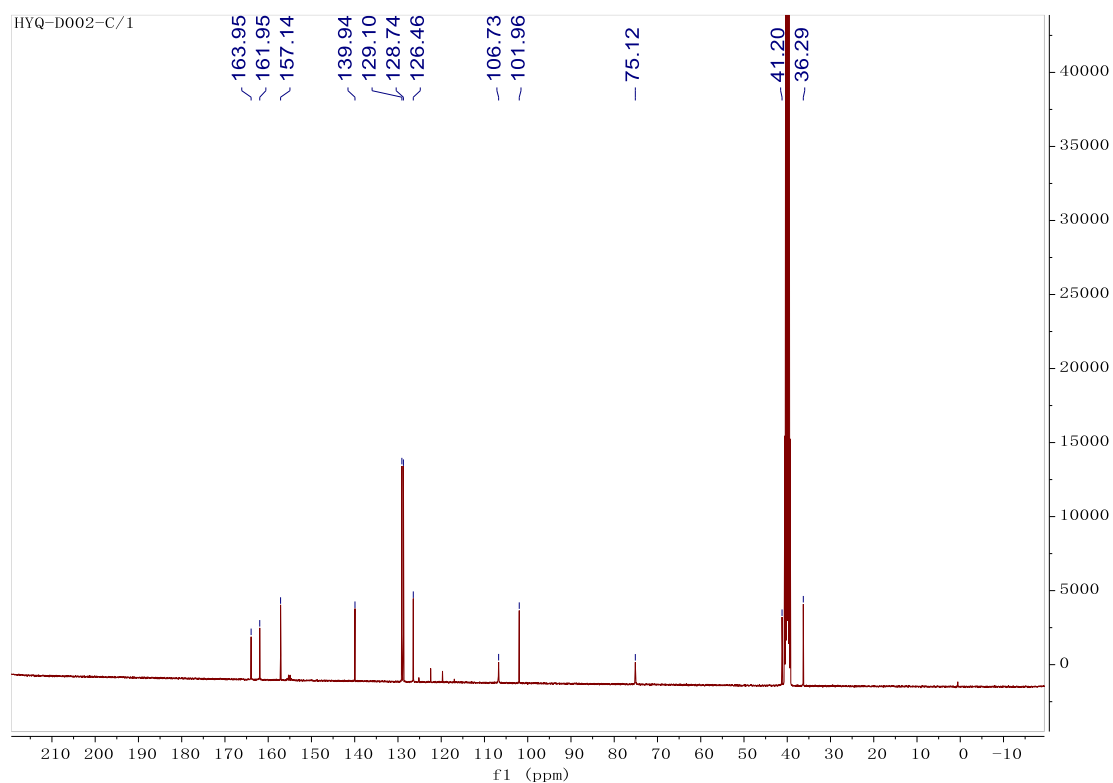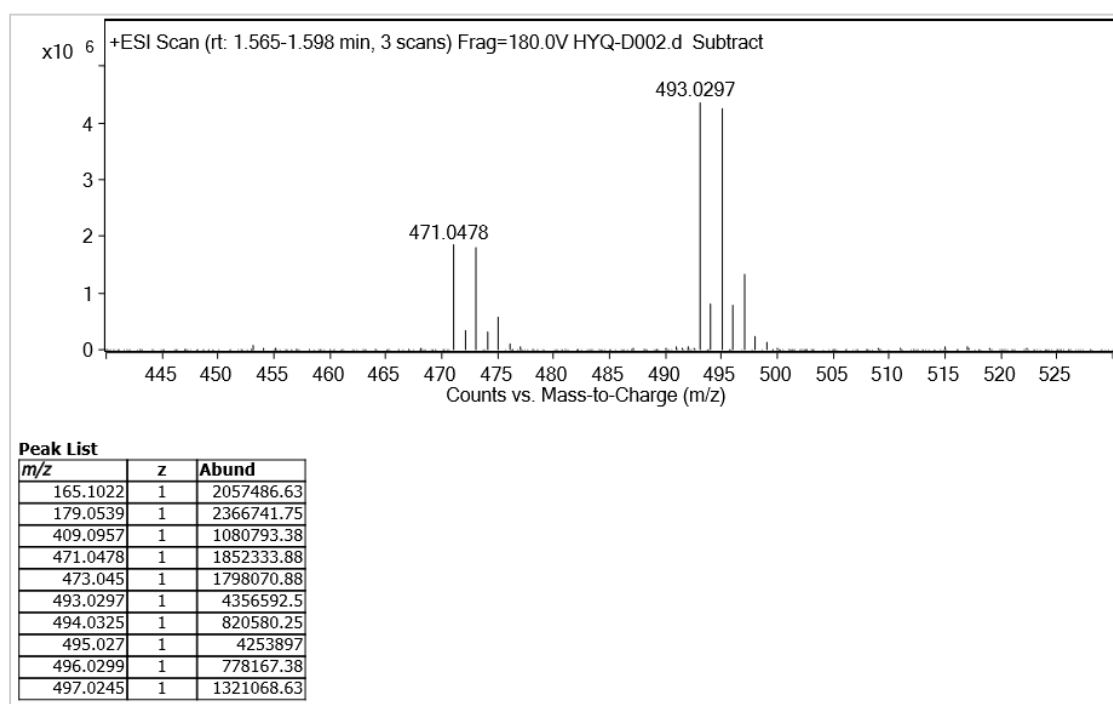

Supplement: s1 [file s1]
